# Supplementary material for: Choosing the right precursor for thermal decomposition solution-phase synthesis of iron nanoparticles: tunable dissociation energies of ferrocene derivatives
Source: Royal Society of Chemistry journal article supplement (doi:10.1039/c6cp06921e), 2016-01-01
Supplement: c6cp06921e1.pdf [file c6cp06921e1.pdf]

**Supporting Information**

*for*

**Choosing the right precursor for thermal decomposition solution-phase  
synthesis of iron nanoparticles: Tunable dissociation energies of ferrocene  
derivatives**

*Cameron H. W. Kelly and Matthias Lein\**

Structural Data (Cartesian coordinates in Å) for all compounds considered.

24

Energy: -1060191.0071752

|    |          |          |          |
|----|----------|----------|----------|
| Fe | 0.04431  | 0.14356  | 0.00000  |
| C  | 1.09035  | -1.10567 | 1.21235  |
| C  | 1.79893  | -0.90900 | 0.00000  |
| C  | -0.23500 | -1.56350 | 1.15395  |
| H  | 1.51888  | -0.74278 | 2.13978  |
| C  | 1.09035  | -1.10567 | -1.21235 |
| C  | -0.23500 | -1.56350 | -1.15395 |
| H  | 1.51888  | -0.74278 | -2.13978 |
| C  | -0.67149 | -2.42303 | 0.00000  |
| H  | -1.75898 | -2.51906 | 0.00000  |
| H  | -0.25286 | -3.44336 | 0.00000  |
| C  | -1.48866 | 1.32762  | 0.70728  |
| C  | -0.23500 | 1.83744  | 1.14770  |
| C  | -1.48866 | 1.32762  | -0.70728 |
| H  | -2.28998 | 0.97918  | 1.34068  |
| C  | 0.53475  | 2.15516  | 0.00000  |
| H  | 0.07881  | 1.94808  | 2.17471  |
| C  | -0.23500 | 1.83744  | -1.14770 |
| H  | -2.28998 | 0.97918  | -1.34068 |
| H  | 1.54086  | 2.54716  | 0.00000  |
| H  | 0.07881  | 1.94808  | -2.17471 |
| H  | -0.82164 | -1.54682 | -2.06612 |
| H  | -0.82164 | -1.54682 | 2.06612  |
| H  | 2.79326  | -0.48213 | 0.00000  |

21

Energy: -3342097.3309190

|    |          |          |          |
|----|----------|----------|----------|
| Fe | 0.00000  | 0.00000  | 0.30759  |
| C  | -1.54646 | 0.89997  | 1.28989  |
| C  | -0.38839 | 1.71776  | 1.33169  |
| C  | -1.88414 | 0.71105  | -0.07506 |
| H  | -2.06987 | 0.48996  | 2.13917  |
| C  | 0.00000  | 2.02858  | -0.00278 |
| C  | -0.92979 | 1.39626  | -0.87945 |
| C  | 0.38839  | -1.71776 | 1.33169  |
| C  | 0.00000  | -2.02858 | -0.00278 |
| C  | 1.54646  | -0.89997 | 1.28989  |
| C  | 0.92979  | -1.39626 | -0.87945 |
| C  | 1.88414  | -0.71105 | -0.07506 |
| H  | 2.06987  | -0.48996 | 2.13917  |
| Cl | -3.25492 | -0.11047 | -0.65800 |
| Cl | -0.96656 | 1.54937  | -2.56752 |
| Cl | 1.25506  | 3.07001  | -0.46596 |
| Cl | -1.25506 | -3.07001 | -0.46596 |
| Cl | 0.96656  | -1.54937 | -2.56752 |
| Cl | 3.25492  | 0.11047  | -0.65800 |
| Cl | -0.36458 | -2.31030 | 2.74304  |
| Cl | 0.36458  | 2.31030  | 2.74304  |

21

Energy: -3342097.2072996

|    |         |         |         |
|----|---------|---------|---------|
| Fe | 0.00000 | 0.00000 | 0.12038 |
|----|---------|---------|---------|

|    |          |          |          |
|----|----------|----------|----------|
| C  | 0.00000  | -2.01101 | 0.49423  |
| C  | -0.94080 | -1.35858 | 1.33171  |
| C  | -0.38200 | -1.76525 | -0.84932 |
| H  | 0.84839  | -2.59198 | 0.81988  |
| C  | -1.88748 | -0.68341 | 0.50988  |
| C  | -1.54479 | -0.94306 | -0.84926 |
| C  | 1.88748  | 0.68341  | 0.50988  |
| C  | 1.54479  | 0.94306  | -0.84926 |
| C  | 0.94080  | 1.35858  | 1.33171  |
| C  | 0.38200  | 1.76525  | -0.84932 |
| C  | 0.00000  | 2.01101  | 0.49423  |
| H  | -0.84839 | 2.59198  | 0.81988  |
| Cl | -3.25911 | 0.16412  | 1.04672  |
| Cl | -2.44111 | -0.47255 | -2.20910 |
| Cl | 0.35743  | -2.42443 | -2.23223 |
| Cl | 0.99643  | 1.44939  | 3.02941  |
| Cl | 3.25911  | -0.16412 | 1.04672  |
| Cl | 2.44111  | 0.47255  | -2.20910 |
| Cl | -0.35743 | 2.42443  | -2.23223 |
| Cl | -0.99643 | -1.44939 | 3.02941  |

21

Energy: -2188832.4442279

|    |          |          |          |
|----|----------|----------|----------|
| Fe | 0.73576  | -0.14051 | 0.00000  |
| C  | 0.06123  | 1.78313  | 0.00000  |
| C  | -0.40789 | 1.08564  | -1.14370 |
| C  | -0.40789 | 1.08564  | 1.14370  |
| H  | 0.65912  | 2.68025  | 0.00000  |
| C  | -1.16139 | -0.04371 | -0.71331 |
| C  | -1.16139 | -0.04371 | 0.71331  |
| C  | 2.78554  | -0.07023 | 0.00000  |
| C  | 2.31549  | -0.75988 | 1.14906  |
| C  | 2.31549  | -0.75988 | -1.14906 |
| H  | 3.36825  | 0.83830  | 0.00000  |
| C  | 1.55689  | -1.87655 | 0.70990  |
| H  | 2.46684  | -0.46047 | 2.17520  |
| C  | 1.55689  | -1.87655 | -0.70990 |
| H  | 2.46684  | -0.46047 | -2.17520 |
| H  | 1.02924  | -2.57323 | 1.34379  |
| H  | 1.02924  | -2.57323 | -1.34379 |
| Cl | -2.01358 | -1.12640 | -1.71227 |
| Cl | -2.01358 | -1.12640 | 1.71227  |
| Cl | -0.18839 | 1.56930  | -2.76732 |
| Cl | -0.18839 | 1.56930  | 2.76732  |

21

Energy: -3342096.9212244

|    |          |          |          |
|----|----------|----------|----------|
| Fe | 0.00000  | 0.00000  | 0.40861  |
| C  | 0.00000  | 1.63706  | 1.63502  |
| C  | 1.14398  | 1.65649  | 0.79657  |
| C  | -1.14398 | 1.65649  | 0.79657  |
| H  | 0.00000  | 1.63235  | 2.71325  |
| C  | 0.71281  | 1.66484  | -0.56000 |
| C  | -0.71281 | 1.66484  | -0.56000 |
| C  | 0.00000  | -1.63706 | 1.63502  |
| C  | -1.14398 | -1.65649 | 0.79657  |

|    |          |          |          |
|----|----------|----------|----------|
| C  | 1.14398  | -1.65649 | 0.79657  |
| H  | 0.00000  | -1.63235 | 2.71325  |
| C  | -0.71281 | -1.66484 | -0.56000 |
| C  | 0.71281  | -1.66484 | -0.56000 |
| C1 | -1.70682 | 1.79742  | -1.92691 |
| C1 | -2.75943 | 1.76719  | 1.31885  |
| C1 | 1.70682  | 1.79742  | -1.92691 |
| C1 | 2.75943  | 1.76719  | 1.31885  |
| C1 | 2.75943  | -1.76719 | 1.31885  |
| C1 | 1.70682  | -1.79742 | -1.92691 |
| C1 | -1.70682 | -1.79742 | -1.92691 |
| C1 | -2.75943 | -1.76719 | 1.31885  |

21  
Energy: -3342097.3309190

|    |          |          |          |
|----|----------|----------|----------|
| Fe | 0.00000  | 0.00000  | 0.30759  |
| C  | 0.00000  | 2.02858  | -0.00277 |
| C  | -0.92978 | 1.39627  | -0.87945 |
| C  | -0.38839 | 1.71775  | 1.33169  |
| C  | -1.88414 | 0.71105  | -0.07507 |
| C  | -1.54647 | 0.89996  | 1.28988  |
| H  | -2.06989 | 0.48995  | 2.13916  |
| C  | 0.92978  | -1.39627 | -0.87945 |
| C  | 1.88414  | -0.71105 | -0.07507 |
| C  | 0.00000  | -2.02858 | -0.00277 |
| C  | 1.54647  | -0.89996 | 1.28988  |
| C  | 0.38839  | -1.71775 | 1.33169  |
| H  | 2.06989  | -0.48995 | 2.13916  |
| C1 | 3.25492  | 0.11046  | -0.65804 |
| C1 | 1.25507  | 3.07000  | -0.46594 |
| C1 | -0.36454 | -2.31029 | 2.74306  |
| C1 | -1.25507 | -3.07000 | -0.46594 |
| C1 | -3.25492 | -0.11046 | -0.65804 |
| C1 | 0.36454  | 2.31029  | 2.74306  |
| C1 | -0.96654 | 1.54937  | -2.56752 |
| C1 | 0.96654  | -1.54937 | -2.56752 |

21  
Energy: -3342097.2359204

|    |          |          |          |
|----|----------|----------|----------|
| Fe | 0.00000  | 0.00000  | 0.00000  |
| C  | 1.62905  | 1.01135  | 0.71313  |
| C  | 1.62905  | 1.01135  | -0.71313 |
| C  | 0.42772  | 1.64170  | 1.14399  |
| C  | 0.42772  | 1.64170  | -1.14399 |
| C  | -0.32121 | 2.02060  | 0.00000  |
| H  | -1.28422 | 2.50611  | 0.00000  |
| C  | -0.42772 | -1.64170 | -1.14399 |
| C  | 0.32121  | -2.02060 | 0.00000  |
| C  | -1.62905 | -1.01135 | -0.71313 |
| C  | -0.42772 | -1.64170 | 1.14399  |
| H  | 1.28422  | -2.50611 | 0.00000  |
| C  | -1.62905 | -1.01135 | 0.71313  |
| C1 | 2.88663  | 0.45696  | 1.70977  |
| C1 | 0.00000  | 1.94820  | 2.76282  |
| C1 | 0.00000  | -1.94820 | 2.76282  |
| C1 | -2.88663 | -0.45696 | 1.70977  |

|    |          |          |          |
|----|----------|----------|----------|
| C1 | -2.88663 | -0.45696 | -1.70977 |
| C1 | 0.00000  | -1.94820 | -2.76282 |
| C1 | 2.88663  | 0.45696  | -1.70977 |
| C1 | 0.00000  | 1.94820  | -2.76282 |

21  
Energy: -2188832.0719642

|    |          |          |          |
|----|----------|----------|----------|
| Fe | 0.73115  | 0.13772  | 0.00000  |
| C  | -1.16641 | 0.03640  | 0.71319  |
| C  | -1.16641 | 0.03640  | -0.71319 |
| C  | -0.41167 | -1.09165 | 1.14336  |
| C  | -0.41167 | -1.09165 | -1.14336 |
| C  | 0.05807  | -1.78860 | 0.00000  |
| H  | 0.65990  | -2.68313 | 0.00000  |
| C  | 1.88850  | 1.38184  | -1.14864 |
| C  | 1.41462  | 2.06881  | 0.00000  |
| C  | 2.65311  | 0.26976  | -0.71021 |
| H  | 1.66367  | 1.63167  | -2.17459 |
| C  | 1.88850  | 1.38184  | 1.14864  |
| H  | 0.76783  | 2.93319  | 0.00000  |
| C  | 2.65311  | 0.26976  | 0.71021  |
| H  | 3.11642  | -0.46962 | -1.34587 |
| H  | 1.66367  | 1.63167  | 2.17459  |
| H  | 3.11642  | -0.46962 | 1.34587  |
| C1 | -2.00823 | 1.12641  | 1.71240  |
| C1 | -0.17989 | -1.56736 | 2.76720  |
| C1 | -0.17989 | -1.56736 | -2.76720 |
| C1 | -2.00823 | 1.12641  | -1.71240 |

21  
Energy: -3342097.3309190

|    |          |          |          |
|----|----------|----------|----------|
| Fe | 0.00000  | 0.00000  | -0.30759 |
| C  | -0.92979 | 1.39626  | 0.87945  |
| C  | 0.00000  | 2.02858  | 0.00277  |
| C  | -1.88414 | 0.71105  | 0.07506  |
| C  | -0.38839 | 1.71776  | -1.33169 |
| C  | -1.54646 | 0.89996  | -1.28988 |
| H  | -2.06988 | 0.48995  | -2.13917 |
| C  | 1.88414  | -0.71105 | 0.07506  |
| C  | 0.92979  | -1.39626 | 0.87945  |
| C  | 1.54646  | -0.89996 | -1.28988 |
| C  | 0.00000  | -2.02858 | 0.00277  |
| C  | 0.38839  | -1.71776 | -1.33169 |
| H  | 2.06988  | -0.48995 | -2.13917 |
| C1 | -3.25492 | -0.11047 | 0.65802  |
| C1 | -0.96655 | 1.54938  | 2.56752  |
| C1 | 1.25506  | 3.07001  | 0.46595  |
| C1 | 0.96655  | -1.54938 | 2.56752  |
| C1 | 3.25492  | 0.11047  | 0.65802  |
| C1 | -1.25506 | -3.07001 | 0.46595  |
| C1 | -0.36456 | -2.31029 | -2.74305 |
| C1 | 0.36456  | 2.31029  | -2.74305 |

21  
Energy: -2477148.0901796

|    |          |          |          |
|----|----------|----------|----------|
| Fe | 0.00000  | 0.00000  | 0.78437  |
| C  | 0.00000  | -1.21212 | -0.84048 |
| C  | -1.15280 | -0.37457 | -0.84048 |
| C  | 1.15280  | -0.37457 | -0.84048 |
| C  | -0.71247 | 0.98063  | -0.84048 |
| C  | 0.71247  | 0.98063  | -0.84048 |
| C  | 0.00000  | -1.20775 | 2.44051  |
| C  | 1.14864  | -0.37322 | 2.44051  |
| C  | -1.14864 | -0.37322 | 2.44051  |
| H  | 0.00000  | -2.28641 | 2.39567  |
| C  | 0.70990  | 0.97709  | 2.44051  |
| H  | 2.17451  | -0.70654 | 2.39567  |
| C  | -0.70990 | 0.97709  | 2.44051  |
| H  | -2.17451 | -0.70654 | 2.39567  |
| H  | 1.34392  | 1.84975  | 2.39567  |
| H  | -1.34392 | 1.84975  | 2.39567  |
| Cl | 1.71069  | 2.35456  | -0.94556 |
| Cl | 2.76796  | -0.89936 | -0.94556 |
| Cl | -1.71069 | 2.35456  | -0.94556 |
| Cl | -2.76796 | -0.89936 | -0.94556 |
| Cl | 0.00000  | -2.91040 | -0.94556 |

21  
Energy: -3918726.9967006

|    |          |          |          |
|----|----------|----------|----------|
| Fe | -0.00003 | 0.00000  | 0.00000  |
| C  | 0.97996  | 0.71199  | 1.65617  |
| C  | -0.37433 | 1.15203  | 1.65615  |
| C  | 0.97996  | -0.71199 | 1.65617  |
| C  | -1.21132 | 0.00000  | 1.65617  |
| C  | -0.37433 | -1.15203 | 1.65615  |
| C  | 0.97996  | 0.71199  | -1.65617 |
| C  | 0.97996  | -0.71199 | -1.65617 |
| C  | -0.37433 | 1.15203  | -1.65615 |
| C  | -0.37433 | -1.15203 | -1.65615 |
| C  | -1.21132 | 0.00000  | -1.65617 |
| Cl | -2.90130 | 0.00000  | 1.78102  |
| Cl | -0.89654 | -2.75930 | 1.78099  |
| Cl | -0.89654 | 2.75930  | 1.78099  |
| Cl | 2.34721  | 1.70535  | 1.78085  |
| Cl | 2.34721  | -1.70535 | 1.78085  |
| Cl | -0.89654 | -2.75930 | -1.78099 |
| Cl | 2.34721  | -1.70535 | -1.78085 |
| Cl | -2.90130 | 0.00000  | -1.78102 |
| Cl | -0.89654 | 2.75930  | -1.78099 |
| Cl | 2.34721  | 1.70535  | -1.78085 |

21  
Energy: -3918727.0422640

|    |          |          |          |
|----|----------|----------|----------|
| Fe | 0.00000  | 0.00000  | 0.00000  |
| C  | 0.36375  | 1.15569  | 1.64996  |
| C  | -0.98672 | 0.70307  | 1.64996  |
| C  | 1.21153  | 0.01118  | 1.64996  |
| C  | -0.97357 | -0.72116 | 1.64996  |
| C  | 0.38502  | -1.14878 | 1.64996  |
| C  | -1.21153 | 0.01118  | -1.64996 |
| C  | -0.36375 | 1.15569  | -1.64996 |

|    |          |          |          |
|----|----------|----------|----------|
| C  | -0.38502 | -1.14878 | -1.64996 |
| C  | 0.98672  | 0.70307  | -1.64996 |
| C  | 0.97357  | -0.72116 | -1.64996 |
| Cl | 2.33426  | -1.72896 | -1.74064 |
| Cl | 2.90471  | 0.02671  | 1.74064  |
| Cl | 2.36566  | 1.68574  | -1.74064 |
| Cl | 0.87220  | 2.77080  | 1.74064  |
| Cl | -0.87220 | 2.77080  | -1.74064 |
| Cl | -2.36566 | 1.68574  | 1.74064  |
| Cl | -2.90471 | 0.02671  | -1.74064 |
| Cl | -2.33426 | -1.72896 | 1.74064  |
| Cl | -0.92301 | -2.75429 | -1.74064 |
| Cl | 0.92301  | -2.75429 | 1.74064  |

21  
Energy: -2477147.7805727

|    |          |          |          |
|----|----------|----------|----------|
| Fe | 0.00000  | 0.00000  | 0.77770  |
| C  | 0.00000  | 1.21184  | -0.84823 |
| C  | 1.15253  | 0.37448  | -0.84823 |
| C  | -1.15253 | 0.37448  | -0.84823 |
| C  | 0.71230  | -0.98040 | -0.84823 |
| C  | -0.71230 | -0.98040 | -0.84823 |
| C  | 1.14848  | -0.37316 | 2.43682  |
| C  | 0.70980  | 0.97695  | 2.43682  |
| C  | 0.00000  | -1.20758 | 2.43682  |
| H  | 2.17437  | -0.70650 | 2.39281  |
| C  | -0.70980 | 0.97695  | 2.43682  |
| H  | 1.34384  | 1.84963  | 2.39281  |
| C  | -1.14848 | -0.37316 | 2.43682  |
| H  | 0.00000  | -2.28627 | 2.39281  |
| H  | -1.34384 | 1.84963  | 2.39281  |
| H  | -2.17437 | -0.70650 | 2.39281  |
| Cl | 0.00000  | 2.91056  | -0.93932 |
| Cl | 2.76811  | 0.89941  | -0.93932 |
| Cl | -2.76811 | 0.89941  | -0.93932 |
| Cl | -1.71079 | -2.35469 | -0.93932 |
| Cl | 1.71079  | -2.35469 | -0.93932 |

21  
Energy: -3918727.0410090

|    |          |          |          |
|----|----------|----------|----------|
| Fe | 0.00000  | 0.00000  | 0.00000  |
| C  | 0.00000  | 1.21158  | 1.65004  |
| C  | -1.15228 | 0.37440  | 1.65004  |
| C  | 1.15228  | 0.37440  | 1.65004  |
| C  | -0.71215 | -0.98018 | 1.65004  |
| C  | 0.71215  | -0.98018 | 1.65004  |
| C  | -1.15228 | -0.37440 | -1.65004 |
| C  | -0.71215 | 0.98018  | -1.65004 |
| C  | 0.00000  | -1.21158 | -1.65004 |
| C  | 0.71215  | 0.98018  | -1.65004 |
| C  | 1.15228  | -0.37440 | -1.65004 |
| Cl | 2.76261  | -0.89763 | -1.74134 |
| Cl | 2.76261  | 0.89763  | 1.74134  |
| Cl | 1.70739  | 2.35002  | -1.74134 |
| Cl | 0.00000  | 2.90478  | 1.74134  |
| Cl | -1.70739 | 2.35002  | -1.74134 |

|    |          |          |          |
|----|----------|----------|----------|
| C1 | -2.76261 | 0.89763  | 1.74134  |
| C1 | -2.76261 | -0.89763 | -1.74134 |
| C1 | -1.70739 | -2.35002 | 1.74134  |
| C1 | 0.00000  | -2.90478 | -1.74134 |
| C1 | 1.70739  | -2.35002 | 1.74134  |

21  
Energy: -2188834.5938432

|    |          |          |          |
|----|----------|----------|----------|
| Fe | 0.00000  | 0.00000  | 0.11152  |
| C  | 0.39867  | -1.71395 | 1.14658  |
| C  | 0.00000  | -2.02619 | -0.17958 |
| C  | 1.55787  | -0.90012 | 1.06182  |
| H  | -0.09856 | -2.00853 | 2.05770  |
| C  | 0.92125  | -1.40468 | -1.06260 |
| H  | -0.84961 | -2.62113 | -0.47561 |
| C  | 1.88554  | -0.69184 | -0.30371 |
| C  | -1.55787 | 0.90012  | 1.06182  |
| C  | -0.39867 | 1.71395  | 1.14658  |
| C  | -1.88554 | 0.69184  | -0.30371 |
| C  | 0.00000  | 2.02619  | -0.17958 |
| H  | 0.09856  | 2.00853  | 2.05770  |
| C  | -0.92125 | 1.40468  | -1.06260 |
| H  | -2.71188 | 0.11678  | -0.68880 |
| H  | 0.84961  | 2.62113  | -0.47561 |
| H  | 2.71188  | -0.11678 | -0.68880 |
| C1 | 2.45941  | -0.30705 | 2.39518  |
| C1 | 0.91797  | -1.55374 | -2.76683 |
| C1 | -0.91797 | 1.55374  | -2.76683 |
| C1 | -2.45941 | 0.30705  | 2.39518  |

21  
Energy: -2188834.9318010

|    |          |          |          |
|----|----------|----------|----------|
| Fe | 0.00000  | 0.00000  | 0.28835  |
| C  | 0.00000  | -2.01816 | 0.61832  |
| C  | -0.91207 | -1.37610 | 1.49662  |
| C  | -0.41039 | -1.72772 | -0.70888 |
| H  | 0.86517  | -2.59966 | 0.89641  |
| C  | -1.86963 | -0.69791 | 0.69730  |
| H  | -0.88590 | -1.38464 | 2.57485  |
| C  | -1.56460 | -0.90204 | -0.67367 |
| C  | 1.86963  | 0.69791  | 0.69730  |
| C  | 1.56460  | 0.90204  | -0.67367 |
| C  | 0.91207  | 1.37610  | 1.49662  |
| C  | 0.41039  | 1.72772  | -0.70888 |
| H  | 2.09588  | 0.49933  | -1.52111 |
| C  | 0.00000  | 2.01816  | 0.61832  |
| H  | 0.88590  | 1.38464  | 2.57485  |
| H  | -0.86517 | 2.59966  | 0.89641  |
| H  | -2.09588 | -0.49933 | -1.52111 |
| C1 | 3.21746  | -0.17937 | 1.29324  |
| C1 | -0.33455 | 2.32435  | -2.13306 |
| C1 | -3.21746 | 0.17937  | 1.29324  |
| C1 | 0.33455  | -2.32435 | -2.13306 |



Energy: -1612199.7214273

|    |          |          |          |
|----|----------|----------|----------|
| Fe | 0.46487  | 0.13697  | 0.00000  |
| C  | -0.94306 | 1.43634  | 0.71028  |
| C  | -0.94306 | 1.43634  | -0.71028 |
| C  | -1.21950 | 0.11122  | 1.13665  |
| H  | -0.75957 | 2.27938  | 1.35753  |
| C  | -1.21950 | 0.11122  | -1.13665 |
| H  | -0.75957 | 2.27938  | -1.35753 |
| C  | -1.38834 | -0.72257 | 0.00000  |
| C  | 2.28664  | 0.74813  | 0.71036  |
| C  | 2.00321  | -0.57197 | 1.14929  |
| C  | 2.28664  | 0.74813  | -0.71036 |
| H  | 2.44344  | 1.60690  | 1.34516  |
| C  | 1.82986  | -1.38779 | 0.00000  |
| H  | 1.89272  | -0.88944 | 2.17524  |
| C  | 2.00321  | -0.57197 | -1.14929 |
| H  | 2.44344  | 1.60690  | -1.34516 |
| H  | 1.57601  | -2.43688 | 0.00000  |
| H  | 1.89272  | -0.88944 | -2.17524 |
| H  | -1.60857 | -1.77763 | 0.00000  |
| Cl | -1.39364 | -0.39303 | 2.76859  |
| Cl | -1.39364 | -0.39303 | -2.76859 |

21

Energy: -2188833.9107866

|    |          |          |          |
|----|----------|----------|----------|
| Fe | 0.00000  | 0.00000  | 0.35260  |
| C  | -0.70989 | 1.64105  | 1.34735  |
| C  | 0.70989  | 1.64105  | 1.34735  |
| C  | -1.13752 | 1.66591  | -0.00529 |
| H  | -1.35759 | 1.62336  | 2.20970  |
| C  | 1.13752  | 1.66591  | -0.00529 |
| H  | 1.35759  | 1.62336  | 2.20970  |
| C  | 0.00000  | 1.66180  | -0.85352 |
| C  | -0.70989 | -1.64105 | 1.34735  |
| C  | -1.13752 | -1.66591 | -0.00529 |
| C  | 0.70989  | -1.64105 | 1.34735  |
| H  | -1.35759 | -1.62336 | 2.20970  |
| C  | 0.00000  | -1.66180 | -0.85352 |
| C  | 1.13752  | -1.66591 | -0.00529 |
| H  | 1.35759  | -1.62336 | 2.20970  |
| H  | 0.00000  | -1.67734 | -1.93132 |
| H  | 0.00000  | 1.67734  | -1.93132 |
| Cl | -2.76179 | -1.77250 | -0.53104 |
| Cl | -2.76179 | 1.77250  | -0.53104 |
| Cl | 2.76179  | 1.77250  | -0.53104 |
| Cl | 2.76179  | -1.77250 | -0.53104 |

21

Energy: -2188834.9318010

|    |         |         |          |
|----|---------|---------|----------|
| Fe | 0.00000 | 0.00000 | 0.28835  |
| C  | 1.86963 | 0.69791 | 0.69730  |
| C  | 1.56461 | 0.90205 | -0.67367 |
| C  | 0.91207 | 1.37609 | 1.49662  |
| C  | 0.41039 | 1.72772 | -0.70888 |
| C  | 0.00000 | 2.01816 | 0.61832  |
| H  | 0.88590 | 1.38463 | 2.57485  |

|    |          |          |          |
|----|----------|----------|----------|
| H  | -0.86517 | 2.59966  | 0.89642  |
| C  | -1.56461 | -0.90205 | -0.67367 |
| C  | -0.41039 | -1.72772 | -0.70888 |
| C  | -1.86963 | -0.69791 | 0.69730  |
| H  | -2.09587 | -0.49932 | -1.52112 |
| C  | 0.00000  | -2.01816 | 0.61832  |
| C  | -0.91207 | -1.37609 | 1.49662  |
| H  | 0.86517  | -2.59966 | 0.89642  |
| H  | -0.88590 | -1.38463 | 2.57485  |
| H  | 2.09587  | 0.49932  | -1.52112 |
| Cl | -0.33455 | 2.32436  | -2.13305 |
| Cl | -3.21746 | 0.17937  | 1.29324  |
| Cl | 0.33455  | -2.32436 | -2.13305 |
| Cl | 3.21746  | -0.17937 | 1.29324  |

21  
Energy: -2188834.1190319

|    |          |          |          |
|----|----------|----------|----------|
| Fe | 0.00000  | 0.00000  | 0.00000  |
| C  | -0.44321 | 1.63899  | 1.13707  |
| C  | 0.31272  | 2.02643  | 0.00000  |
| C  | -1.63675 | 1.00349  | 0.71053  |
| C  | -0.44321 | 1.63899  | -1.13707 |
| C  | -1.63675 | 1.00349  | -0.71053 |
| H  | -2.39000 | 0.58378  | 1.35881  |
| H  | -2.39000 | 0.58378  | -1.35881 |
| C  | 1.63675  | -1.00349 | -0.71053 |
| C  | 1.63675  | -1.00349 | 0.71053  |
| C  | 0.44321  | -1.63899 | -1.13707 |
| H  | 2.39000  | -0.58378 | -1.35881 |
| C  | 0.44321  | -1.63899 | 1.13707  |
| H  | 2.39000  | -0.58378 | 1.35881  |
| C  | -0.31272 | -2.02643 | 0.00000  |
| H  | -1.26717 | -2.52729 | 0.00000  |
| H  | 1.26717  | 2.52729  | 0.00000  |
| Cl | 0.00000  | 1.93573  | 2.76486  |
| Cl | 0.00000  | -1.93573 | 2.76486  |
| Cl | 0.00000  | -1.93573 | -2.76486 |
| Cl | 0.00000  | 1.93573  | -2.76486 |

21  
Energy: -1612199.2318382

|    |          |          |          |
|----|----------|----------|----------|
| Fe | 0.46121  | -0.13953 | 0.00000  |
| C  | -1.22558 | -0.11118 | 1.13624  |
| C  | -1.39230 | 0.72300  | 0.00000  |
| C  | -0.95242 | -1.43649 | 0.71017  |
| C  | -1.22558 | -0.11118 | -1.13624 |
| C  | -0.95242 | -1.43649 | -0.71017 |
| H  | -0.76737 | -2.27924 | 1.35745  |
| H  | -0.76737 | -2.27924 | -1.35745 |
| C  | 1.87676  | 1.16010  | -0.71043 |
| C  | 1.87676  | 1.16010  | 0.71043  |
| C  | 2.16072  | -0.15890 | -1.14892 |
| H  | 1.65865  | 2.00466  | -1.34642 |
| C  | 2.16072  | -0.15890 | 1.14892  |
| H  | 1.65865  | 2.00466  | 1.34642  |
| C  | 2.33461  | -0.97523 | 0.00000  |

|    |          |          |          |
|----|----------|----------|----------|
| H  | 2.19506  | -0.49043 | -2.17572 |
| H  | 2.19506  | -0.49043 | 2.17572  |
| H  | 2.53283  | -2.03636 | 0.00000  |
| H  | -1.60582 | 1.77950  | 0.00000  |
| Cl | -1.38408 | 0.39664  | 2.76822  |
| Cl | -1.38408 | 0.39664  | -2.76822 |

21  
Energy: -2188834.9318010

|    |          |          |          |
|----|----------|----------|----------|
| Fe | 0.00000  | 0.00000  | 0.28835  |
| C  | -1.86964 | -0.69791 | 0.69729  |
| C  | -1.56460 | -0.90205 | -0.67368 |
| C  | -0.91208 | -1.37608 | 1.49662  |
| C  | -0.41038 | -1.72772 | -0.70887 |
| C  | 0.00000  | -2.01815 | 0.61833  |
| H  | -0.88593 | -1.38461 | 2.57485  |
| H  | 0.86516  | -2.59965 | 0.89645  |
| C  | 0.41038  | 1.72772  | -0.70887 |
| C  | 0.00000  | 2.01815  | 0.61833  |
| C  | 1.56460  | 0.90205  | -0.67368 |
| C  | 0.91208  | 1.37608  | 1.49662  |
| H  | -0.86516 | 2.59965  | 0.89645  |
| C  | 1.86964  | 0.69791  | 0.69729  |
| H  | 2.09586  | 0.49935  | -1.52114 |
| H  | 0.88593  | 1.38461  | 2.57485  |
| H  | -2.09586 | -0.49935 | -1.52114 |
| Cl | -3.21746 | 0.17938  | 1.29323  |
| Cl | -0.33458 | 2.32437  | -2.13304 |
| Cl | 3.21746  | -0.17938 | 1.29323  |
| Cl | 0.33458  | -2.32437 | -2.13304 |

21  
Energy: -2765465.8079918

|    |          |          |          |
|----|----------|----------|----------|
| Fe | 0.00000  | 0.00000  | 0.57987  |
| C  | -0.79105 | -1.42284 | 1.80911  |
| C  | -1.76865 | -0.97776 | 0.88266  |
| C  | 0.29817  | -1.95601 | 1.07178  |
| H  | -0.84447 | -1.35985 | 2.88461  |
| C  | -1.28558 | -1.24302 | -0.42450 |
| H  | -2.70699 | -0.49823 | 1.11438  |
| C  | 0.00000  | -1.84825 | -0.31683 |
| C  | 0.79105  | 1.42284  | 1.80911  |
| C  | 1.76865  | 0.97776  | 0.88266  |
| C  | -0.29817 | 1.95601  | 1.07178  |
| H  | 0.84447  | 1.35985  | 2.88461  |
| C  | 1.28558  | 1.24302  | -0.42450 |
| H  | 2.70699  | 0.49823  | 1.11438  |
| C  | 0.00000  | 1.84825  | -0.31683 |
| Cl | 1.69245  | -2.68933 | 1.73027  |
| Cl | 0.94073  | -2.44571 | -1.59604 |
| Cl | -2.12902 | -0.97794 | -1.87956 |
| Cl | -1.69245 | 2.68933  | 1.73027  |
| Cl | -0.94073 | 2.44571  | -1.59604 |
| Cl | 2.12902  | 0.97794  | -1.87956 |

21  
Energy: -2765466.2087570

|    |          |          |          |
|----|----------|----------|----------|
| Fe | 0.00000  | 0.00000  | 0.19775  |
| C  | 1.55811  | 0.89532  | 1.16314  |
| C  | 1.88163  | 0.69125  | -0.20276 |
| C  | 0.40219  | 1.71614  | 1.22009  |
| H  | 2.06974  | 0.47963  | 2.01734  |
| C  | 0.92980  | 1.39068  | -0.98889 |
| H  | 2.69089  | 0.09292  | -0.59172 |
| C  | 0.00000  | 2.02148  | -0.11248 |
| C  | -0.40219 | -1.71614 | 1.22009  |
| C  | -1.55811 | -0.89532 | 1.16314  |
| C  | 0.00000  | -2.02148 | -0.11248 |
| C  | -1.88163 | -0.69125 | -0.20276 |
| H  | -2.06974 | -0.47963 | 2.01734  |
| C  | -0.92980 | -1.39068 | -0.98889 |
| H  | -2.69089 | -0.09292 | -0.59172 |
| Cl | 0.93910  | 1.53661  | -2.68516 |
| Cl | -1.27522 | 3.05002  | -0.56795 |
| Cl | -0.34051 | 2.31164  | 2.63717  |
| Cl | -0.93910 | -1.53661 | -2.68516 |
| Cl | 1.27522  | -3.05002 | -0.56795 |
| Cl | 0.34051  | -2.31164 | 2.63717  |

21  
Energy: -1900515.9437590

|    |          |          |          |
|----|----------|----------|----------|
| Fe | -0.15570 | -0.76629 | 0.00000  |
| C  | -1.85065 | 0.12355  | -0.70970 |
| C  | -1.85065 | 0.12355  | 0.70970  |
| C  | -0.69483 | 0.82142  | -1.14668 |
| H  | -2.58514 | -0.33037 | -1.35612 |
| C  | -0.69483 | 0.82142  | 1.14668  |
| H  | -2.58514 | -0.33037 | 1.35612  |
| C  | 0.03071  | 1.25698  | 0.00000  |
| C  | -0.11517 | -2.68932 | -0.71038 |
| C  | 1.03110  | -1.97520 | -1.14886 |
| C  | -0.11517 | -2.68932 | 0.71038  |
| H  | -0.86991 | -3.12791 | -1.34522 |
| C  | 1.73920  | -1.53456 | 0.00000  |
| H  | 1.29201  | -1.76193 | -2.17455 |
| C  | 1.03110  | -1.97520 | 1.14886  |
| H  | -0.86991 | -3.12791 | 1.34522  |
| H  | 2.63122  | -0.92631 | 0.00000  |
| H  | 1.29201  | -1.76193 | 2.17455  |
| Cl | -0.28405 | 1.16985  | -2.76880 |
| Cl | 1.43151  | 2.22443  | 0.00000  |
| Cl | -0.28405 | 1.16985  | 2.76880  |

21  
Energy: -2765465.2346176

|    |          |         |         |
|----|----------|---------|---------|
| Fe | 0.00000  | 0.00000 | 0.77237 |
| C  | 0.70943  | 1.63151 | 1.77618 |
| C  | -0.70943 | 1.63151 | 1.77618 |
| C  | 1.14674  | 1.66492 | 0.42711 |
| H  | 1.35662  | 1.60686 | 2.63879 |
| C  | -1.14674 | 1.66492 | 0.42711 |

|    |          |          |          |
|----|----------|----------|----------|
| H  | -1.35662 | 1.60686  | 2.63879  |
| C  | 0.00000  | 1.67641  | -0.41778 |
| C  | 0.70943  | -1.63151 | 1.77618  |
| C  | 1.14674  | -1.66492 | 0.42711  |
| C  | -0.70943 | -1.63151 | 1.77618  |
| H  | 1.35662  | -1.60686 | 2.63879  |
| C  | 0.00000  | -1.67641 | -0.41778 |
| C  | -1.14674 | -1.66492 | 0.42711  |
| H  | -1.35662 | -1.60686 | 2.63879  |
| Cl | 2.76129  | 1.78400  | -0.10052 |
| Cl | 0.00000  | 1.82191  | -2.10786 |
| Cl | -2.76129 | 1.78400  | -0.10052 |
| Cl | -2.76129 | -1.78400 | -0.10052 |
| Cl | 0.00000  | -1.82191 | -2.10786 |
| Cl | 2.76129  | -1.78400 | -0.10052 |

21  
Energy: -2765466.2087570

|    |          |          |          |
|----|----------|----------|----------|
| Fe | 0.00000  | 0.00000  | 0.19777  |
| C  | -0.40215 | 1.71615  | 1.22009  |
| C  | 0.00000  | 2.02147  | -0.11249 |
| C  | -1.55808 | 0.89533  | 1.16319  |
| C  | -0.92983 | 1.39067  | -0.98886 |
| C  | -1.88164 | 0.69126  | -0.20271 |
| H  | -2.06970 | 0.47964  | 2.01739  |
| H  | -2.69092 | 0.09292  | -0.59162 |
| C  | 0.92983  | -1.39067 | -0.98886 |
| C  | 1.88164  | -0.69126 | -0.20271 |
| C  | 0.00000  | -2.02147 | -0.11249 |
| C  | 1.55808  | -0.89533 | 1.16319  |
| H  | 2.69092  | -0.09292 | -0.59162 |
| C  | 0.40215  | -1.71615 | 1.22009  |
| H  | 2.06970  | -0.47964 | 2.01739  |
| Cl | 0.34061  | 2.31165  | 2.63715  |
| Cl | 1.27519  | 3.05003  | -0.56801 |
| Cl | 0.93915  | -1.53658 | -2.68514 |
| Cl | -1.27519 | -3.05003 | -0.56801 |
| Cl | -0.34061 | -2.31165 | 2.63715  |
| Cl | -0.93915 | 1.53658  | -2.68514 |

21  
Energy: -2765466.1211943

|    |          |          |          |
|----|----------|----------|----------|
| Fe | 0.00000  | 0.00000  | 0.00000  |
| C  | -0.44059 | 1.63304  | 1.14695  |
| C  | 0.31075  | 2.02014  | 0.00000  |
| C  | -1.63384 | 1.00304  | 0.70952  |
| C  | -0.44059 | 1.63304  | -1.14695 |
| C  | -1.63384 | 1.00304  | -0.70952 |
| H  | -2.38643 | 0.57812  | 1.35536  |
| H  | -2.38643 | 0.57812  | -1.35536 |
| C  | 1.63384  | -1.00304 | -0.70952 |
| C  | 1.63384  | -1.00304 | 0.70952  |
| C  | 0.44059  | -1.63304 | -1.14695 |
| H  | 2.38643  | -0.57812 | -1.35536 |
| C  | 0.44059  | -1.63304 | 1.14695  |
| H  | 2.38643  | -0.57812 | 1.35536  |

|    |          |          |          |
|----|----------|----------|----------|
| C  | -0.31075 | -2.02014 | 0.00000  |
| C1 | 0.00000  | -1.94113 | -2.76493 |
| C1 | -1.77836 | -2.87866 | 0.00000  |
| C1 | 0.00000  | -1.94113 | 2.76493  |
| C1 | 1.77836  | 2.87866  | 0.00000  |
| C1 | 0.00000  | 1.94113  | 2.76493  |
| C1 | 0.00000  | 1.94113  | -2.76493 |

21  
Energy: -1900515.5108151

|    |          |          |          |
|----|----------|----------|----------|
| Fe | 0.16153  | 0.76237  | 0.00000  |
| C  | 0.69924  | -0.82749 | 1.14636  |
| C  | -0.02746 | -1.26090 | 0.00000  |
| C  | 1.85672  | -0.13318 | 0.70953  |
| C  | 0.69924  | -0.82749 | -1.14636 |
| C  | 1.85672  | -0.13318 | -0.70953 |
| H  | 2.59101  | 0.32122  | 1.35593  |
| H  | 2.59101  | 0.32122  | -1.35593 |
| C  | -1.54196 | 1.64860  | -0.71005 |
| C  | -1.54196 | 1.64860  | 0.71005  |
| C  | -0.39974 | 2.36761  | -1.14873 |
| H  | -2.25789 | 1.14774  | -1.34416 |
| C  | -0.39974 | 2.36761  | 1.14873  |
| H  | -2.25789 | 1.14774  | 1.34416  |
| C  | 0.30691  | 2.81164  | 0.00000  |
| H  | -0.09952 | 2.51317  | -2.17542 |
| H  | -0.09952 | 2.51317  | 2.17542  |
| H  | 1.23609  | 3.36115  | 0.00000  |
| C1 | -1.43930 | -2.21154 | 0.00000  |
| C1 | 0.27992  | -1.16240 | 2.76874  |
| C1 | 0.27992  | -1.16240 | -2.76874 |

21  
Energy: -2765465.8079918

|    |          |          |          |
|----|----------|----------|----------|
| Fe | 0.00000  | 0.00000  | 0.57986  |
| C  | -0.29815 | -1.95601 | 1.07179  |
| C  | 0.00000  | -1.84825 | -0.31683 |
| C  | 0.79107  | -1.42284 | 1.80910  |
| C  | 1.28558  | -1.24302 | -0.42451 |
| C  | 1.76866  | -0.97776 | 0.88265  |
| H  | 0.84449  | -1.35981 | 2.88461  |
| H  | 2.70700  | -0.49822 | 1.11435  |
| C  | 0.00000  | 1.84825  | -0.31683 |
| C  | -1.28558 | 1.24302  | -0.42451 |
| C  | 0.29815  | 1.95601  | 1.07179  |
| C  | -1.76866 | 0.97776  | 0.88265  |
| C  | -0.79107 | 1.42284  | 1.80910  |
| H  | -2.70700 | 0.49822  | 1.11435  |
| H  | -0.84449 | 1.35981  | 2.88461  |
| C1 | -1.69243 | -2.68933 | 1.73029  |
| C1 | -2.12900 | 0.97795  | -1.87957 |
| C1 | -0.94074 | -2.44572 | -1.59603 |
| C1 | 2.12900  | -0.97795 | -1.87957 |
| C1 | 1.69243  | 2.68933  | 1.73029  |
| C1 | 0.94074  | 2.44572  | -1.59603 |

21  
 Energy: -1612199.8905097

|    |          |          |          |
|----|----------|----------|----------|
| Fe | 0.00000  | 0.00000  | 0.58776  |
| C  | -0.71032 | -1.49880 | 1.78663  |
| C  | -1.73176 | -1.03605 | 0.91408  |
| C  | 0.36953  | -1.97277 | 0.99574  |
| H  | -0.73704 | -1.47300 | 2.86529  |
| C  | -1.29270 | -1.21866 | -0.42362 |
| H  | -2.67000 | -0.59408 | 1.21280  |
| C  | 0.00000  | -1.80046 | -0.36375 |
| H  | 1.30492  | -2.38046 | 1.34516  |
| H  | -1.81753 | -0.94382 | -1.32530 |
| C  | 0.71032  | 1.49880  | 1.78663  |
| C  | 1.73176  | 1.03605  | 0.91408  |
| C  | -0.36953 | 1.97277  | 0.99574  |
| H  | 0.73704  | 1.47300  | 2.86529  |
| C  | 1.29270  | 1.21866  | -0.42362 |
| H  | 2.67000  | 0.59408  | 1.21280  |
| C  | 0.00000  | 1.80046  | -0.36375 |
| H  | -1.30492 | 2.38046  | 1.34516  |
| H  | 1.81753  | 0.94382  | -1.32530 |
| Cl | 0.94376  | -2.27607 | -1.71725 |
| Cl | -0.94376 | 2.27607  | -1.71725 |

21  
 Energy: -1612199.9998972

|    |          |          |          |
|----|----------|----------|----------|
| Fe | 0.00000  | 0.00000  | 0.23263  |
| C  | 0.36607  | -1.75987 | 1.20721  |
| C  | 0.00000  | -2.00843 | -0.14213 |
| C  | 1.53008  | -0.94584 | 1.21154  |
| H  | -0.16415 | -2.10504 | 2.08162  |
| C  | 0.93484  | -1.35184 | -0.98510 |
| H  | -0.86506 | -2.56297 | -0.47320 |
| C  | 1.87512  | -0.70240 | -0.14323 |
| H  | 2.05844  | -0.56698 | 2.07210  |
| H  | 0.93603  | -1.32880 | -2.06340 |
| C  | -1.53008 | 0.94584  | 1.21154  |
| C  | -0.36607 | 1.75987  | 1.20721  |
| C  | -1.87512 | 0.70240  | -0.14323 |
| H  | -2.05844 | 0.56698  | 2.07210  |
| C  | 0.00000  | 2.00843  | -0.14213 |
| H  | 0.16415  | 2.10504  | 2.08162  |
| C  | -0.93484 | 1.35184  | -0.98510 |
| H  | 0.86506  | 2.56297  | -0.47320 |
| H  | -0.93603 | 1.32880  | -2.06340 |
| Cl | 3.24686  | 0.18230  | -0.67830 |
| Cl | -3.24686 | -0.18230 | -0.67830 |

21  
 Energy: -1323881.7491475

|    |          |          |          |
|----|----------|----------|----------|
| Fe | -0.24014 | -0.42642 | 0.00000  |
| C  | 1.41781  | -1.38955 | 0.71029  |
| C  | 1.41781  | -1.38955 | -0.71029 |
| C  | 1.40246  | -0.04123 | 1.15613  |
| H  | 1.40592  | -2.26257 | 1.34479  |

|    |          |          |          |
|----|----------|----------|----------|
| C  | 1.40246  | -0.04123 | -1.15613 |
| H  | 1.40592  | -2.26257 | -1.34479 |
| C  | 1.39609  | 0.78174  | 0.00000  |
| H  | 1.38781  | 0.30881  | 2.17618  |
| H  | 1.38781  | 0.30881  | -2.17618 |
| C  | -1.89267 | -1.40685 | 0.71012  |
| C  | -1.89267 | -0.05568 | 1.14852  |
| C  | -1.89267 | -1.40685 | -0.71012 |
| H  | -1.86902 | -2.27982 | 1.34454  |
| C  | -1.89147 | 0.77906  | 0.00000  |
| H  | -1.86652 | 0.27858  | 2.17452  |
| C  | -1.89267 | -0.05568 | -1.14852 |
| H  | -1.86902 | -2.27982 | -1.34454 |
| H  | -1.84929 | 1.85790  | 0.00000  |
| H  | -1.86652 | 0.27858  | -2.17452 |
| Cl | 1.44292  | 2.49965  | 0.00000  |

21

Energy: -1612199.2180769

|    |          |          |          |
|----|----------|----------|----------|
| Fe | 0.00000  | 0.00000  | 0.72166  |
| C  | -0.71030 | 1.63759  | 1.71481  |
| C  | 0.71030  | 1.63759  | 1.71481  |
| C  | -1.15502 | 1.65545  | 0.36654  |
| H  | -1.34497 | 1.60247  | 2.58712  |
| C  | 1.15502  | 1.65545  | 0.36654  |
| H  | 1.34497  | 1.60247  | 2.58712  |
| C  | 0.00000  | 1.67682  | -0.45713 |
| H  | -2.17489 | 1.65043  | 0.01557  |
| H  | 2.17489  | 1.65043  | 0.01557  |
| C  | -0.71030 | -1.63759 | 1.71481  |
| C  | -1.15502 | -1.65545 | 0.36654  |
| C  | 0.71030  | -1.63759 | 1.71481  |
| H  | -1.34497 | -1.60247 | 2.58712  |
| C  | 0.00000  | -1.67682 | -0.45713 |
| H  | -2.17489 | -1.65043 | 0.01557  |
| C  | 1.15502  | -1.65545 | 0.36654  |
| H  | 1.34497  | -1.60247 | 2.58712  |
| H  | 2.17489  | -1.65043 | 0.01557  |
| Cl | 0.00000  | 1.79570  | -2.16591 |
| Cl | 0.00000  | -1.79570 | -2.16591 |

21

Energy: -1612199.8905097

|    |          |          |          |
|----|----------|----------|----------|
| Fe | 0.00000  | 0.00000  | 0.58777  |
| C  | 0.00000  | -1.80045 | -0.36376 |
| C  | 0.36955  | -1.97278 | 0.99572  |
| C  | -1.29271 | -1.21865 | -0.42360 |
| C  | -0.71030 | -1.49883 | 1.78663  |
| H  | 1.30495  | -2.38045 | 1.34512  |
| C  | -1.73175 | -1.03607 | 0.91411  |
| H  | -1.81755 | -0.94381 | -1.32527 |
| H  | -0.73700 | -1.47302 | 2.86529  |
| H  | -2.66999 | -0.59411 | 1.21284  |
| C  | 0.71030  | 1.49883  | 1.78663  |
| C  | 1.73175  | 1.03607  | 0.91411  |
| C  | -0.36955 | 1.97278  | 0.99572  |



|    |          |          |          |
|----|----------|----------|----------|
| H  | 0.73700  | 1.47302  | 2.86529  |
| C  | 1.29271  | 1.21865  | -0.42360 |
| H  | 2.66999  | 0.59411  | 1.21284  |
| C  | 0.00000  | 1.80045  | -0.36376 |
| H  | -1.30495 | 2.38045  | 1.34512  |
| H  | 1.81755  | 0.94381  | -1.32527 |
| Cl | 0.94377  | -2.27602 | -1.71727 |
| Cl | -0.94377 | 2.27602  | -1.71727 |

21  
Energy: -1612199.5029724

|    |          |          |          |
|----|----------|----------|----------|
| Fe | 0.00000  | 0.00000  | 0.00000  |
| C  | -0.80184 | 1.87641  | 0.00000  |
| C  | 0.00000  | 1.69195  | 1.15546  |
| C  | 0.00000  | 1.69195  | -1.15546 |
| C  | 1.31595  | 1.39731  | 0.70951  |
| H  | -0.34514 | 1.75320  | 2.17554  |
| C  | 1.31595  | 1.39731  | -0.70951 |
| H  | -0.34514 | 1.75320  | -2.17554 |
| H  | 2.16132  | 1.17348  | 1.34226  |
| H  | 2.16132  | 1.17348  | -1.34226 |
| C  | 0.00000  | -1.69195 | 1.15546  |
| C  | -1.31595 | -1.39731 | 0.70951  |
| C  | 0.80184  | -1.87641 | 0.00000  |
| H  | 0.34514  | -1.75320 | 2.17554  |
| C  | -1.31595 | -1.39731 | -0.70951 |
| H  | -2.16132 | -1.17348 | 1.34226  |
| C  | 0.00000  | -1.69195 | -1.15546 |
| H  | -2.16132 | -1.17348 | -1.34226 |
| H  | 0.34514  | -1.75320 | -2.17554 |
| Cl | -2.46676 | 2.29759  | 0.00000  |
| Cl | 2.46676  | -2.29759 | 0.00000  |

21  
Energy: -1323881.1856628

|    |          |          |          |
|----|----------|----------|----------|
| Fe | -0.23610 | -0.42913 | 0.00000  |
| C  | 1.39767  | 0.78530  | 0.00000  |
| C  | 1.40798  | -0.03728 | 1.15584  |
| C  | 1.40798  | -0.03728 | -1.15584 |
| C  | 1.43014  | -1.38513 | 0.71000  |
| H  | 1.38766  | 0.31258  | 2.17592  |
| C  | 1.43014  | -1.38513 | -0.71000 |
| H  | 1.38766  | 0.31258  | -2.17592 |
| H  | 1.41948  | -2.25824 | 1.34452  |
| H  | 1.41948  | -2.25824 | -1.34452 |
| C  | -1.89212 | -0.80630 | 1.14842  |
| C  | -1.89212 | 0.54446  | 0.70948  |
| C  | -1.89308 | -1.64086 | 0.00000  |
| H  | -1.86425 | -1.13990 | 2.17470  |
| C  | -1.89212 | 0.54446  | -0.70948 |
| H  | -1.85630 | 1.41872  | 1.34175  |
| C  | -1.89212 | -0.80630 | -1.14842 |
| H  | -1.86561 | -2.72002 | 0.00000  |
| H  | -1.85630 | 1.41872  | -1.34175 |
| H  | -1.86425 | -1.13990 | -2.17470 |
| Cl | 1.42100  | 2.50326  | 0.00000  |

21  
 Energy: -1612199.8905097

|    |          |          |          |
|----|----------|----------|----------|
| Fe | 0.00000  | 0.00000  | 0.58776  |
| C  | 0.00000  | -1.80047 | -0.36376 |
| C  | 0.36956  | -1.97278 | 0.99572  |
| C  | -1.29270 | -1.21866 | -0.42362 |
| C  | -0.71029 | -1.49882 | 1.78662  |
| H  | 1.30495  | -2.38049 | 1.34511  |
| C  | -1.73174 | -1.03607 | 0.91409  |
| H  | -1.81755 | -0.94385 | -1.32529 |
| H  | -0.73703 | -1.47299 | 2.86528  |
| H  | -2.66996 | -0.59408 | 1.21284  |
| C  | 1.73174  | 1.03607  | 0.91409  |
| C  | 1.29270  | 1.21866  | -0.42362 |
| C  | 0.71029  | 1.49882  | 1.78662  |
| H  | 2.66996  | 0.59408  | 1.21284  |
| C  | 0.00000  | 1.80047  | -0.36376 |
| H  | 1.81755  | 0.94385  | -1.32529 |
| C  | -0.36956 | 1.97278  | 0.99572  |
| H  | 0.73703  | 1.47299  | 2.86528  |
| H  | -1.30495 | 2.38049  | 1.34511  |
| Cl | 0.94379  | -2.27606 | -1.71725 |
| Cl | -0.94379 | 2.27606  | -1.71725 |

21  
 Energy: -2765467.0131865

|    |          |          |          |
|----|----------|----------|----------|
| Fe | 0.00000  | 0.00000  | 0.22421  |
| C  | 0.36893  | 1.72948  | 1.24663  |
| C  | 1.53506  | 0.92307  | 1.18939  |
| C  | 0.00000  | 2.01751  | -0.09389 |
| H  | -0.14910 | 2.05307  | 2.13539  |
| C  | 1.88576  | 0.69433  | -0.16589 |
| C  | 0.93540  | 1.38623  | -0.96297 |
| C  | -1.53506 | -0.92307 | 1.18939  |
| C  | -1.88576 | -0.69433 | -0.16589 |
| C  | -0.36893 | -1.72948 | 1.24663  |
| C  | -0.93540 | -1.38623 | -0.96297 |
| H  | -2.71348 | -0.10512 | -0.52735 |
| C  | 0.00000  | -2.01751 | -0.09389 |
| H  | 0.14910  | -2.05307 | 2.13539  |
| H  | 2.71348  | 0.10512  | -0.52735 |
| Cl | 1.28796  | -3.02493 | -0.58147 |
| Cl | -0.96286 | -1.52119 | -2.65965 |
| Cl | -2.41505 | -0.35970 | 2.54686  |
| Cl | 0.96286  | 1.52119  | -2.65965 |
| Cl | 2.41505  | 0.35970  | 2.54686  |
| Cl | -1.28796 | 3.02493  | -0.58147 |

21  
 Energy: -2765466.6546401

|    |          |         |          |
|----|----------|---------|----------|
| Fe | 0.00000  | 0.00000 | 0.13274  |
| C  | -1.59271 | 0.87498 | -0.80390 |
| C  | -1.86115 | 0.72495 | 0.58070  |
| C  | -0.43785 | 1.69306 | -0.91591 |

|    |          |          |          |
|----|----------|----------|----------|
| H  | -2.15175 | 0.44456  | -1.61956 |
| C  | -0.87591 | 1.41929  | 1.32906  |
| C  | 0.00000  | 2.03359  | 0.39601  |
| C  | 0.43785  | -1.69306 | -0.91591 |
| C  | 1.59271  | -0.87498 | -0.80390 |
| C  | 0.00000  | -2.03359 | 0.39601  |
| C  | 1.86115  | -0.72495 | 0.58070  |
| H  | 2.15175  | -0.44456 | -1.61956 |
| C  | 0.87591  | -1.41929 | 1.32906  |
| H  | 0.81328  | -1.48834 | 2.40310  |
| H  | -0.81328 | 1.48834  | 2.40310  |
| Cl | 3.20233  | 0.09981  | 1.24483  |
| Cl | 1.28799  | 3.08135  | 0.77337  |
| Cl | -0.25403 | -2.25106 | -2.37260 |
| Cl | -1.28799 | -3.08135 | 0.77337  |
| Cl | -3.20233 | -0.09981 | 1.24483  |
| Cl | 0.25403  | 2.25106  | -2.37260 |

21  
Energy: -1900516.5060514

|    |          |          |          |
|----|----------|----------|----------|
| Fe | 0.48689  | 0.36200  | 0.00000  |
| C  | -1.18819 | 0.24225  | 1.15905  |
| C  | -1.43319 | 1.02326  | 0.00000  |
| C  | -0.79178 | -1.04688 | 0.71201  |
| H  | -1.28945 | 0.55974  | 2.18420  |
| C  | -1.18819 | 0.24225  | -1.15905 |
| C  | -0.79178 | -1.04688 | -0.71201 |
| C  | 1.96081  | 1.20267  | 1.14837  |
| C  | 2.35325  | -0.08978 | 0.70972  |
| C  | 1.71627  | 2.00130  | 0.00000  |
| H  | 1.83611  | 1.51311  | 2.17457  |
| C  | 2.35325  | -0.08978 | -0.70972 |
| H  | 2.56638  | -0.93747 | 1.34343  |
| C  | 1.96081  | 1.20267  | -1.14837 |
| H  | 1.36238  | 3.02125  | 0.00000  |
| H  | 2.56638  | -0.93747 | -1.34343 |
| H  | 1.83611  | 1.51311  | -2.17457 |
| H  | -1.28945 | 0.55974  | -2.18420 |
| Cl | -0.46631 | -2.39526 | 1.71019  |
| Cl | -2.00592 | 2.64046  | 0.00000  |
| Cl | -0.46631 | -2.39526 | -1.71019 |

21  
Energy: -2765466.2256433

|    |          |          |          |
|----|----------|----------|----------|
| Fe | 0.00000  | 0.00000  | 0.29766  |
| C  | -1.15688 | 1.64743  | 0.67993  |
| C  | 0.00000  | 1.65759  | 1.50023  |
| C  | -0.71176 | 1.66470  | -0.66820 |
| H  | -2.18229 | 1.65077  | 1.01277  |
| C  | 1.15688  | 1.64743  | 0.67993  |
| C  | 0.71176  | 1.66470  | -0.66820 |
| C  | -1.15688 | -1.64743 | 0.67993  |
| C  | -0.71176 | -1.66470 | -0.66820 |
| C  | 0.00000  | -1.65759 | 1.50023  |
| H  | -2.18229 | -1.65077 | 1.01277  |
| C  | 0.71176  | -1.66470 | -0.66820 |

|    |          |          |          |
|----|----------|----------|----------|
| C  | 1.15688  | -1.64743 | 0.67993  |
| H  | 2.18229  | -1.65077 | 1.01277  |
| H  | 2.18229  | 1.65077  | 1.01277  |
| Cl | 0.00000  | -1.75678 | 3.20613  |
| Cl | -1.70575 | -1.78205 | -2.04534 |
| Cl | 1.70575  | -1.78205 | -2.04534 |
| Cl | 1.70575  | 1.78205  | -2.04534 |
| Cl | -1.70575 | 1.78205  | -2.04534 |
| Cl | 0.00000  | 1.75678  | 3.20613  |

21

Energy: -2765467.0131865

|    |          |          |          |
|----|----------|----------|----------|
| Fe | 0.00000  | 0.00000  | 0.22421  |
| C  | 0.36892  | -1.72948 | 1.24663  |
| C  | 0.00000  | -2.01751 | -0.09390 |
| C  | 1.53505  | -0.92308 | 1.18939  |
| C  | 0.93541  | -1.38624 | -0.96297 |
| C  | 1.88576  | -0.69435 | -0.16588 |
| H  | 2.71349  | -0.10514 | -0.52734 |
| C  | -1.88576 | 0.69435  | -0.16588 |
| C  | -1.53505 | 0.92308  | 1.18939  |
| C  | -0.93541 | 1.38624  | -0.96297 |
| H  | -2.71349 | 0.10514  | -0.52734 |
| C  | -0.36892 | 1.72948  | 1.24663  |
| C  | 0.00000  | 2.01751  | -0.09390 |
| H  | 0.14912  | 2.05307  | 2.13539  |
| H  | -0.14912 | -2.05307 | 2.13539  |
| Cl | -2.41501 | 0.35968  | 2.54687  |
| Cl | -0.96286 | 1.52120  | -2.65965 |
| Cl | 1.28796  | 3.02493  | -0.58148 |
| Cl | -1.28796 | -3.02493 | -0.58148 |
| Cl | 2.41501  | -0.35968 | 2.54687  |
| Cl | 0.96286  | -1.52120 | -2.65965 |

21

Energy: -2765466.4203846

|    |          |          |          |
|----|----------|----------|----------|
| Fe | 0.00000  | 0.00000  | 0.00000  |
| C  | 0.00000  | 1.68967  | 1.15748  |
| C  | 1.31621  | 1.39422  | 0.71141  |
| C  | -0.79580 | 1.88414  | 0.00000  |
| C  | 1.31621  | 1.39422  | -0.71141 |
| C  | 0.00000  | 1.68967  | -1.15748 |
| H  | -0.32747 | 1.75815  | -2.18246 |
| C  | 0.79580  | -1.88414 | 0.00000  |
| C  | 0.00000  | -1.68967 | 1.15748  |
| C  | 0.00000  | -1.68967 | -1.15748 |
| C  | -1.31621 | -1.39422 | 0.71141  |
| H  | 0.32747  | -1.75815 | 2.18246  |
| C  | -1.31621 | -1.39422 | -0.71141 |
| H  | 0.32747  | -1.75815 | -2.18246 |
| H  | -0.32747 | 1.75815  | 2.18246  |
| Cl | 2.44660  | -2.32797 | 0.00000  |
| Cl | 2.67863  | 1.15382  | 1.70770  |
| Cl | -2.44660 | 2.32797  | 0.00000  |
| Cl | -2.67863 | -1.15382 | 1.70770  |
| Cl | -2.67863 | -1.15382 | -1.70770 |

|    |         |         |          |
|----|---------|---------|----------|
| C1 | 2.67863 | 1.15382 | -1.70770 |
|----|---------|---------|----------|

21

Energy: -1900516.0829594

|    |          |          |          |
|----|----------|----------|----------|
| Fe | -0.48393 | 0.35847  | 0.00000  |
| C  | 1.19398  | 0.24768  | 1.15883  |
| C  | 0.80437  | -1.04327 | 0.71176  |
| C  | 1.43471  | 1.02956  | 0.00000  |
| C  | 0.80437  | -1.04327 | -0.71176 |
| C  | 1.19398  | 0.24768  | -1.15883 |
| H  | 1.28973  | 0.56686  | -2.18404 |
| C  | -2.41618 | -0.32706 | 0.00000  |
| C  | -2.17824 | 0.47243  | 1.14821  |
| C  | -2.17824 | 0.47243  | -1.14821 |
| H  | -2.68077 | -1.37373 | 0.00000  |
| C  | -1.79588 | 1.76830  | 0.70924  |
| H  | -2.23852 | 0.14060  | 2.17368  |
| C  | -1.79588 | 1.76830  | -0.70924 |
| H  | -2.23852 | 0.14060  | -2.17368 |
| H  | -1.51266 | 2.59605  | 1.34171  |
| H  | -1.51266 | 2.59605  | -1.34171 |
| H  | 1.28973  | 0.56686  | 2.18404  |
| C1 | 0.47187  | -2.38916 | 1.71032  |
| C1 | 1.98474  | 2.65417  | 0.00000  |
| C1 | 0.47187  | -2.38916 | -1.71032 |

21

Energy: -2765467.0131865

|    |          |          |          |
|----|----------|----------|----------|
| Fe | 0.00000  | 0.00000  | 0.22421  |
| C  | 0.36893  | -1.72948 | 1.24663  |
| C  | 0.00000  | -2.01751 | -0.09390 |
| C  | 1.53505  | -0.92307 | 1.18939  |
| C  | 0.93540  | -1.38623 | -0.96297 |
| C  | 1.88576  | -0.69433 | -0.16589 |
| H  | 2.71348  | -0.10512 | -0.52735 |
| C  | -0.93540 | 1.38623  | -0.96297 |
| C  | -1.88576 | 0.69433  | -0.16589 |
| C  | 0.00000  | 2.01751  | -0.09390 |
| C  | -1.53505 | 0.92307  | 1.18939  |
| H  | -2.71348 | 0.10512  | -0.52735 |
| C  | -0.36893 | 1.72948  | 1.24663  |
| H  | 0.14911  | 2.05307  | 2.13539  |
| H  | -0.14911 | -2.05307 | 2.13539  |
| C1 | -1.28795 | -3.02494 | -0.58148 |
| C1 | 2.41504  | -0.35970 | 2.54687  |
| C1 | 0.96286  | -1.52119 | -2.65965 |
| C1 | -0.96286 | 1.52119  | -2.65965 |
| C1 | 1.28795  | 3.02494  | -0.58148 |
| C1 | -2.41504 | 0.35970  | 2.54687  |

21

Energy: -2188833.1490026

|    |          |         |         |
|----|----------|---------|---------|
| Fe | 0.00000  | 0.00000 | 0.71740 |
| C  | -1.80360 | 0.19518 | 1.65333 |
| C  | -1.06104 | 1.40068 | 1.76150 |

|    |          |          |          |
|----|----------|----------|----------|
| C  | -1.99598 | -0.09456 | 0.27781  |
| H  | -2.13948 | -0.41482 | 2.47783  |
| C  | -0.79670 | 1.86134  | 0.44530  |
| H  | -0.73731 | 1.88802  | 2.66764  |
| C  | -1.37996 | 0.94166  | -0.47189 |
| H  | -2.49703 | -0.95245 | -0.14296 |
| C  | 1.06104  | -1.40068 | 1.76150  |
| C  | 0.79670  | -1.86134 | 0.44530  |
| C  | 1.80360  | -0.19518 | 1.65333  |
| H  | 0.73731  | -1.88802 | 2.66764  |
| C  | 1.37996  | -0.94166 | -0.47189 |
| C  | 1.99598  | 0.09456  | 0.27781  |
| H  | 2.13948  | 0.41482  | 2.47783  |
| H  | 2.49703  | 0.95245  | -0.14296 |
| Cl | 0.00000  | -3.31456 | 0.02995  |
| Cl | 1.41307  | -1.11566 | -2.16672 |
| Cl | -1.41307 | 1.11566  | -2.16672 |
| Cl | 0.00000  | 3.31456  | 0.02995  |

21

Energy: -2188833.7933043

|    |          |          |          |
|----|----------|----------|----------|
| Fe | 0.00000  | 0.00000  | 0.25991  |
| C  | 0.00000  | 2.01594  | 0.58148  |
| C  | 0.90719  | 1.37918  | 1.46803  |
| C  | 0.39472  | 1.73044  | -0.75121 |
| H  | -0.87107 | 2.58345  | 0.87199  |
| C  | 1.87172  | 0.69691  | 0.68009  |
| H  | 0.87861  | 1.38856  | 2.54618  |
| C  | 1.55564  | 0.91536  | -0.69123 |
| H  | -0.10224 | 2.04019  | -1.65740 |
| C  | -1.87172 | -0.69691 | 0.68009  |
| C  | -1.55564 | -0.91536 | -0.69123 |
| C  | -0.90719 | -1.37918 | 1.46803  |
| C  | -0.39472 | -1.73044 | -0.75121 |
| C  | 0.00000  | -2.01594 | 0.58148  |
| H  | -0.87861 | -1.38856 | 2.54618  |
| H  | 0.10224  | -2.04019 | -1.65740 |
| H  | 0.87107  | -2.58345 | 0.87199  |
| Cl | -2.46776 | -0.35848 | -2.02407 |
| Cl | -3.22691 | 0.16246  | 1.26745  |
| Cl | 2.46776  | 0.35848  | -2.02407 |
| Cl | 3.22691  | -0.16246 | 1.26745  |

21

Energy: -1612198.9914518

|    |          |          |          |
|----|----------|----------|----------|
| Fe | 0.21896  | 0.70421  | 0.00000  |
| C  | 2.17711  | 0.12004  | 0.00000  |
| C  | 1.51402  | -0.37695 | 1.15272  |
| C  | 1.51402  | -0.37695 | -1.15272 |
| H  | 3.02744  | 0.78461  | 0.00000  |
| C  | 0.43541  | -1.18842 | 0.71201  |
| H  | 1.76193  | -0.17869 | 2.18352  |
| C  | 0.43541  | -1.18842 | -0.71201 |
| H  | 1.76193  | -0.17869 | -2.18352 |
| C  | 0.16479  | 2.75373  | 0.00000  |
| C  | -0.49561 | 2.24215  | -1.14889 |

|    |          |          |          |
|----|----------|----------|----------|
| C  | -0.49561 | 2.24215  | 1.14889  |
| H  | 1.03225  | 3.39607  | 0.00000  |
| C  | -1.56213 | 1.41390  | -0.70978 |
| H  | -0.21667 | 2.42519  | -2.17541 |
| C  | -1.56213 | 1.41390  | 0.70978  |
| H  | -0.21667 | 2.42519  | 2.17541  |
| H  | -2.22547 | 0.84443  | -1.34331 |
| H  | -2.22547 | 0.84443  | 1.34331  |
| Cl | -0.62188 | -2.08832 | -1.71044 |
| Cl | -0.62188 | -2.08832 | 1.71044  |

21  
Energy: -2188832.5883480

|    |          |          |          |
|----|----------|----------|----------|
| Fe | 0.00000  | 0.00000  | 0.93170  |
| C  | 0.00000  | 1.62732  | 2.16161  |
| C  | 1.15187  | 1.64207  | 1.33235  |
| C  | -1.15187 | 1.64207  | 1.33235  |
| H  | 0.00000  | 1.58461  | 3.24004  |
| C  | 0.71182  | 1.67580  | -0.01660 |
| H  | 2.18305  | 1.62626  | 1.64835  |
| C  | -0.71182 | 1.67580  | -0.01660 |
| H  | -2.18305 | 1.62626  | 1.64835  |
| C  | 0.00000  | -1.62732 | 2.16161  |
| C  | -1.15187 | -1.64207 | 1.33235  |
| C  | 1.15187  | -1.64207 | 1.33235  |
| H  | 0.00000  | -1.58461 | 3.24004  |
| C  | -0.71182 | -1.67580 | -0.01660 |
| H  | -2.18305 | -1.62626 | 1.64835  |
| C  | 0.71182  | -1.67580 | -0.01660 |
| H  | 2.18305  | -1.62626 | 1.64835  |
| Cl | -1.70643 | -1.80635 | -1.39434 |
| Cl | 1.70643  | -1.80635 | -1.39434 |
| Cl | 1.70643  | 1.80635  | -1.39434 |
| Cl | -1.70643 | 1.80635  | -1.39434 |

21  
Energy: -2188833.7933043

|    |          |          |          |
|----|----------|----------|----------|
| Fe | 0.00000  | 0.00000  | -0.25992 |
| C  | -1.55564 | -0.91537 | 0.69123  |
| C  | -1.87172 | -0.69691 | -0.68009 |
| C  | -0.39472 | -1.73044 | 0.75120  |
| C  | -0.90719 | -1.37918 | -1.46804 |
| C  | 0.00000  | -2.01594 | -0.58149 |
| H  | 0.10226  | -2.04019 | 1.65739  |
| H  | -0.87862 | -1.38855 | -2.54619 |
| H  | 0.87108  | -2.58344 | -0.87200 |
| C  | 0.00000  | 2.01594  | -0.58149 |
| C  | 0.39472  | 1.73044  | 0.75120  |
| C  | 0.90719  | 1.37918  | -1.46804 |
| H  | -0.87108 | 2.58344  | -0.87200 |
| C  | 1.55564  | 0.91537  | 0.69123  |
| H  | -0.10226 | 2.04019  | 1.65739  |
| C  | 1.87172  | 0.69691  | -0.68009 |
| H  | 0.87862  | 1.38855  | -2.54619 |
| Cl | -2.46775 | -0.35849 | 2.02408  |
| Cl | -3.22691 | 0.16246  | -1.26744 |

|    |         |          |          |
|----|---------|----------|----------|
| C1 | 2.46775 | 0.35849  | 2.02408  |
| C1 | 3.22691 | -0.16246 | -1.26744 |

21  
Energy: -2188833.5639182

|    |          |          |          |
|----|----------|----------|----------|
| Fe | 0.00000  | 0.00000  | 0.00000  |
| C  | 1.31588  | 1.38949  | 0.71166  |
| C  | 1.31588  | 1.38949  | -0.71166 |
| C  | 0.00000  | 1.69042  | 1.15215  |
| C  | 0.00000  | 1.69042  | -1.15215 |
| C  | -0.80661 | 1.87773  | 0.00000  |
| H  | -0.31611 | 1.74049  | 2.18231  |
| H  | -0.31611 | 1.74049  | -2.18231 |
| H  | -1.86646 | 2.08224  | 0.00000  |
| C  | 0.00000  | -1.69042 | -1.15215 |
| C  | 0.80661  | -1.87773 | 0.00000  |
| C  | -1.31588 | -1.38949 | -0.71166 |
| H  | 0.31611  | -1.74049 | -2.18231 |
| C  | 0.00000  | -1.69042 | 1.15215  |
| H  | 1.86646  | -2.08224 | 0.00000  |
| C  | -1.31588 | -1.38949 | 0.71166  |
| H  | 0.31611  | -1.74049 | 2.18231  |
| C1 | 2.67979  | 1.13714  | 1.70884  |
| C1 | -2.67979 | -1.13714 | 1.70884  |
| C1 | -2.67979 | -1.13714 | -1.70884 |
| C1 | 2.67979  | 1.13714  | -1.70884 |

21  
Energy: -1612198.4986561

|    |          |          |          |
|----|----------|----------|----------|
| Fe | 0.22445  | 0.70184  | 0.00000  |
| C  | 0.43948  | -1.19206 | 0.71180  |
| C  | 0.43948  | -1.19206 | -0.71180 |
| C  | 1.52001  | -0.38371 | 1.15242  |
| C  | 1.52001  | -0.38371 | -1.15242 |
| C  | 2.18415  | 0.11129  | 0.00000  |
| H  | 1.76648  | -0.18344 | 2.18324  |
| H  | 1.76648  | -0.18344 | -2.18324 |
| H  | 3.03460  | 0.77578  | 0.00000  |
| C  | -1.08589 | 1.77936  | -1.14846 |
| C  | -1.74270 | 1.26501  | 0.00000  |
| C  | -0.02314 | 2.61281  | -0.70974 |
| H  | -1.32781 | 1.54435  | -2.17395 |
| C  | -1.08589 | 1.77936  | 1.14846  |
| H  | -2.56547 | 0.56604  | 0.00000  |
| C  | -0.02314 | 2.61281  | 0.70974  |
| H  | 0.68177  | 3.12880  | -1.34393 |
| H  | -1.32781 | 1.54435  | 2.17395  |
| H  | 0.68177  | 3.12880  | 1.34393  |
| C1 | -0.62941 | -2.07716 | 1.71044  |
| C1 | -0.62941 | -2.07716 | -1.71044 |

21  
Energy: -2188833.1491909

|    |          |          |          |
|----|----------|----------|----------|
| Fe | 0.00000  | 0.00000  | 0.72122  |
| C  | -0.90307 | -1.40509 | -0.46865 |



|    |          |          |          |
|----|----------|----------|----------|
| C  | 0.00000  | -2.02368 | 0.44188  |
| C  | -1.87386 | -0.69816 | 0.28840  |
| C  | -0.41804 | -1.70924 | 1.76128  |
| C  | -1.57617 | -0.89371 | 1.66177  |
| H  | -2.67457 | -0.10573 | -0.12629 |
| H  | 0.07586  | -2.03308 | 2.66381  |
| H  | -2.12145 | -0.46895 | 2.49061  |
| C  | 1.87386  | 0.69816  | 0.28840  |
| C  | 0.90307  | 1.40509  | -0.46865 |
| C  | 1.57617  | 0.89371  | 1.66177  |
| H  | 2.67457  | 0.10573  | -0.12629 |
| C  | 0.00000  | 2.02368  | 0.44188  |
| C  | 0.41804  | 1.70924  | 1.76128  |
| H  | 2.12145  | 0.46895  | 2.49061  |
| H  | -0.07586 | 2.03308  | 2.66381  |
| Cl | -0.87381 | -1.57243 | -2.16419 |
| Cl | 1.30250  | -3.04426 | 0.01643  |
| Cl | 0.87381  | 1.57243  | -2.16419 |
| Cl | -1.30250 | 3.04426  | 0.01643  |

36

Energy: -1158812.4212752

|    |          |          |          |
|----|----------|----------|----------|
| Fe | 0.00000  | 0.00000  | 0.49822  |
| C  | 0.71403  | -0.98277 | -1.14420 |
| C  | -0.71403 | -0.98277 | -1.14420 |
| C  | 1.15532  | 0.37539  | -1.14420 |
| C  | -1.15532 | 0.37539  | -1.14420 |
| C  | 0.00000  | 1.21477  | -1.14420 |
| C  | 0.71025  | -0.97758 | 2.15499  |
| C  | 1.14922  | 0.37340  | 2.15499  |
| C  | -0.71025 | -0.97758 | 2.15499  |
| H  | 1.34485  | -1.85102 | 2.13486  |
| C  | 0.00000  | 1.20836  | 2.15499  |
| H  | 2.17601  | 0.70703  | 2.13486  |
| C  | -1.14922 | 0.37340  | 2.15499  |
| H  | -1.34485 | -1.85102 | 2.13486  |
| H  | 0.00000  | 2.28799  | 2.13486  |
| H  | -2.17601 | 0.70703  | 2.13486  |
| C  | 0.00000  | 2.70485  | -1.19286 |
| H  | 0.00000  | 3.06450  | -2.22790 |
| H  | -0.88068 | 3.12367  | -0.70262 |
| H  | 0.88068  | 3.12367  | -0.70262 |
| C  | -2.57246 | 0.83584  | -1.19286 |
| H  | -3.24293 | 0.12769  | -0.70262 |
| H  | -2.69864 | 1.80284  | -0.70262 |
| H  | -2.91451 | 0.94698  | -2.22790 |
| C  | 2.57246  | 0.83584  | -1.19286 |
| H  | 2.91451  | 0.94698  | -2.22790 |
| H  | 2.69864  | 1.80284  | -0.70262 |
| H  | 3.24293  | 0.12769  | -0.70262 |
| C  | -1.58987 | -2.18827 | -1.19286 |
| H  | -2.54853 | -2.00945 | -0.70262 |
| H  | -1.80127 | -2.47923 | -2.22790 |
| H  | -1.12356 | -3.04475 | -0.70262 |
| C  | 1.58987  | -2.18827 | -1.19286 |
| H  | 1.80127  | -2.47923 | -2.22790 |
| H  | 2.54853  | -2.00945 | -0.70262 |

|   |         |          |          |
|---|---------|----------|----------|
| H | 1.12356 | -3.04475 | -0.70262 |
|---|---------|----------|----------|

51

Energy: -1282059.6721475

|    |          |          |          |
|----|----------|----------|----------|
| Fe | 0.00000  | 0.00000  | 0.00000  |
| C  | -0.71348 | -0.98202 | 1.66128  |
| C  | 0.71348  | -0.98202 | 1.66128  |
| C  | -1.15444 | 0.37510  | 1.66128  |
| C  | 1.15444  | 0.37510  | 1.66128  |
| C  | 0.00000  | 1.21385  | 1.66128  |
| C  | -0.71348 | -0.98202 | -1.66128 |
| C  | -1.15444 | 0.37510  | -1.66128 |
| C  | 0.71348  | -0.98202 | -1.66128 |
| C  | 0.00000  | 1.21385  | -1.66128 |
| C  | 1.15444  | 0.37510  | -1.66128 |
| C  | 0.00000  | 2.70118  | 1.75319  |
| H  | 0.00000  | 3.02775  | 2.79924  |
| H  | 0.88023  | 3.13729  | 1.27746  |
| H  | -0.88023 | 3.13729  | 1.27746  |
| C  | 2.56897  | 0.83471  | 1.75319  |
| H  | 3.25575  | 0.13233  | 1.27746  |
| H  | 2.71174  | 1.80662  | 1.27746  |
| H  | 2.87956  | 0.93563  | 2.79924  |
| C  | -2.56897 | 0.83471  | 1.75319  |
| H  | -2.87956 | 0.93563  | 2.79924  |
| H  | -2.71174 | 1.80662  | 1.27746  |
| H  | -3.25575 | 0.13233  | 1.27746  |
| C  | 1.58771  | -2.18530 | 1.75319  |
| H  | 2.55617  | -2.02074 | 1.27746  |
| H  | 1.77967  | -2.44950 | 2.79924  |
| H  | 1.13193  | -3.05551 | 1.27746  |
| C  | -1.58771 | -2.18530 | 1.75319  |
| H  | -1.77967 | -2.44950 | 2.79924  |
| H  | -2.55617 | -2.02074 | 1.27746  |
| H  | -1.13193 | -3.05551 | 1.27746  |
| C  | 0.00000  | 2.70118  | -1.75319 |
| H  | -0.88023 | 3.13729  | -1.27746 |
| H  | 0.88023  | 3.13729  | -1.27746 |
| H  | 0.00000  | 3.02775  | -2.79924 |
| C  | -2.56897 | 0.83471  | -1.75319 |
| H  | -2.71174 | 1.80662  | -1.27746 |
| H  | -2.87956 | 0.93563  | -2.79924 |
| H  | -3.25575 | 0.13233  | -1.27746 |
| C  | -1.58771 | -2.18530 | -1.75319 |
| H  | -2.55617 | -2.02074 | -1.27746 |
| H  | -1.77967 | -2.44950 | -2.79924 |
| H  | -1.13193 | -3.05551 | -1.27746 |
| C  | 1.58771  | -2.18530 | -1.75319 |
| H  | 1.13193  | -3.05551 | -1.27746 |
| H  | 1.77967  | -2.44950 | -2.79924 |
| H  | 2.55617  | -2.02074 | -1.27746 |
| C  | 2.56897  | 0.83471  | -1.75319 |
| H  | 3.25575  | 0.13233  | -1.27746 |
| H  | 2.87956  | 0.93563  | -2.79924 |
| H  | 2.71174  | 1.80662  | -1.27746 |

51

Energy: -1282059.8828338

|    |          |          |          |
|----|----------|----------|----------|
| Fe | 0.00000  | 0.00000  | 0.00000  |
| C  | -1.04230 | -0.62214 | 1.66006  |
| C  | 0.26960  | -1.18354 | 1.66006  |
| C  | -0.91378 | 0.79904  | 1.66006  |
| C  | 1.20893  | -0.10933 | 1.66006  |
| C  | 0.47756  | 1.11597  | 1.66006  |
| C  | -1.20893 | -0.10933 | -1.66006 |
| C  | -0.47756 | 1.11597  | -1.66006 |
| C  | -0.26960 | -1.18354 | -1.66006 |
| C  | 0.91378  | 0.79904  | -1.66006 |
| C  | 1.04230  | -0.62214 | -1.66006 |
| C  | 1.06220  | 2.48497  | 1.73670  |
| H  | 1.17253  | 2.80667  | 2.77848  |
| H  | 2.05124  | 2.52871  | 1.27762  |
| H  | 0.43196  | 3.22259  | 1.23566  |
| C  | 2.69159  | -0.24232 | 1.73670  |
| H  | 3.03881  | -1.16943 | 1.27762  |
| H  | 3.19835  | 0.58501  | 1.23566  |
| H  | 3.03163  | -0.24783 | 2.77848  |
| C  | -2.03511 | 1.77811  | 1.73670  |
| H  | -2.30697 | 1.98245  | 2.77848  |
| H  | -1.77108 | 2.73226  | 1.27762  |
| H  | -2.93138 | 1.40666  | 1.23566  |
| C  | 0.60129  | -2.63473 | 1.73670  |
| H  | 1.54472  | -2.86103 | 1.23566  |
| H  | 0.70112  | -2.95983 | 2.77848  |
| H  | -0.17315 | -3.25146 | 1.27762  |
| C  | -2.31997 | -1.38604 | 1.73670  |
| H  | -2.59831 | -1.58145 | 2.77848  |
| H  | -3.14582 | -0.84008 | 1.27762  |
| H  | -2.24366 | -2.35323 | 1.23566  |
| C  | 2.03511  | 1.77811  | -1.73670 |
| H  | 1.77108  | 2.73226  | -1.27762 |
| H  | 2.93138  | 1.40666  | -1.23566 |
| H  | 2.30697  | 1.98245  | -2.77848 |
| C  | -1.06220 | 2.48497  | -1.73670 |
| H  | -0.43196 | 3.22259  | -1.23566 |
| H  | -1.17253 | 2.80667  | -2.77848 |
| H  | -2.05124 | 2.52871  | -1.27762 |
| C  | -2.69159 | -0.24232 | -1.73670 |
| H  | -3.19835 | 0.58501  | -1.23566 |
| H  | -3.03163 | -0.24783 | -2.77848 |
| H  | -3.03881 | -1.16943 | -1.27762 |
| C  | -0.60129 | -2.63473 | -1.73670 |
| H  | -1.54472 | -2.86103 | -1.23566 |
| H  | -0.70112 | -2.95983 | -2.77848 |
| H  | 0.17315  | -3.25146 | -1.27762 |
| C  | 2.31997  | -1.38604 | -1.73670 |
| H  | 2.24366  | -2.35323 | -1.23566 |
| H  | 2.59831  | -1.58145 | -2.77848 |
| H  | 3.14582  | -0.84008 | -1.27762 |

36

Energy: -1158811.9411677

|    |         |         |         |
|----|---------|---------|---------|
| Fe | 0.00000 | 0.00000 | 0.49568 |
|----|---------|---------|---------|

|   |          |          |          |
|---|----------|----------|----------|
| C | 0.00000  | 1.21444  | -1.14954 |
| C | 1.15500  | 0.37528  | -1.14954 |
| C | -1.15500 | 0.37528  | -1.14954 |
| C | 0.71383  | -0.98250 | -1.14954 |
| C | -0.71383 | -0.98250 | -1.14954 |
| C | 1.14898  | -0.37333 | 2.15605  |
| C | 0.71011  | 0.97738  | 2.15605  |
| C | 0.00000  | -1.20810 | 2.15605  |
| H | 2.17576  | -0.70695 | 2.13688  |
| C | -0.71011 | 0.97738  | 2.15605  |
| H | 1.34470  | 1.85082  | 2.13688  |
| C | -1.14898 | -0.37333 | 2.15605  |
| H | 0.00000  | -2.28773 | 2.13688  |
| H | -1.34470 | 1.85082  | 2.13688  |
| H | -2.17576 | -0.70695 | 2.13688  |
| C | 0.00000  | 2.70452  | -1.18968 |
| H | 0.00000  | 3.07074  | -2.22234 |
| H | -0.88051 | 3.12013  | -0.69651 |
| H | 0.88051  | 3.12013  | -0.69651 |
| C | 2.57215  | 0.83574  | -1.18968 |
| H | 2.92045  | 0.94891  | -2.22234 |
| H | 2.69533  | 1.80159  | -0.69651 |
| H | 3.23951  | 0.12676  | -0.69651 |
| C | 1.58968  | -2.18800 | -1.18968 |
| H | 1.80494  | -2.48428 | -2.22234 |
| H | 2.54631  | -2.00669 | -0.69651 |
| H | 1.12162  | -3.04179 | -0.69651 |
| C | -2.57215 | 0.83574  | -1.18968 |
| H | -2.69533 | 1.80159  | -0.69651 |
| H | -2.92045 | 0.94891  | -2.22234 |
| H | -3.23951 | 0.12676  | -0.69651 |
| C | -1.58968 | -2.18800 | -1.18968 |
| H | -1.12162 | -3.04179 | -0.69651 |
| H | -2.54631 | -2.00669 | -0.69651 |
| H | -1.80494 | -2.48428 | -2.22234 |

51

Energy: -1282059.8321059

|    |          |          |          |
|----|----------|----------|----------|
| Fe | 0.00000  | 0.00000  | 0.00000  |
| C  | 0.00000  | 1.21380  | 1.66107  |
| C  | -1.15439 | 0.37508  | 1.66107  |
| C  | 1.15439  | 0.37508  | 1.66107  |
| C  | -0.71345 | -0.98198 | 1.66107  |
| C  | 0.71345  | -0.98198 | 1.66107  |
| C  | -1.15439 | -0.37508 | -1.66107 |
| C  | -0.71345 | 0.98198  | -1.66107 |
| C  | 0.00000  | -1.21380 | -1.66107 |
| C  | 0.71345  | 0.98198  | -1.66107 |
| C  | 1.15439  | -0.37508 | -1.66107 |
| C  | 0.00000  | 2.70257  | 1.73534  |
| H  | 0.00000  | 3.04380  | 2.77676  |
| H  | 0.88135  | 3.13115  | 1.25458  |
| H  | -0.88135 | 3.13115  | 1.25458  |
| C  | -2.57029 | 0.83514  | 1.73534  |
| H  | -2.89482 | 0.94059  | 2.77676  |
| H  | -2.70555 | 1.80580  | 1.25458  |
| H  | -3.25025 | 0.12936  | 1.25458  |

|   |          |          |          |
|---|----------|----------|----------|
| C | -1.58853 | -2.18642 | 1.73534  |
| H | -1.78910 | -2.46248 | 2.77676  |
| H | -2.55347 | -2.01511 | 1.25458  |
| H | -1.12741 | -3.05120 | 1.25458  |
| C | 2.57029  | 0.83514  | 1.73534  |
| H | 2.70555  | 1.80580  | 1.25458  |
| H | 2.89482  | 0.94059  | 2.77676  |
| H | 3.25025  | 0.12936  | 1.25458  |
| C | 1.58853  | -2.18642 | 1.73534  |
| H | 1.12741  | -3.05120 | 1.25458  |
| H | 2.55347  | -2.01511 | 1.25458  |
| H | 1.78910  | -2.46248 | 2.77676  |
| C | 0.00000  | -2.70257 | -1.73534 |
| H | 0.00000  | -3.04380 | -2.77676 |
| H | 0.88135  | -3.13115 | -1.25458 |
| H | -0.88135 | -3.13115 | -1.25458 |
| C | -2.57029 | -0.83514 | -1.73534 |
| H | -2.89482 | -0.94059 | -2.77676 |
| H | -2.70555 | -1.80580 | -1.25458 |
| H | -3.25025 | -0.12936 | -1.25458 |
| C | 2.57029  | -0.83514 | -1.73534 |
| H | 2.70555  | -1.80580 | -1.25458 |
| H | 2.89482  | -0.94059 | -2.77676 |
| H | 3.25025  | -0.12936 | -1.25458 |
| C | 1.58853  | 2.18642  | -1.73534 |
| H | 2.55347  | 2.01511  | -1.25458 |
| H | 1.78910  | 2.46248  | -2.77676 |
| H | 1.12741  | 3.05120  | -1.25458 |
| C | -1.58853 | 2.18642  | -1.73534 |
| H | -1.78910 | 2.46248  | -2.77676 |
| H | -2.55347 | 2.01511  | -1.25458 |
| H | -1.12741 | 3.05120  | -1.25458 |

33

Energy: -1134163.4519249

|    |          |          |          |
|----|----------|----------|----------|
| Fe | 0.00000  | 0.00000  | 0.05581  |
| C  | -0.70786 | -1.63497 | 1.04885  |
| C  | -1.14642 | -1.65388 | -0.30233 |
| C  | 0.71487  | -1.63898 | 1.06045  |
| H  | -1.34238 | -1.59240 | 1.92270  |
| C  | -0.00248 | -1.67301 | -1.14742 |
| H  | -2.17338 | -1.63314 | -0.63766 |
| C  | 1.13964  | -1.66182 | -0.29779 |
| C  | -0.71487 | 1.63898  | 1.06045  |
| C  | 0.70786  | 1.63497  | 1.04885  |
| C  | -1.13964 | 1.66182  | -0.29779 |
| C  | 1.14642  | 1.65388  | -0.30233 |
| H  | 1.34238  | 1.59240  | 1.92270  |
| C  | 0.00248  | 1.67301  | -1.14742 |
| H  | -2.16791 | 1.64931  | -0.63198 |
| H  | 2.17338  | 1.63314  | -0.63766 |
| C  | 0.00000  | -1.77042 | -2.63392 |
| H  | -0.88537 | -1.30081 | -3.06689 |
| H  | 0.88129  | -1.29187 | -3.06544 |
| H  | 0.00561  | -2.81813 | -2.95179 |
| H  | 2.16791  | -1.64931 | -0.63198 |
| C  | 1.59289  | -1.66816 | 2.26459  |

|   |          |          |          |
|---|----------|----------|----------|
| H | 2.54555  | -1.16962 | 2.07465  |
| H | 1.11753  | -1.17580 | 3.11545  |
| H | 1.81284  | -2.69907 | 2.56084  |
| C | 0.00000  | 1.77042  | -2.63392 |
| H | 0.88537  | 1.30081  | -3.06689 |
| H | -0.88129 | 1.29187  | -3.06544 |
| H | -0.00561 | 2.81813  | -2.95179 |
| C | -1.59289 | 1.66816  | 2.26459  |
| H | -2.54555 | 1.16962  | 2.07465  |
| H | -1.11753 | 1.17580  | 3.11545  |
| H | -1.81284 | 2.69907  | 2.56084  |

33

Energy: -1134163.6728082

|    |          |          |          |
|----|----------|----------|----------|
| Fe | 0.00000  | 0.00000  | 0.18353  |
| C  | 1.70135  | -1.06633 | 0.55376  |
| C  | 0.64379  | -1.51969 | 1.38758  |
| C  | 1.30824  | -1.23428 | -0.80318 |
| H  | 2.63557  | -0.63786 | 0.88785  |
| C  | -0.42006 | -1.97394 | 0.55964  |
| H  | 0.63176  | -1.49742 | 2.46775  |
| C  | 0.00000  | -1.79585 | -0.78905 |
| C  | 0.42006  | 1.97394  | 0.55964  |
| C  | 0.00000  | 1.79585  | -0.78905 |
| C  | -0.64379 | 1.51969  | 1.38758  |
| C  | -1.30824 | 1.23428  | -0.80318 |
| H  | 0.59259  | 2.02369  | -1.66467 |
| C  | -1.70135 | 1.06633  | 0.55376  |
| H  | -0.63176 | 1.49742  | 2.46775  |
| H  | -2.63557 | 0.63786  | 0.88785  |
| C  | -1.70641 | -2.57239 | 1.01655  |
| H  | -2.00871 | -2.17122 | 1.98594  |
| H  | -2.51098 | -2.37760 | 0.30450  |
| H  | -1.61496 | -3.65840 | 1.12209  |
| H  | -0.59259 | -2.02369 | -1.66467 |
| C  | 2.12998  | -0.93129 | -2.00920 |
| H  | 2.82105  | -0.10680 | -1.82242 |
| H  | 2.72599  | -1.80158 | -2.30289 |
| H  | 1.50251  | -0.65974 | -2.86058 |
| C  | -2.12998 | 0.93129  | -2.00920 |
| H  | -2.72599 | 1.80158  | -2.30289 |
| H  | -1.50251 | 0.65974  | -2.86058 |
| H  | -2.82105 | 0.10680  | -1.82242 |
| C  | 1.70641  | 2.57239  | 1.01655  |
| H  | 2.51098  | 2.37760  | 0.30450  |
| H  | 1.61496  | 3.65840  | 1.12209  |
| H  | 2.00871  | 2.17122  | 1.98594  |

27

Energy: -1084863.5274328

|    |          |          |          |
|----|----------|----------|----------|
| Fe | -0.09498 | 0.25680  | 0.00000  |
| C  | -1.28541 | -1.23978 | 0.71042  |
| C  | -1.28541 | -1.23978 | -0.71042 |
| C  | 0.05094  | -1.42674 | 1.16111  |
| H  | -2.14672 | -1.09156 | 1.34564  |
| C  | 0.05094  | -1.42674 | -1.16111 |

|   |          |          |          |
|---|----------|----------|----------|
| H | -2.14672 | -1.09156 | -1.34564 |
| C | 0.86653  | -1.54319 | 0.00000  |
| C | -0.83448 | 2.03095  | 0.71009  |
| C | 0.50326  | 1.84286  | 1.14927  |
| C | -0.83448 | 2.03095  | -0.71009 |
| H | -1.70255 | 2.13053  | 1.34398  |
| C | 1.32995  | 1.72767  | 0.00000  |
| H | 0.83072  | 1.77457  | 2.17588  |
| C | 0.50326  | 1.84286  | -1.14927 |
| H | -1.70255 | 2.13053  | -1.34398 |
| H | 2.39586  | 1.55679  | 0.00000  |
| H | 0.83072  | 1.77457  | -2.17588 |
| C | 0.50368  | -1.53247 | -2.57715 |
| H | -0.13739 | -0.95176 | -3.24332 |
| H | 1.52798  | -1.17334 | -2.69508 |
| H | 0.47731  | -2.57293 | -2.91706 |
| H | 1.94039  | -1.66935 | 0.00000  |
| C | 0.50368  | -1.53247 | 2.57715  |
| H | 1.52798  | -1.17334 | 2.69508  |
| H | -0.13739 | -0.95176 | 3.24332  |
| H | 0.47731  | -2.57293 | 2.91706  |

33

Energy: -1134163.1290211

|    |          |          |          |
|----|----------|----------|----------|
| Fe | 0.00000  | 0.00000  | 0.21576  |
| C  | -0.71010 | 1.64321  | 1.20104  |
| C  | 0.71010  | 1.64321  | 1.20104  |
| C  | -1.16071 | 1.66276  | -0.14802 |
| H  | -1.34541 | 1.60903  | 2.07436  |
| C  | 1.16071  | 1.66276  | -0.14802 |
| H  | 1.34541  | 1.60903  | 2.07436  |
| C  | 0.00000  | 1.66897  | -0.97142 |
| C  | -0.71010 | -1.64321 | 1.20104  |
| C  | -1.16071 | -1.66276 | -0.14802 |
| C  | 0.71010  | -1.64321 | 1.20104  |
| H  | -1.34541 | -1.60903 | 2.07436  |
| C  | 0.00000  | -1.66897 | -0.97142 |
| C  | 1.16071  | -1.66276 | -0.14802 |
| H  | 1.34541  | -1.60903 | 2.07436  |
| H  | 0.00000  | -1.66517 | -2.05277 |
| C  | 2.57418  | 1.75055  | -0.60970 |
| H  | 3.25685  | 1.27548  | 0.09735  |
| H  | 2.70887  | 1.27340  | -1.58231 |
| H  | 2.88117  | 2.79659  | -0.71112 |
| H  | 0.00000  | 1.66517  | -2.05277 |
| C  | -2.57418 | 1.75055  | -0.60970 |
| H  | -2.88117 | 2.79659  | -0.71112 |
| H  | -2.70887 | 1.27340  | -1.58231 |
| H  | -3.25685 | 1.27548  | 0.09735  |
| C  | 2.57418  | -1.75055 | -0.60970 |
| H  | 2.70887  | -1.27340 | -1.58231 |
| H  | 3.25685  | -1.27548 | 0.09735  |
| H  | 2.88117  | -2.79659 | -0.71112 |
| C  | -2.57418 | -1.75055 | -0.60970 |
| H  | -3.25685 | -1.27548 | 0.09735  |
| H  | -2.70887 | -1.27340 | -1.58231 |
| H  | -2.88117 | -2.79659 | -0.71112 |

33

Energy: -1134163.6619586

|    |          |          |          |
|----|----------|----------|----------|
| Fe | 0.00000  | 0.00000  | 0.18378  |
| C  | -0.74046 | 1.87751  | 0.55980  |
| C  | -0.99151 | 1.49704  | -0.78904 |
| C  | -1.37665 | 0.91119  | 1.38744  |
| C  | -1.77181 | 0.30622  | -0.80351 |
| C  | -2.00740 | -0.05088 | 0.55332  |
| H  | -1.35486 | 0.89931  | 2.46762  |
| H  | -2.54983 | -0.92394 | 0.88718  |
| C  | 0.99151  | -1.49704 | -0.78904 |
| C  | 1.77181  | -0.30622 | -0.80351 |
| C  | 0.74046  | -1.87751 | 0.55980  |
| H  | 0.62279  | -2.01421 | -1.66446 |
| C  | 2.00740  | 0.05088  | 0.55332  |
| C  | 1.37665  | -0.91119 | 1.38744  |
| H  | 2.54983  | 0.92394  | 0.88718  |
| H  | 1.35486  | -0.89931 | 2.46762  |
| C  | 0.00000  | 3.08758  | 1.01720  |
| H  | -0.67745 | 3.94116  | 1.12404  |
| H  | 0.47467  | 2.92022  | 1.98607  |
| H  | 0.77721  | 3.37175  | 0.30483  |
| H  | -0.62279 | 2.01421  | -1.66446 |
| C  | -2.28895 | -0.40033 | -2.00969 |
| H  | -1.61258 | -0.28545 | -2.85919 |
| H  | -2.41545 | -1.46829 | -1.82081 |
| H  | -3.26364 | -0.00003 | -2.30741 |
| C  | 2.28895  | 0.40033  | -2.00969 |
| H  | 1.61258  | 0.28545  | -2.85919 |
| H  | 2.41545  | 1.46829  | -1.82081 |
| H  | 3.26364  | 0.00003  | -2.30741 |
| C  | 0.00000  | -3.08758 | 1.01720  |
| H  | -0.77721 | -3.37175 | 0.30483  |
| H  | 0.67745  | -3.94116 | 1.12404  |
| H  | -0.47467 | -2.92022 | 1.98607  |

33

Energy: -1134162.9601081

|    |          |          |          |
|----|----------|----------|----------|
| Fe | 0.00000  | 0.00000  | 0.00000  |
| C  | -0.39276 | 1.65417  | 1.16037  |
| C  | 0.34691  | 2.01721  | 0.00000  |
| C  | -1.60128 | 1.05571  | 0.71057  |
| C  | -0.39276 | 1.65417  | -1.16037 |
| C  | -1.60128 | 1.05571  | -0.71057 |
| H  | -2.37284 | 0.64544  | 1.34624  |
| H  | -2.37284 | 0.64544  | -1.34624 |
| C  | 1.60128  | -1.05571 | -0.71057 |
| C  | 1.60128  | -1.05571 | 0.71057  |
| C  | 0.39276  | -1.65417 | -1.16037 |
| H  | 2.37284  | -0.64544 | -1.34624 |
| C  | 0.39276  | -1.65417 | 1.16037  |
| H  | 2.37284  | -0.64544 | 1.34624  |
| C  | -0.34691 | -2.01721 | 0.00000  |
| H  | -1.32697 | -2.47409 | 0.00000  |
| C  | 0.00000  | 1.90696  | 2.57557  |



|   |          |          |          |
|---|----------|----------|----------|
| H | -0.32638 | 2.90154  | 2.89666  |
| H | -0.45424 | 1.17917  | 3.25056  |
| H | 1.08343  | 1.85919  | 2.70380  |
| H | 1.32697  | 2.47409  | 0.00000  |
| C | 0.00000  | 1.90696  | -2.57557 |
| H | 1.08343  | 1.85919  | -2.70380 |
| H | -0.45424 | 1.17917  | -3.25056 |
| H | -0.32638 | 2.90154  | -2.89666 |
| C | 0.00000  | -1.90696 | 2.57557  |
| H | 0.45424  | -1.17917 | 3.25056  |
| H | -1.08343 | -1.85919 | 2.70380  |
| H | 0.32638  | -2.90154 | 2.89666  |
| C | 0.00000  | -1.90696 | -2.57557 |
| H | -1.08343 | -1.85919 | -2.70380 |
| H | 0.45424  | -1.17917 | -3.25056 |
| H | 0.32638  | -2.90154 | -2.89666 |

27

Energy: -1084862.9493272

|    |          |          |          |
|----|----------|----------|----------|
| Fe | 0.09589  | 0.25575  | 0.00000  |
| C  | -0.05167 | -1.43101 | 1.16070  |
| C  | -0.86725 | -1.54618 | 0.00000  |
| C  | 1.28448  | -1.24594 | 0.71024  |
| C  | -0.05167 | -1.43101 | -1.16070 |
| C  | 1.28448  | -1.24594 | -0.71024 |
| H  | 2.14541  | -1.09548 | 1.34557  |
| H  | 2.14541  | -1.09548 | -1.34557 |
| C  | -1.09992 | 1.76272  | -0.71038 |
| C  | -1.09992 | 1.76272  | 0.71038  |
| C  | 0.23708  | 1.95009  | -1.14873 |
| H  | -1.96163 | 1.61964  | -1.34489 |
| C  | 0.23708  | 1.95009  | 1.14873  |
| H  | -1.96163 | 1.61964  | 1.34489  |
| C  | 1.06420  | 2.06427  | 0.00000  |
| H  | 0.57068  | 1.97324  | -2.17530 |
| H  | 0.57068  | 1.97324  | 2.17530  |
| H  | 2.13655  | 2.18826  | 0.00000  |
| C  | -0.50567 | -1.52874 | 2.57675  |
| H  | -0.48288 | -2.56753 | 2.92183  |
| H  | 0.13660  | -0.94661 | 3.24049  |
| H  | -1.52879 | -1.16550 | 2.69220  |
| H  | -1.94177 | -1.66730 | 0.00000  |
| C  | -0.50567 | -1.52874 | -2.57675 |
| H  | -1.52879 | -1.16550 | -2.69220 |
| H  | 0.13660  | -0.94661 | -3.24049 |
| H  | -0.48288 | -2.56753 | -2.92183 |

33

Energy: -1134163.6619586

|    |          |          |          |
|----|----------|----------|----------|
| Fe | 0.00000  | 0.00000  | 0.18378  |
| C  | -0.74046 | 1.87751  | 0.55979  |
| C  | -0.99151 | 1.49703  | -0.78905 |
| C  | -1.37665 | 0.91119  | 1.38744  |
| C  | -1.77182 | 0.30621  | -0.80351 |
| C  | -2.00740 | -0.05087 | 0.55333  |
| H  | -1.35485 | 0.89932  | 2.46762  |

|   |          |          |          |
|---|----------|----------|----------|
| H | -2.54982 | -0.92395 | 0.88719  |
| C | 1.77182  | -0.30621 | -0.80351 |
| C | 2.00740  | 0.05087  | 0.55333  |
| C | 0.99151  | -1.49703 | -0.78905 |
| C | 1.37665  | -0.91119 | 1.38744  |
| H | 2.54982  | 0.92395  | 0.88719  |
| C | 0.74046  | -1.87751 | 0.55979  |
| H | 0.62279  | -2.01419 | -1.66447 |
| H | 1.35485  | -0.89932 | 2.46762  |
| C | 0.00000  | 3.08758  | 1.01719  |
| H | -0.67745 | 3.94116  | 1.12402  |
| H | 0.47465  | 2.92022  | 1.98607  |
| H | 0.77723  | 3.37174  | 0.30483  |
| H | -0.62279 | 2.01419  | -1.66447 |
| C | -2.28895 | -0.40036 | -2.00968 |
| H | -1.61258 | -0.28547 | -2.85918 |
| H | -2.41544 | -1.46831 | -1.82079 |
| H | -3.26365 | -0.00007 | -2.30739 |
| C | 2.28895  | 0.40036  | -2.00968 |
| H | 3.26365  | 0.00007  | -2.30739 |
| H | 1.61258  | 0.28547  | -2.85918 |
| H | 2.41544  | 1.46831  | -1.82079 |
| C | 0.00000  | -3.08758 | 1.01719  |
| H | -0.77723 | -3.37174 | 0.30483  |
| H | 0.67745  | -3.94116 | 1.12402  |
| H | -0.47465 | -2.92022 | 1.98607  |

27

Energy: -1084863.5236050

|    |          |          |          |
|----|----------|----------|----------|
| Fe | 0.00000  | 0.00000  | 0.33746  |
| C  | -0.64289 | 1.52025  | 1.54505  |
| C  | 0.41190  | 1.96748  | 0.70693  |
| C  | -1.70141 | 1.07221  | 0.71036  |
| H  | -0.63112 | 1.49724  | 2.62425  |
| C  | 0.00000  | 1.79306  | -0.64150 |
| H  | 1.36825  | 2.34531  | 1.03569  |
| C  | -1.31052 | 1.23706  | -0.64835 |
| H  | -2.63764 | 0.64969  | 1.04514  |
| H  | 0.58940  | 2.01749  | -1.51905 |
| C  | 0.64289  | -1.52025 | 1.54505  |
| C  | -0.41190 | -1.96748 | 0.70693  |
| C  | 1.70141  | -1.07221 | 0.71036  |
| H  | 0.63112  | -1.49724 | 2.62425  |
| C  | 0.00000  | -1.79306 | -0.64150 |
| H  | -1.36825 | -2.34531 | 1.03569  |
| C  | 1.31052  | -1.23706 | -0.64835 |
| H  | 2.63764  | -0.64969 | 1.04514  |
| H  | -0.58940 | -2.01749 | -1.51905 |
| C  | -2.13834 | 0.93488  | -1.85041 |
| H  | -1.51427 | 0.67417  | -2.70757 |
| H  | -2.82111 | 0.10364  | -1.66383 |
| H  | -2.74306 | 1.80232  | -2.13411 |
| C  | 2.13834  | -0.93488 | -1.85041 |
| H  | 2.82111  | -0.10364 | -1.66383 |
| H  | 2.74306  | -1.80232 | -2.13411 |
| H  | 1.51427  | -0.67417 | -2.70757 |

27

Energy: -1084863.4957938

|    |          |          |          |
|----|----------|----------|----------|
| Fe | 0.00000  | 0.00000  | 0.13067  |
| C  | -1.52660 | -0.94324 | 1.10895  |
| C  | -1.88736 | -0.68729 | -0.24012 |
| C  | -0.36649 | -1.76290 | 1.10109  |
| H  | -2.02694 | -0.55921 | 1.98509  |
| C  | -0.94852 | -1.35143 | -1.07435 |
| H  | -2.71126 | -0.07376 | -0.57296 |
| C  | 0.00000  | -2.02001 | -0.25017 |
| H  | 0.16870  | -2.11224 | 1.97209  |
| H  | -0.93492 | -1.33233 | -2.15449 |
| C  | 0.36649  | 1.76290  | 1.10109  |
| C  | 1.52660  | 0.94324  | 1.10895  |
| C  | 0.00000  | 2.02001  | -0.25017 |
| H  | -0.16870 | 2.11224  | 1.97209  |
| C  | 1.88736  | 0.68729  | -0.24012 |
| H  | 2.02694  | 0.55921  | 1.98509  |
| C  | 0.94852  | 1.35143  | -1.07435 |
| H  | 2.71126  | 0.07376  | -0.57296 |
| H  | 0.93492  | 1.33233  | -2.15449 |
| C  | 1.13136  | -2.87212 | -0.71465 |
| H  | 0.81279  | -3.91337 | -0.82854 |
| H  | 1.51070  | -2.53582 | -1.68161 |
| H  | 1.95888  | -2.85657 | -0.00269 |
| C  | -1.13136 | 2.87212  | -0.71465 |
| H  | -1.51070 | 2.53582  | -1.68161 |
| H  | -1.95888 | 2.85657  | -0.00269 |
| H  | -0.81279 | 3.91337  | -0.82854 |

24

Energy: -1060213.3937010

|    |          |          |          |
|----|----------|----------|----------|
| Fe | 0.16248  | -0.20327 | 0.00000  |
| C  | 1.67115  | 0.97753  | 0.70979  |
| C  | 1.67115  | 0.97753  | -0.70979 |
| C  | 0.41201  | 1.47082  | 1.14466  |
| H  | 2.47354  | 0.63521  | 1.34565  |
| C  | 0.41201  | 1.47082  | -1.14466 |
| H  | 2.47354  | 0.63521  | -1.34565 |
| C  | -0.37634 | 1.77840  | 0.00000  |
| H  | 0.09044  | 1.57061  | 2.17120  |
| H  | 0.09044  | 1.57061  | -2.17120 |
| C  | 0.47260  | -2.09933 | 0.71018  |
| C  | -0.78538 | -1.60742 | 1.14905  |
| C  | 0.47260  | -2.09933 | -0.71018 |
| H  | 1.29398  | -2.39587 | 1.34466  |
| C  | -1.56296 | -1.30274 | 0.00000  |
| H  | -1.08742 | -1.46516 | 2.17560  |
| C  | -0.78538 | -1.60742 | -1.14905 |
| H  | 1.29398  | -2.39587 | -1.34466 |
| H  | -2.56010 | -0.88845 | 0.00000  |
| H  | -1.08742 | -1.46516 | -2.17560 |
| C  | -1.74804 | 2.36140  | 0.00000  |
| H  | -1.70524 | 3.45536  | 0.00000  |
| H  | -2.31046 | 2.05351  | -0.88363 |
| H  | -2.31046 | 2.05351  | 0.88363  |

27

Energy: -1084863.2950159

|    |          |          |          |
|----|----------|----------|----------|
| Fe | 0.00000  | 0.00000  | 0.40374  |
| C  | -0.70985 | 1.63702  | 1.39850  |
| C  | 0.70985  | 1.63702  | 1.39850  |
| C  | -1.14451 | 1.65844  | 0.04656  |
| H  | -1.34574 | 1.59608  | 2.26990  |
| C  | 1.14451  | 1.65844  | 0.04656  |
| H  | 1.34574  | 1.59608  | 2.26990  |
| C  | 0.00000  | 1.67489  | -0.79939 |
| H  | -2.17108 | 1.64293  | -0.28980 |
| H  | 2.17108  | 1.64293  | -0.28980 |
| C  | -0.70985 | -1.63702 | 1.39850  |
| C  | -1.14451 | -1.65844 | 0.04656  |
| C  | 0.70985  | -1.63702 | 1.39850  |
| H  | -1.34574 | -1.59608 | 2.26990  |
| C  | 0.00000  | -1.67489 | -0.79939 |
| H  | -2.17108 | -1.64293 | -0.28980 |
| C  | 1.14451  | -1.65844 | 0.04656  |
| H  | 1.34574  | -1.59608 | 2.26990  |
| H  | 2.17108  | -1.64293 | -0.28980 |
| C  | 0.00000  | 1.77469  | -2.28577 |
| H  | 0.00000  | 2.82302  | -2.60119 |
| H  | 0.88345  | 1.30160  | -2.71868 |
| H  | -0.88345 | 1.30160  | -2.71868 |
| C  | 0.00000  | -1.77469 | -2.28577 |
| H  | 0.00000  | -2.82302 | -2.60119 |
| H  | -0.88345 | -1.30160 | -2.71868 |
| H  | 0.88345  | -1.30160 | -2.71868 |

27

Energy: -1084863.2950159

|    |          |          |          |
|----|----------|----------|----------|
| Fe | -0.40374 | -0.00001 | 0.00000  |
| C  | -1.39850 | 0.70985  | 1.63702  |
| C  | -1.39850 | -0.70984 | 1.63703  |
| C  | -0.04656 | 1.14451  | 1.65844  |
| H  | -2.26990 | 1.34574  | 1.59608  |
| C  | -0.04656 | -1.14451 | 1.65845  |
| H  | -2.26990 | -1.34573 | 1.59610  |
| C  | 0.79939  | 0.00000  | 1.67489  |
| H  | 0.28980  | 2.17108  | 1.64293  |
| H  | 0.28979  | -2.17108 | 1.64296  |
| C  | -1.39850 | 0.70985  | -1.63702 |
| C  | -0.04656 | 1.14451  | -1.65844 |
| C  | -1.39850 | -0.70984 | -1.63703 |
| H  | -2.26990 | 1.34574  | -1.59608 |
| C  | 0.79939  | 0.00000  | -1.67489 |
| H  | 0.28980  | 2.17108  | -1.64293 |
| C  | -0.04656 | -1.14451 | -1.65845 |
| H  | -2.26990 | -1.34573 | -1.59610 |
| H  | 0.28979  | -2.17108 | -1.64296 |
| C  | 2.28577  | 0.00000  | 1.77469  |
| H  | 2.60119  | 0.00001  | 2.82302  |
| H  | 2.71868  | -0.88345 | 1.30160  |
| H  | 2.71869  | 0.88345  | 1.30158  |

|   |         |          |          |
|---|---------|----------|----------|
| C | 2.28577 | 0.00000  | -1.77469 |
| H | 2.60119 | 0.00001  | -2.82302 |
| H | 2.71869 | 0.88345  | -1.30158 |
| H | 2.71868 | -0.88345 | -1.30160 |

27

Energy: -1084863.5200659

|    |          |          |          |
|----|----------|----------|----------|
| Fe | 0.00000  | 0.00000  | 0.33761  |
| C  | 0.00000  | 1.80168  | -0.64892 |
| C  | -0.39014 | 1.97307  | 0.70920  |
| C  | 1.30438  | 1.23141  | -0.64015 |
| C  | 0.66155  | 1.51202  | 1.54545  |
| H  | -1.34079 | 2.36327  | 1.04253  |
| C  | 1.71227  | 1.05247  | 0.70888  |
| H  | 1.87370  | 0.95724  | -1.51681 |
| H  | 0.65155  | 1.48802  | 2.62464  |
| H  | 2.64338  | 0.61718  | 1.03904  |
| C  | -0.66155 | -1.51202 | 1.54545  |
| C  | -1.71227 | -1.05247 | 0.70888  |
| C  | 0.39014  | -1.97307 | 0.70920  |
| H  | -0.65155 | -1.48802 | 2.62464  |
| C  | -1.30438 | -1.23141 | -0.64015 |
| H  | -2.64338 | -0.61718 | 1.03904  |
| C  | 0.00000  | -1.80168 | -0.64892 |
| H  | 1.34079  | -2.36327 | 1.04253  |
| H  | -1.87370 | -0.95724 | -1.51681 |
| C  | -0.78663 | 2.19532  | -1.85219 |
| H  | -0.56934 | 3.22976  | -2.13742 |
| H  | -0.54817 | 1.56084  | -2.70819 |
| H  | -1.86002 | 2.12304  | -1.66626 |
| C  | 0.78663  | -2.19532 | -1.85219 |
| H  | 0.54817  | -1.56084 | -2.70819 |
| H  | 1.86002  | -2.12304 | -1.66626 |
| H  | 0.56934  | -3.22976 | -2.13742 |

27

Energy: -1084860.2770907

|    |          |          |          |
|----|----------|----------|----------|
| Fe | 0.00000  | 0.00000  | 0.00000  |
| C  | -0.82295 | 1.89535  | 0.00000  |
| C  | 0.00000  | 1.70001  | 1.14368  |
| C  | 0.00000  | 1.70001  | -1.14368 |
| C  | 1.31743  | 1.39186  | 0.70935  |
| H  | -0.33228 | 1.75711  | 2.17020  |
| C  | 1.31743  | 1.39186  | -0.70935 |
| H  | -0.33228 | 1.75711  | -2.17020 |
| H  | 2.16065  | 1.17200  | 1.34704  |
| H  | 2.16065  | 1.17200  | -1.34704 |
| C  | 0.00000  | -1.70001 | 1.14368  |
| C  | -1.31743 | -1.39186 | 0.70935  |
| C  | 0.82295  | -1.89535 | 0.00000  |
| H  | 0.33228  | -1.75711 | 2.17020  |
| C  | -1.31743 | -1.39186 | -0.70935 |
| H  | -2.16065 | -1.17200 | 1.34704  |
| C  | 0.00000  | -1.70001 | -1.14368 |
| H  | -2.16065 | -1.17200 | -1.34704 |
| H  | 0.33228  | -1.75711 | -2.17020 |

|   |          |          |          |
|---|----------|----------|----------|
| C | -2.27356 | 2.26257  | 0.00000  |
| H | -2.52179 | 2.85789  | -0.88109 |
| H | -2.92613 | 1.38696  | 0.00000  |
| H | -2.52179 | 2.85789  | 0.88109  |
| C | 2.27356  | -2.26257 | 0.00000  |
| H | 2.52179  | -2.85789 | -0.88109 |
| H | 2.92613  | -1.38696 | 0.00000  |
| H | 2.52179  | -2.85789 | 0.88109  |

24

Energy: -1060212.7781707

|    |          |          |          |
|----|----------|----------|----------|
| Fe | 0.16356  | -0.20248 | 0.00000  |
| C  | -0.38031 | 1.78075  | 0.00000  |
| C  | 0.40872  | 1.47589  | 1.14430  |
| C  | 0.40872  | 1.47589  | -1.14430 |
| C  | 1.66929  | 0.98740  | 0.70954  |
| H  | 0.08539  | 1.57135  | 2.17076  |
| C  | 1.66929  | 0.98740  | -0.70954 |
| H  | 0.08539  | 1.57135  | -2.17076 |
| H  | 2.47168  | 0.64472  | 1.34535  |
| H  | 2.47168  | 0.64472  | -1.34535 |
| C  | -0.08521 | -1.88255 | 1.14873  |
| C  | -1.34511 | -1.39553 | 0.70982  |
| C  | 0.69249  | -2.18436 | 0.00000  |
| H  | 0.23539  | -1.97847 | 2.17504  |
| C  | -1.34511 | -1.39553 | -0.70982 |
| H  | -2.15120 | -1.05888 | 1.34427  |
| C  | -0.08521 | -1.88255 | -1.14873 |
| H  | 1.70858  | -2.54897 | 0.00000  |
| H  | -2.15120 | -1.05888 | -1.34427 |
| H  | 0.23539  | -1.97847 | -2.17504 |
| C  | -1.75594 | 2.35391  | 0.00000  |
| H  | -1.72090 | 3.44810  | 0.00000  |
| H  | -2.31622 | 2.04192  | -0.88353 |
| H  | -2.31622 | 2.04192  | 0.88353  |

27

Energy: -1084863.5200659

|    |          |          |          |
|----|----------|----------|----------|
| Fe | 0.00000  | 0.00000  | 0.33761  |
| C  | 0.00000  | 1.80168  | -0.64893 |
| C  | -0.39017 | 1.97306  | 0.70918  |
| C  | 1.30438  | 1.23142  | -0.64013 |
| C  | 0.66150  | 1.51203  | 1.54545  |
| H  | -1.34084 | 2.36327  | 1.04247  |
| C  | 1.71225  | 1.05249  | 0.70891  |
| H  | 1.87375  | 0.95729  | -1.51677 |
| H  | 0.65147  | 1.48803  | 2.62464  |
| H  | 2.64335  | 0.61722  | 1.03911  |
| C  | -1.71225 | -1.05249 | 0.70891  |
| C  | -1.30438 | -1.23142 | -0.64013 |
| C  | -0.66150 | -1.51203 | 1.54545  |
| H  | -2.64335 | -0.61722 | 1.03911  |
| C  | 0.00000  | -1.80168 | -0.64893 |
| H  | -1.87375 | -0.95729 | -1.51677 |
| C  | 0.39017  | -1.97306 | 0.70918  |
| H  | -0.65147 | -1.48803 | 2.62464  |

|   |          |          |          |
|---|----------|----------|----------|
| H | 1.34084  | -2.36327 | 1.04247  |
| C | -0.78661 | 2.19533  | -1.85221 |
| H | -1.86000 | 2.12305  | -1.66630 |
| H | -0.56931 | 3.22976  | -2.13743 |
| H | -0.54813 | 1.56084  | -2.70821 |
| C | 0.78661  | -2.19533 | -1.85221 |
| H | 0.56931  | -3.22976 | -2.13743 |
| H | 0.54813  | -1.56084 | -2.70821 |
| H | 1.86000  | -2.12305 | -1.66630 |

39

Energy: -1183462.4630142

|    |          |          |          |
|----|----------|----------|----------|
| Fe | 0.00000  | 0.00000  | 0.40284  |
| C  | 0.65642  | -1.48806 | 1.63108  |
| C  | -0.39855 | -1.95852 | 0.80752  |
| C  | 1.71903  | -1.05179 | 0.79285  |
| H  | 0.64811  | -1.43542 | 2.71027  |
| C  | 0.00000  | -1.82383 | -0.55088 |
| H  | -1.35419 | -2.33264 | 1.14642  |
| C  | 1.31422  | -1.26213 | -0.56142 |
| C  | -0.65642 | 1.48806  | 1.63108  |
| C  | 0.39855  | 1.95852  | 0.80752  |
| C  | -1.71903 | 1.05179  | 0.79285  |
| H  | -0.64811 | 1.43542  | 2.71027  |
| C  | 0.00000  | 1.82383  | -0.55088 |
| H  | 1.35419  | 2.33264  | 1.14642  |
| C  | -1.31422 | 1.26213  | -0.56142 |
| C  | 2.15171  | -1.02315 | -1.77041 |
| H  | 2.75216  | -1.90759 | -2.01045 |
| H  | 1.54118  | -0.79846 | -2.64706 |
| H  | 2.84268  | -0.19061 | -1.62593 |
| C  | -0.78331 | -2.27090 | -1.73700 |
| H  | -1.85323 | -2.28321 | -1.51975 |
| H  | -0.62653 | -1.62267 | -2.60137 |
| H  | -0.49626 | -3.28544 | -2.03365 |
| C  | 3.03616  | -0.52847 | 1.25524  |
| H  | 3.77927  | -1.33118 | 1.31317  |
| H  | 3.43159  | 0.23383  | 0.58079  |
| H  | 2.95312  | -0.08390 | 2.24888  |
| C  | 0.78331  | 2.27090  | -1.73700 |
| H  | 0.62653  | 1.62267  | -2.60137 |
| H  | 0.49626  | 3.28544  | -2.03365 |
| H  | 1.85323  | 2.28321  | -1.51975 |
| C  | -2.15171 | 1.02315  | -1.77041 |
| H  | -2.75216 | 1.90759  | -2.01045 |
| H  | -1.54118 | 0.79846  | -2.64706 |
| H  | -2.84268 | 0.19061  | -1.62593 |
| C  | -3.03616 | 0.52847  | 1.25524  |
| H  | -3.77927 | 1.33118  | 1.31317  |
| H  | -3.43159 | -0.23383 | 0.58079  |
| H  | -2.95312 | 0.08390  | 2.24888  |

39

Energy: -1183462.6049505

|    |          |          |         |
|----|----------|----------|---------|
| Fe | 0.00000  | 0.00000  | 0.16078 |
| C  | -1.29275 | -1.20843 | 1.17037 |

|   |          |          |          |
|---|----------|----------|----------|
| C | -1.73166 | -1.02805 | -0.16661 |
| C | 0.00000  | -1.80112 | 1.14135  |
| H | -1.82936 | -0.91904 | 2.06277  |
| C | -0.71800 | -1.51019 | -1.03994 |
| H | -2.66495 | -0.58010 | -0.47720 |
| C | 0.35852  | -1.98672 | -0.22952 |
| C | 0.00000  | 1.80112  | 1.14135  |
| C | 1.29275  | 1.20843  | 1.17037  |
| C | -0.35852 | 1.98672  | -0.22952 |
| C | 1.73166  | 1.02805  | -0.16661 |
| H | 1.82936  | 0.91904  | 2.06277  |
| C | 0.71800  | 1.51019  | -1.03994 |
| H | 2.66495  | 0.58010  | -0.47720 |
| C | 1.60960  | -2.62597 | -0.72800 |
| H | 1.48045  | -3.70789 | -0.84342 |
| H | 1.90378  | -2.22726 | -1.70085 |
| H | 2.44222  | -2.46878 | -0.03983 |
| C | -0.80878 | -1.57929 | -2.52551 |
| H | -1.50708 | -0.83393 | -2.91164 |
| H | 0.15733  | -1.41171 | -3.00533 |
| H | -1.16736 | -2.56276 | -2.84784 |
| C | 0.80316  | -2.20207 | 2.33158  |
| H | 0.64118  | -3.25727 | 2.57679  |
| H | 1.87384  | -2.06617 | 2.16603  |
| H | 0.52383  | -1.61399 | 3.20805  |
| C | 0.80878  | 1.57929  | -2.52551 |
| H | 1.50708  | 0.83393  | -2.91164 |
| H | -0.15733 | 1.41171  | -3.00533 |
| H | 1.16736  | 2.56276  | -2.84784 |
| C | -1.60960 | 2.62597  | -0.72800 |
| H | -1.48045 | 3.70789  | -0.84342 |
| H | -1.90378 | 2.22726  | -1.70085 |
| H | -2.44222 | 2.46878  | -0.03983 |
| C | -0.80316 | 2.20207  | 2.33158  |
| H | -0.64118 | 3.25727  | 2.57679  |
| H | -1.87384 | 2.06617  | 2.16603  |
| H | -0.52383 | 1.61399  | 3.20805  |

30

Energy: -1109513.2127087

|    |          |          |          |
|----|----------|----------|----------|
| Fe | -0.16599 | 0.43102  | 0.00000  |
| C  | -1.67542 | -0.73868 | 0.70935  |
| C  | -1.67542 | -0.73868 | -0.70935 |
| C  | -0.42175 | -1.23904 | 1.15769  |
| H  | -2.47469 | -0.38916 | 1.34677  |
| C  | -0.42175 | -1.23904 | -1.15769 |
| H  | -2.47469 | -0.38916 | -1.34677 |
| C  | 0.35674  | -1.55115 | 0.00000  |
| C  | -0.46372 | 2.33167  | 0.71009  |
| C  | 0.79082  | 1.83078  | 1.14928  |
| C  | -0.46372 | 2.33167  | -0.71009 |
| H  | -1.28292 | 2.63518  | 1.34414  |
| C  | 1.56644  | 1.52160  | 0.00000  |
| H  | 1.09256  | 1.68751  | 2.17610  |
| C  | 0.79082  | 1.83078  | -1.14928 |
| H  | -1.28292 | 2.63518  | -1.34414 |
| H  | 2.56168  | 1.10250  | 0.00000  |



|   |          |          |          |
|---|----------|----------|----------|
| H | 1.09256  | 1.68751  | -2.17610 |
| C | 1.72175  | -2.14973 | 0.00000  |
| H | 1.67073  | -3.24409 | 0.00000  |
| H | 2.29141  | -1.85006 | -0.88162 |
| H | 2.29141  | -1.85006 | 0.88162  |
| C | -0.02276 | -1.44557 | -2.57899 |
| H | -0.57658 | -0.77743 | -3.24129 |
| H | 1.04240  | -1.26272 | -2.73416 |
| H | -0.22837 | -2.47290 | -2.89824 |
| C | -0.02276 | -1.44557 | 2.57899  |
| H | -0.22837 | -2.47290 | 2.89824  |
| H | 1.04240  | -1.26272 | 2.73416  |
| H | -0.57658 | -0.77743 | 3.24129  |

39

Energy: -1183462.2407378

|    |          |          |          |
|----|----------|----------|----------|
| Fe | 0.00000  | 0.00000  | 0.49894  |
| C  | 0.70906  | 1.63220  | 1.49676  |
| C  | -0.70906 | 1.63220  | 1.49676  |
| C  | 1.15727  | 1.66641  | 0.14771  |
| H  | 1.34650  | 1.58690  | 2.36802  |
| C  | -1.15727 | 1.66641  | 0.14771  |
| H  | -1.34650 | 1.58690  | 2.36802  |
| C  | 0.00000  | 1.68509  | -0.69032 |
| C  | 0.70906  | -1.63220 | 1.49676  |
| C  | 1.15727  | -1.66641 | 0.14771  |
| C  | -0.70906 | -1.63220 | 1.49676  |
| H  | 1.34650  | -1.58690 | 2.36802  |
| C  | 0.00000  | -1.68509 | -0.69032 |
| C  | -1.15727 | -1.66641 | 0.14771  |
| H  | -1.34650 | -1.58690 | 2.36802  |
| C  | 0.00000  | 1.80031  | -2.17594 |
| H  | 0.00000  | 2.85086  | -2.48701 |
| H  | -0.88107 | 1.33094  | -2.61749 |
| H  | 0.88107  | 1.33094  | -2.61749 |
| C  | -2.57626 | 1.75983  | -0.29667 |
| H  | -3.25059 | 1.32498  | 0.44353  |
| H  | -2.74501 | 1.24489  | -1.24437 |
| H  | -2.87111 | 2.80530  | -0.43727 |
| C  | 2.57626  | 1.75983  | -0.29667 |
| H  | 2.87111  | 2.80530  | -0.43727 |
| H  | 2.74501  | 1.24489  | -1.24437 |
| H  | 3.25059  | 1.32498  | 0.44353  |
| C  | 2.57626  | -1.75983 | -0.29667 |
| H  | 2.74501  | -1.24489 | -1.24437 |
| H  | 2.87111  | -2.80530 | -0.43727 |
| H  | 3.25059  | -1.32498 | 0.44353  |
| C  | 0.00000  | -1.80031 | -2.17594 |
| H  | 0.00000  | -2.85086 | -2.48701 |
| H  | 0.88107  | -1.33094 | -2.61749 |
| H  | -0.88107 | -1.33094 | -2.61749 |
| C  | -2.57626 | -1.75983 | -0.29667 |
| H  | -2.87111 | -2.80530 | -0.43727 |
| H  | -2.74501 | -1.24489 | -1.24437 |
| H  | -3.25059 | -1.32498 | 0.44353  |

39

Energy: -1183462.6049505

|    |          |          |          |
|----|----------|----------|----------|
| Fe | 0.00000  | 0.00000  | 0.16078  |
| C  | 0.00000  | -1.80113 | 1.14135  |
| C  | -0.35851 | -1.98672 | -0.22952 |
| C  | 1.29275  | -1.20843 | 1.17038  |
| C  | 0.71801  | -1.51018 | -1.03994 |
| C  | 1.73166  | -1.02805 | -0.16660 |
| H  | 1.82935  | -0.91904 | 2.06278  |
| H  | 2.66495  | -0.58010 | -0.47719 |
| C  | -0.71801 | 1.51018  | -1.03994 |
| C  | -1.73166 | 1.02805  | -0.16660 |
| C  | 0.35851  | 1.98672  | -0.22952 |
| C  | -1.29275 | 1.20843  | 1.17038  |
| H  | -2.66495 | 0.58010  | -0.47719 |
| C  | 0.00000  | 1.80113  | 1.14135  |
| H  | -1.82935 | 0.91904  | 2.06278  |
| C  | -0.80317 | -2.20208 | 2.33157  |
| H  | -0.64119 | -3.25728 | 2.57677  |
| H  | -0.52383 | -1.61400 | 3.20805  |
| H  | -1.87385 | -2.06616 | 2.16603  |
| C  | -1.60960 | -2.62596 | -0.72801 |
| H  | -1.48045 | -3.70789 | -0.84341 |
| H  | -2.44222 | -2.46877 | -0.03984 |
| H  | -1.90376 | -2.22727 | -1.70086 |
| C  | 0.80879  | -1.57928 | -2.52550 |
| H  | 1.16738  | -2.56274 | -2.84784 |
| H  | -0.15732 | -1.41170 | -3.00533 |
| H  | 1.50708  | -0.83391 | -2.91163 |
| C  | -0.80879 | 1.57928  | -2.52550 |
| H  | 0.15732  | 1.41170  | -3.00533 |
| H  | -1.50708 | 0.83391  | -2.91163 |
| H  | -1.16738 | 2.56274  | -2.84784 |
| C  | 1.60960  | 2.62596  | -0.72801 |
| H  | 1.90376  | 2.22727  | -1.70086 |
| H  | 1.48045  | 3.70789  | -0.84341 |
| H  | 2.44222  | 2.46877  | -0.03984 |
| C  | 0.80317  | 2.20208  | 2.33157  |
| H  | 1.87385  | 2.06616  | 2.16603  |
| H  | 0.64119  | 3.25728  | 2.57677  |
| H  | 0.52383  | 1.61400  | 3.20805  |

39

Energy: -1183462.2622300

|    |          |          |          |
|----|----------|----------|----------|
| Fe | 0.00000  | 0.00000  | 0.00000  |
| C  | -0.38018 | 1.65565  | 1.15706  |
| C  | 0.37407  | 2.02141  | 0.00000  |
| C  | -1.59264 | 1.06292  | 0.70944  |
| C  | -0.38018 | 1.65565  | -1.15706 |
| C  | -1.59264 | 1.06292  | -0.70944 |
| H  | -2.36546 | 0.65829  | 1.34740  |
| H  | -2.36546 | 0.65829  | -1.34740 |
| C  | 1.59264  | -1.06292 | -0.70944 |
| C  | 1.59264  | -1.06292 | 0.70944  |
| C  | 0.38018  | -1.65565 | -1.15706 |
| H  | 2.36546  | -0.65829 | -1.34740 |
| C  | 0.38018  | -1.65565 | 1.15706  |

|   |          |          |          |
|---|----------|----------|----------|
| H | 2.36546  | -0.65829 | 1.34740  |
| C | -0.37407 | -2.02141 | 0.00000  |
| C | 0.00000  | 1.90000  | 2.57754  |
| H | -0.25912 | 2.91971  | 2.88213  |
| H | -0.52380 | 1.21462  | 3.24640  |
| H | 1.07238  | 1.77383  | 2.74151  |
| C | 1.69409  | 2.71381  | 0.00000  |
| H | 1.56892  | 3.80230  | 0.00000  |
| H | 2.28355  | 2.45345  | 0.88120  |
| H | 2.28355  | 2.45345  | -0.88120 |
| C | 0.00000  | 1.90000  | -2.57754 |
| H | -0.25912 | 2.91971  | -2.88213 |
| H | 1.07238  | 1.77383  | -2.74151 |
| H | -0.52380 | 1.21462  | -3.24640 |
| C | 0.00000  | -1.90000 | -2.57754 |
| H | -1.07238 | -1.77383 | -2.74151 |
| H | 0.52380  | -1.21462 | -3.24640 |
| H | 0.25912  | -2.91971 | -2.88213 |
| C | -1.69409 | -2.71381 | 0.00000  |
| H | -2.28355 | -2.45345 | -0.88120 |
| H | -1.56892 | -3.80230 | 0.00000  |
| H | -2.28355 | -2.45345 | 0.88120  |
| C | 0.00000  | -1.90000 | 2.57754  |
| H | -1.07238 | -1.77383 | 2.74151  |
| H | 0.25912  | -2.91971 | 2.88213  |
| H | 0.52380  | -1.21462 | 3.24640  |

30

Energy: -1109512.6685639

|    |          |          |          |
|----|----------|----------|----------|
| Fe | 0.16837  | 0.42951  | 0.00000  |
| C  | 0.42044  | -1.24401 | 1.15731  |
| C  | -0.35900 | -1.55324 | 0.00000  |
| C  | 1.67540  | -0.74819 | 0.70913  |
| C  | 0.42044  | -1.24401 | -1.15731 |
| C  | 1.67540  | -0.74819 | -0.70913 |
| H  | 2.47462  | -0.39850 | 1.34665  |
| H  | 2.47462  | -0.39850 | -1.34665 |
| C  | -1.34951 | 1.61215  | -0.71027 |
| C  | -1.34951 | 1.61215  | 0.71027  |
| C  | -0.09417 | 2.10990  | -1.14883 |
| H  | -2.15441 | 1.27225  | -1.34474 |
| C  | -0.09417 | 2.10990  | 1.14883  |
| H  | -2.15441 | 1.27225  | 1.34474  |
| C  | 0.68195  | 2.41690  | 0.00000  |
| H  | 0.22435  | 2.21147  | -2.17540 |
| H  | 0.22435  | 2.21147  | 2.17540  |
| H  | 1.69456  | 2.79101  | 0.00000  |
| C  | 0.01867  | -1.44263 | 2.57879  |
| H  | 0.20955  | -2.47215 | 2.89996  |
| H  | 0.58224  | -0.78121 | 3.23953  |
| H  | -1.04363 | -1.24382 | 2.73416  |
| C  | -1.72816 | -2.14179 | 0.00000  |
| H  | -1.68520 | -3.23646 | 0.00000  |
| H  | -2.29565 | -1.83786 | 0.88155  |
| H  | -2.29565 | -1.83786 | -0.88155 |
| C  | 0.01867  | -1.44263 | -2.57879 |
| H  | 0.20955  | -2.47215 | -2.89996 |

|   |          |          |          |
|---|----------|----------|----------|
| H | -1.04363 | -1.24382 | -2.73416 |
| H | 0.58224  | -0.78121 | -3.23953 |

39

Energy: -1183462.2104228

|    |          |          |          |
|----|----------|----------|----------|
| Fe | 0.00000  | 0.00000  | 0.49942  |
| C  | 0.52014  | 1.97594  | 0.25086  |
| C  | -0.49354 | 1.61209  | -0.68792 |
| C  | 0.00000  | 1.74650  | 1.55412  |
| C  | -1.63681 | 1.16324  | 0.04264  |
| C  | -1.32174 | 1.24867  | 1.42665  |
| H  | 0.53662  | 1.90135  | 2.47908  |
| H  | -1.97388 | 0.95648  | 2.23713  |
| C  | 0.49354  | -1.61209 | -0.68792 |
| C  | 1.63681  | -1.16324 | 0.04264  |
| C  | -0.52014 | -1.97594 | 0.25086  |
| C  | 1.32174  | -1.24867 | 1.42665  |
| C  | 0.00000  | -1.74650 | 1.55412  |
| H  | 1.97388  | -0.95648 | 2.23713  |
| H  | -0.53662 | -1.90135 | 2.47908  |
| C  | 1.84929  | 2.57192  | -0.06225 |
| H  | 1.76882  | 3.65712  | -0.18701 |
| H  | 2.56231  | 2.38620  | 0.74350  |
| H  | 2.27447  | 2.16943  | -0.98343 |
| C  | -0.40512 | 1.76061  | -2.16802 |
| H  | -0.75261 | 2.75043  | -2.48410 |
| H  | 0.62133  | 1.64867  | -2.52292 |
| H  | -1.01717 | 1.02016  | -2.68619 |
| C  | -2.95325 | 0.76429  | -0.53016 |
| H  | -3.58378 | 1.64299  | -0.70356 |
| H  | -2.84543 | 0.24959  | -1.48732 |
| H  | -3.49380 | 0.10039  | 0.14692  |
| C  | 2.95325  | -0.76429 | -0.53016 |
| H  | 3.58378  | -1.64299 | -0.70356 |
| H  | 2.84543  | -0.24959 | -1.48732 |
| H  | 3.49380  | -0.10039 | 0.14692  |
| C  | 0.40512  | -1.76061 | -2.16802 |
| H  | 1.01717  | -1.02016 | -2.68619 |
| H  | 0.75261  | -2.75043 | -2.48410 |
| H  | -0.62133 | -1.64867 | -2.52292 |
| C  | -1.84929 | -2.57192 | -0.06225 |
| H  | -2.27447 | -2.16943 | -0.98343 |
| H  | -1.76882 | -3.65712 | -0.18701 |
| H  | -2.56231 | -2.38620 | 0.74350  |

39

Energy: -1183463.0885658

|    |          |          |          |
|----|----------|----------|----------|
| Fe | 0.00000  | 0.00000  | 0.14701  |
| C  | -0.96951 | -1.50022 | 1.13006  |
| C  | -1.75500 | -0.31481 | 1.15555  |
| C  | -0.73910 | -1.87983 | -0.22301 |
| H  | -0.58042 | -2.01413 | 1.99868  |
| C  | -2.01218 | 0.03437  | -0.19861 |
| C  | -1.39484 | -0.92227 | -1.05416 |
| C  | 1.75500  | 0.31481  | 1.15555  |
| C  | 2.01218  | -0.03437 | -0.19861 |

|   |          |          |          |
|---|----------|----------|----------|
| C | 0.96951  | 1.50022  | 1.13006  |
| C | 1.39484  | 0.92227  | -1.05416 |
| H | 2.56811  | -0.90163 | -0.52849 |
| C | 0.73910  | 1.87983  | -0.22301 |
| H | 0.58042  | 2.01413  | 1.99868  |
| C | -1.49259 | -0.95491 | -2.54046 |
| H | -2.33210 | -1.58106 | -2.86110 |
| H | -1.65579 | 0.04498  | -2.94749 |
| H | -0.58985 | -1.36014 | -3.00161 |
| C | 0.00000  | -3.09210 | -0.67732 |
| H | -0.68368 | -3.93388 | -0.83182 |
| H | 0.52265  | -2.91909 | -1.62031 |
| H | 0.74041  | -3.40126 | 0.06315  |
| H | -2.56811 | 0.90163  | -0.52849 |
| C | -2.25900 | 0.39242  | 2.36692  |
| H | -2.38781 | 1.46036  | 2.17909  |
| H | -3.23050 | -0.00769 | 2.67556  |
| H | -1.57372 | 0.27812  | 3.20941  |
| C | 1.49259  | 0.95491  | -2.54046 |
| H | 2.33210  | 1.58106  | -2.86110 |
| H | 1.65579  | -0.04498 | -2.94749 |
| H | 0.58985  | 1.36014  | -3.00161 |
| C | 0.00000  | 3.09210  | -0.67732 |
| H | 0.68368  | 3.93388  | -0.83182 |
| H | -0.52265 | 2.91909  | -1.62031 |
| H | -0.74041 | 3.40126  | 0.06315  |
| C | 2.25900  | -0.39242 | 2.36692  |
| H | 1.57372  | -0.27812 | 3.20941  |
| H | 2.38781  | -1.46036 | 2.17909  |
| H | 3.23050  | 0.00769  | 2.67556  |

39

Energy: -1183462.7923813

|    |          |          |          |
|----|----------|----------|----------|
| Fe | 0.00000  | 0.00000  | 0.06627  |
| C  | 0.98742  | 1.47529  | -0.93864 |
| C  | 0.72473  | 1.89729  | 0.39369  |
| C  | 1.78191  | 0.29421  | -0.90729 |
| H  | 0.62110  | 1.95902  | -1.83415 |
| C  | 1.36318  | 0.96118  | 1.25212  |
| C  | 2.02094  | -0.02478 | 0.46342  |
| C  | -1.78191 | -0.29421 | -0.90729 |
| C  | -0.98742 | -1.47529 | -0.93864 |
| C  | -2.02094 | 0.02478  | 0.46342  |
| C  | -0.72473 | -1.89729 | 0.39369  |
| H  | -0.62110 | -1.95902 | -1.83415 |
| C  | -1.36318 | -0.96118 | 1.25212  |
| H  | -1.34164 | -0.98448 | 2.33308  |
| C  | 2.87372  | -1.13017 | 0.98338  |
| H  | 3.92143  | -0.81626 | 1.04191  |
| H  | 2.56461  | -1.42943 | 1.98683  |
| H  | 2.83485  | -2.01400 | 0.34396  |
| C  | 2.31275  | -0.43357 | -2.09498 |
| H  | 3.31533  | -0.07873 | -2.35716 |
| H  | 2.38416  | -1.50812 | -1.91447 |
| H  | 1.67199  | -0.28287 | -2.96611 |
| H  | 1.34164  | 0.98448  | 2.33308  |
| C  | 0.00000  | 3.13113  | 0.80742  |

|   |          |          |          |
|---|----------|----------|----------|
| H | -0.49545 | 3.00209  | 1.77160  |
| H | 0.69524  | 3.97152  | 0.90423  |
| H | -0.75710 | 3.41655  | 0.07413  |
| C | -2.31275 | 0.43357  | -2.09498 |
| H | -3.31533 | 0.07873  | -2.35716 |
| H | -2.38416 | 1.50812  | -1.91447 |
| H | -1.67199 | 0.28287  | -2.96611 |
| C | -2.87372 | 1.13017  | 0.98338  |
| H | -2.83485 | 2.01400  | 0.34396  |
| H | -3.92143 | 0.81626  | 1.04191  |
| H | -2.56461 | 1.42943  | 1.98683  |
| C | 0.00000  | -3.13113 | 0.80742  |
| H | 0.75710  | -3.41655 | 0.07413  |
| H | 0.49545  | -3.00209 | 1.77160  |
| H | -0.69524 | -3.97152 | 0.90423  |

30

Energy: -1109513.4384427

|    |          |          |          |
|----|----------|----------|----------|
| Fe | -0.05785 | -0.35338 | 0.00000  |
| C  | 1.05904  | 0.91220  | 1.14091  |
| C  | 1.80220  | 0.50163  | 0.00000  |
| C  | -0.13281 | 1.56468  | 0.71397  |
| H  | 1.33687  | 0.72939  | 2.16984  |
| C  | 1.05904  | 0.91220  | -1.14091 |
| C  | -0.13281 | 1.56468  | -0.71397 |
| C  | -0.52655 | -1.98483 | 1.14900  |
| C  | -1.71017 | -1.33367 | 0.71032  |
| C  | 0.20567  | -2.38633 | 0.00000  |
| H  | -0.22450 | -2.12718 | 2.17557  |
| C  | -1.71017 | -1.33367 | -0.71032 |
| H  | -2.46476 | -0.89433 | 1.34553  |
| C  | -0.52655 | -1.98483 | -1.14900 |
| H  | 1.16253  | -2.88662 | 0.00000  |
| H  | -2.46476 | -0.89433 | -1.34553 |
| H  | -0.22450 | -2.12718 | -2.17557 |
| C  | -1.15943 | 2.17800  | -1.60367 |
| H  | -0.94867 | 3.23975  | -1.77062 |
| H  | -1.17617 | 1.68817  | -2.57920 |
| H  | -2.16163 | 2.10778  | -1.17612 |
| C  | -1.15943 | 2.17800  | 1.60367  |
| H  | -0.94867 | 3.23975  | 1.77062  |
| H  | -2.16163 | 2.10778  | 1.17612  |
| H  | -1.17617 | 1.68817  | 2.57920  |
| H  | 1.33687  | 0.72939  | -2.16984 |
| C  | 3.12783  | -0.17943 | 0.00000  |
| H  | 3.25129  | -0.80878 | -0.88362 |
| H  | 3.94159  | 0.55323  | 0.00000  |
| H  | 3.25129  | -0.80878 | 0.88362  |

39

Energy: -1183462.5341110

|    |          |         |          |
|----|----------|---------|----------|
| Fe | 0.00000  | 0.00000 | 0.19184  |
| C  | -1.14046 | 1.65394 | 0.57027  |
| C  | 0.00000  | 1.65247 | 1.41889  |
| C  | -0.71371 | 1.66574 | -0.78763 |
| H  | -2.16954 | 1.63287 | 0.90204  |

|   |          |          |          |
|---|----------|----------|----------|
| C | 1.14046  | 1.65394  | 0.57027  |
| C | 0.71371  | 1.66574  | -0.78763 |
| C | -1.14046 | -1.65394 | 0.57027  |
| C | -0.71371 | -1.66574 | -0.78763 |
| C | 0.00000  | -1.65247 | 1.41889  |
| H | -2.16954 | -1.63287 | 0.90204  |
| C | 0.71371  | -1.66574 | -0.78763 |
| C | 1.14046  | -1.65394 | 0.57027  |
| H | 2.16954  | -1.63287 | 0.90204  |
| C | 1.60192  | 1.75757  | -1.98014 |
| H | 1.76343  | 2.80309  | -2.26382 |
| H | 2.58036  | 1.31692  | -1.77957 |
| H | 1.17745  | 1.24808  | -2.84740 |
| C | -1.60192 | 1.75757  | -1.98014 |
| H | -1.76343 | 2.80309  | -2.26382 |
| H | -1.17745 | 1.24808  | -2.84740 |
| H | -2.58036 | 1.31692  | -1.77957 |
| H | 2.16954  | 1.63287  | 0.90204  |
| C | 0.00000  | 1.73259  | 2.90622  |
| H | 0.88337  | 1.25504  | 3.33446  |
| H | 0.00000  | 2.77738  | 3.23396  |
| H | -0.88337 | 1.25504  | 3.33446  |
| C | -1.60192 | -1.75757 | -1.98014 |
| H | -2.58036 | -1.31692 | -1.77957 |
| H | -1.17745 | -1.24808 | -2.84740 |
| H | -1.76343 | -2.80309 | -2.26382 |
| C | 1.60192  | -1.75757 | -1.98014 |
| H | 1.76343  | -2.80309 | -2.26382 |
| H | 1.17745  | -1.24808 | -2.84740 |
| H | 2.58036  | -1.31692 | -1.77957 |
| C | 0.00000  | -1.73259 | 2.90622  |
| H | 0.88337  | -1.25504 | 3.33446  |
| H | -0.88337 | -1.25504 | 3.33446  |
| H | 0.00000  | -2.77738 | 3.23396  |

39

Energy: -1183462.7923813

|    |          |          |          |
|----|----------|----------|----------|
| Fe | 0.00000  | 0.00000  | 0.06627  |
| C  | 1.36318  | 0.96118  | 1.25212  |
| C  | 2.02094  | -0.02478 | 0.46342  |
| C  | 0.72473  | 1.89729  | 0.39368  |
| C  | 1.78191  | 0.29421  | -0.90729 |
| C  | 0.98742  | 1.47529  | -0.93864 |
| H  | 0.62110  | 1.95902  | -1.83415 |
| C  | -0.98742 | -1.47529 | -0.93864 |
| C  | -0.72473 | -1.89729 | 0.39368  |
| C  | -1.78191 | -0.29421 | -0.90729 |
| H  | -0.62110 | -1.95902 | -1.83415 |
| C  | -1.36318 | -0.96118 | 1.25212  |
| C  | -2.02094 | 0.02478  | 0.46342  |
| H  | -1.34164 | -0.98448 | 2.33307  |
| C  | 2.87372  | -1.13016 | 0.98339  |
| H  | 3.92143  | -0.81625 | 1.04192  |
| H  | 2.56461  | -1.42943 | 1.98683  |
| H  | 2.83486  | -2.01399 | 0.34397  |
| C  | 2.31275  | -0.43358 | -2.09498 |
| H  | 3.31533  | -0.07874 | -2.35715 |

|   |          |          |          |
|---|----------|----------|----------|
| H | 2.38416  | -1.50813 | -1.91446 |
| H | 1.67200  | -0.28288 | -2.96611 |
| H | 1.34164  | 0.98448  | 2.33307  |
| C | -2.31275 | 0.43358  | -2.09498 |
| H | -2.38416 | 1.50813  | -1.91446 |
| H | -1.67200 | 0.28288  | -2.96611 |
| H | -3.31533 | 0.07874  | -2.35715 |
| C | -2.87372 | 1.13016  | 0.98339  |
| H | -2.83486 | 2.01399  | 0.34397  |
| H | -3.92143 | 0.81625  | 1.04192  |
| H | -2.56461 | 1.42943  | 1.98683  |
| C | 0.00000  | 3.13114  | 0.80741  |
| H | -0.75710 | 3.41655  | 0.07412  |
| H | -0.49545 | 3.00210  | 1.77159  |
| H | 0.69524  | 3.97153  | 0.90422  |
| C | 0.00000  | -3.13114 | 0.80741  |
| H | 0.75710  | -3.41655 | 0.07412  |
| H | 0.49545  | -3.00210 | 1.77159  |
| H | -0.69524 | -3.97153 | 0.90422  |

39

Energy: -1183462.4965294

|    |          |          |          |
|----|----------|----------|----------|
| Fe | 0.00000  | 0.00000  | 0.00000  |
| C  | 0.00000  | 1.69766  | 1.14060  |
| C  | 1.32583  | 1.40265  | 0.71340  |
| C  | -0.82701 | 1.88536  | 0.00000  |
| C  | 1.32583  | 1.40265  | -0.71340 |
| C  | 0.00000  | 1.69766  | -1.14060 |
| H  | -0.32848 | 1.74851  | -2.16980 |
| C  | 0.82701  | -1.88536 | 0.00000  |
| C  | 0.00000  | -1.69766 | 1.14060  |
| C  | 0.00000  | -1.69766 | -1.14060 |
| C  | -1.32583 | -1.40265 | 0.71340  |
| H  | 0.32848  | -1.74851 | 2.16980  |
| C  | -1.32583 | -1.40265 | -0.71340 |
| H  | 0.32848  | -1.74851 | -2.16980 |
| C  | 2.50245  | 1.19659  | 1.60459  |
| H  | 3.01705  | 2.14404  | 1.79755  |
| H  | 2.19807  | 0.78506  | 2.56912  |
| H  | 3.23245  | 0.51494  | 1.16407  |
| C  | 2.50245  | 1.19659  | -1.60459 |
| H  | 3.01705  | 2.14404  | -1.79755 |
| H  | 3.23245  | 0.51494  | -1.16407 |
| H  | 2.19807  | 0.78506  | -2.56912 |
| H  | -0.32848 | 1.74851  | 2.16980  |
| C  | -2.26391 | 2.27936  | 0.00000  |
| H  | -2.78168 | 1.90325  | 0.88463  |
| H  | -2.36553 | 3.36964  | 0.00000  |
| H  | -2.78168 | 1.90325  | -0.88463 |
| C  | -2.50245 | -1.19659 | -1.60459 |
| H  | -3.01705 | -2.14404 | -1.79755 |
| H  | -3.23245 | -0.51494 | -1.16407 |
| H  | -2.19807 | -0.78506 | -2.56912 |
| C  | -2.50245 | -1.19659 | 1.60459  |
| H  | -3.23245 | -0.51494 | 1.16407  |
| H  | -3.01705 | -2.14404 | 1.79755  |
| H  | -2.19807 | -0.78506 | 2.56912  |



|   |         |          |          |
|---|---------|----------|----------|
| C | 2.26391 | -2.27936 | 0.00000  |
| H | 2.78168 | -1.90325 | 0.88463  |
| H | 2.36553 | -3.36964 | 0.00000  |
| H | 2.78168 | -1.90325 | -0.88463 |

30

Energy: -1109512.9048589

|    |          |          |          |
|----|----------|----------|----------|
| Fe | 0.05443  | -0.35276 | 0.00000  |
| C  | -1.05554 | 0.92312  | 1.14057  |
| C  | 0.14036  | 1.56735  | 0.71372  |
| C  | -1.80127 | 0.51793  | 0.00000  |
| C  | 0.14036  | 1.56735  | -0.71372 |
| C  | -1.05554 | 0.92312  | -1.14057 |
| H  | -1.33303 | 0.73933  | -2.16951 |
| C  | 1.90587  | -1.23666 | 0.00000  |
| C  | 1.17182  | -1.63324 | 1.14895  |
| C  | 1.17182  | -1.63324 | -1.14895 |
| H  | 2.84522  | -0.70411 | 0.00000  |
| C  | -0.01569 | -2.27732 | 0.70968  |
| H  | 1.45438  | -1.45463 | 2.17554  |
| C  | -0.01569 | -2.27732 | -0.70968 |
| H  | 1.45438  | -1.45463 | -2.17554 |
| H  | -0.79439 | -2.67330 | 1.34411  |
| H  | -0.79439 | -2.67330 | -1.34411 |
| C  | 1.17509  | 2.16629  | 1.60349  |
| H  | 0.97916  | 3.23069  | 1.77127  |
| H  | 1.18550  | 1.67532  | 2.57851  |
| H  | 2.17613  | 2.08229  | 1.17570  |
| C  | 1.17509  | 2.16629  | -1.60349 |
| H  | 0.97916  | 3.23069  | -1.77127 |
| H  | 2.17613  | 2.08229  | -1.17570 |
| H  | 1.18550  | 1.67532  | -2.57851 |
| H  | -1.33303 | 0.73933  | 2.16951  |
| C  | -3.12827 | -0.16010 | 0.00000  |
| H  | -3.25292 | -0.78939 | 0.88347  |
| H  | -3.94057 | 0.57410  | 0.00000  |
| H  | -3.25292 | -0.78939 | -0.88347 |

39

Energy: -1183463.0885658

|    |          |          |          |
|----|----------|----------|----------|
| Fe | 0.00000  | 0.00000  | 0.14701  |
| C  | 0.96951  | -1.50022 | 1.13006  |
| C  | 0.73910  | -1.87983 | -0.22300 |
| C  | 1.75500  | -0.31481 | 1.15555  |
| C  | 1.39483  | -0.92227 | -1.05416 |
| C  | 2.01218  | 0.03437  | -0.19861 |
| H  | 2.56811  | 0.90163  | -0.52850 |
| C  | -1.39483 | 0.92227  | -1.05416 |
| C  | -2.01218 | -0.03437 | -0.19861 |
| C  | -0.73910 | 1.87983  | -0.22300 |
| C  | -1.75500 | 0.31481  | 1.15555  |
| H  | -2.56811 | -0.90163 | -0.52850 |
| C  | -0.96951 | 1.50022  | 1.13006  |
| H  | -0.58042 | 2.01412  | 1.99868  |
| C  | 0.00000  | -3.09209 | -0.67732 |
| H  | 0.68368  | -3.93388 | -0.83184 |

|   |          |          |          |
|---|----------|----------|----------|
| H | -0.74040 | -3.40127 | 0.06316  |
| H | -0.52267 | -2.91908 | -1.62030 |
| C | 1.49259  | -0.95491 | -2.54046 |
| H | 2.33209  | -1.58108 | -2.86111 |
| H | 0.58983  | -1.36013 | -3.00161 |
| H | 1.65580  | 0.04497  | -2.94749 |
| H | 0.58042  | -2.01412 | 1.99868  |
| C | 2.25900  | 0.39242  | 2.36691  |
| H | 1.57372  | 0.27813  | 3.20940  |
| H | 3.23050  | -0.00769 | 2.67556  |
| H | 2.38782  | 1.46036  | 2.17908  |
| C | -1.49259 | 0.95491  | -2.54046 |
| H | -2.33209 | 1.58108  | -2.86111 |
| H | -0.58983 | 1.36013  | -3.00161 |
| H | -1.65580 | -0.04497 | -2.94749 |
| C | 0.00000  | 3.09209  | -0.67732 |
| H | 0.52267  | 2.91908  | -1.62030 |
| H | -0.68368 | 3.93388  | -0.83184 |
| H | 0.74040  | 3.40127  | 0.06316  |
| C | -2.25900 | -0.39242 | 2.36691  |
| H | -2.38782 | -1.46036 | 2.17908  |
| H | -1.57372 | -0.27813 | 3.20940  |
| H | -3.23050 | 0.00769  | 2.67556  |

45

Energy: -1232761.6628143

|    |          |          |          |
|----|----------|----------|----------|
| Fe | 0.00000  | 0.00000  | -0.22541 |
| C  | -0.43773 | 1.69329  | -1.27029 |
| C  | -1.59442 | 0.87308  | -1.17189 |
| C  | 0.00000  | 2.03898  | 0.03700  |
| H  | 0.04822  | 1.98466  | -2.19173 |
| C  | -1.88257 | 0.70778  | 0.21621  |
| C  | -0.89582 | 1.42455  | 0.96267  |
| C  | 1.59442  | -0.87308 | -1.17189 |
| C  | 1.88257  | -0.70778 | 0.21621  |
| C  | 0.43773  | -1.69329 | -1.27029 |
| C  | 0.89582  | -1.42455 | 0.96267  |
| C  | 0.00000  | -2.03898 | 0.03700  |
| H  | -0.04822 | -1.98466 | -2.19173 |
| C  | -0.86019 | 1.58080  | 2.44424  |
| H  | -1.45980 | 2.44080  | 2.76296  |
| H  | -1.25551 | 0.70130  | 2.95570  |
| H  | 0.15719  | 1.74311  | 2.80583  |
| C  | -3.05870 | -0.00830 | 0.78547  |
| H  | -3.38634 | -0.82475 | 0.13956  |
| H  | -2.83971 | -0.43107 | 1.76801  |
| H  | -3.90862 | 0.67248  | 0.90721  |
| C  | 1.13303  | 2.94980  | 0.36416  |
| H  | 0.77983  | 3.97816  | 0.49706  |
| H  | 1.64302  | 2.65955  | 1.28465  |
| H  | 1.87373  | 2.95998  | -0.43826 |
| C  | -2.38716 | 0.33934  | -2.31614 |
| H  | -2.80751 | -0.64466 | -2.09806 |
| H  | -3.22247 | 1.00476  | -2.56021 |
| H  | -1.76835 | 0.24611  | -3.21088 |
| C  | -1.13303 | -2.94980 | 0.36416  |
| H  | -1.64302 | -2.65955 | 1.28465  |

|   |          |          |          |
|---|----------|----------|----------|
| H | -1.87373 | -2.95998 | -0.43826 |
| H | -0.77983 | -3.97816 | 0.49706  |
| C | 0.86019  | -1.58080 | 2.44424  |
| H | -0.15719 | -1.74311 | 2.80583  |
| H | 1.45980  | -2.44080 | 2.76296  |
| H | 1.25551  | -0.70130 | 2.95570  |
| C | 3.05870  | 0.00830  | 0.78547  |
| H | 2.83971  | 0.43107  | 1.76801  |
| H | 3.90862  | -0.67248 | 0.90721  |
| H | 3.38634  | 0.82475  | 0.13956  |
| C | 2.38716  | -0.33934 | -2.31614 |
| H | 2.80751  | 0.64466  | -2.09806 |
| H | 3.22247  | -1.00476 | -2.56021 |
| H | 1.76835  | -0.24611 | -3.21088 |

45

Energy: -1232761.5465808

|    |          |          |          |
|----|----------|----------|----------|
| Fe | 0.00000  | 0.00000  | -0.11119 |
| C  | -1.59484 | -1.17441 | -0.60383 |
| C  | -0.44643 | -1.59527 | -1.32781 |
| C  | -1.33210 | -1.28174 | 0.78871  |
| H  | -2.51502 | -0.81179 | -1.04194 |
| C  | 0.54823  | -1.96263 | -0.37235 |
| C  | 0.00000  | -1.77369 | 0.93412  |
| C  | -0.54823 | 1.96263  | -0.37235 |
| C  | 0.00000  | 1.77369  | 0.93412  |
| C  | 0.44643  | 1.59527  | -1.32781 |
| C  | 1.33210  | 1.28174  | 0.78871  |
| C  | 1.59484  | 1.17441  | -0.60383 |
| H  | 2.51502  | 0.81179  | -1.04194 |
| C  | 0.66587  | -2.11785 | 2.22198  |
| H  | 0.47268  | -3.16142 | 2.49454  |
| H  | 1.74846  | -1.99148 | 2.16718  |
| H  | 0.30092  | -1.49669 | 3.04257  |
| C  | 1.89785  | -2.51433 | -0.68373 |
| H  | 2.26884  | -2.14736 | -1.64255 |
| H  | 2.63049  | -2.24345 | 0.07903  |
| H  | 1.87404  | -3.60848 | -0.73950 |
| C  | -2.30733 | -1.01362 | 1.88290  |
| H  | -2.82394 | -1.93326 | 2.17846  |
| H  | -1.82507 | -0.61006 | 2.77518  |
| H  | -3.06904 | -0.29924 | 1.56326  |
| C  | -0.34161 | -1.71442 | -2.80929 |
| H  | 0.66665  | -1.49907 | -3.16886 |
| H  | -0.59361 | -2.72938 | -3.13530 |
| H  | -1.02776 | -1.02949 | -3.31077 |
| C  | 2.30733  | 1.01362  | 1.88290  |
| H  | 2.82394  | 1.93326  | 2.17846  |
| H  | 1.82507  | 0.61006  | 2.77518  |
| H  | 3.06904  | 0.29924  | 1.56326  |
| C  | -0.66587 | 2.11785  | 2.22198  |
| H  | -0.30092 | 1.49669  | 3.04257  |
| H  | -0.47268 | 3.16142  | 2.49454  |
| H  | -1.74846 | 1.99148  | 2.16718  |
| C  | -1.89785 | 2.51433  | -0.68373 |
| H  | -2.63049 | 2.24345  | 0.07903  |
| H  | -1.87404 | 3.60848  | -0.73950 |

|   |          |         |          |
|---|----------|---------|----------|
| H | -2.26884 | 2.14736 | -1.64255 |
| C | 0.34161  | 1.71442 | -2.80929 |
| H | -0.66665 | 1.49907 | -3.16886 |
| H | 0.59361  | 2.72938 | -3.13530 |
| H | 1.02776  | 1.02949 | -3.31077 |

33

Energy: -1134163.0191755

|    |          |          |          |
|----|----------|----------|----------|
| Fe | 0.05599  | 0.45623  | 0.00000  |
| C  | 1.66299  | -0.79161 | 0.00000  |
| C  | 0.87070  | -1.01896 | 1.15849  |
| C  | 0.87070  | -1.01896 | -1.15849 |
| H  | 2.69385  | -0.46497 | 0.00000  |
| C  | -0.43295 | -1.39733 | 0.71532  |
| C  | -0.43295 | -1.39733 | -0.71532 |
| C  | 0.75661  | 2.38443  | 0.00000  |
| C  | -0.04482 | 2.15117  | -1.14921 |
| C  | -0.04482 | 2.15117  | 1.14921  |
| H  | 1.79872  | 2.66605  | 0.00000  |
| C  | -1.34232 | 1.77463  | -0.71026 |
| H  | 0.28188  | 2.22418  | -2.17577 |
| C  | -1.34232 | 1.77463  | 0.71026  |
| H  | 0.28188  | 2.22418  | 2.17577  |
| H  | -2.17553 | 1.51126  | -1.34467 |
| H  | -2.17553 | 1.51126  | 1.34467  |
| C  | -1.57741 | -1.77779 | -1.59133 |
| H  | -1.57914 | -2.85520 | -1.79036 |
| H  | -2.53639 | -1.52958 | -1.13281 |
| H  | -1.52972 | -1.26834 | -2.55554 |
| C  | -1.57741 | -1.77779 | 1.59133  |
| H  | -1.52972 | -1.26834 | 2.55554  |
| H  | -2.53639 | -1.52958 | 1.13281  |
| H  | -1.57914 | -2.85520 | 1.79036  |
| C  | 1.34201  | -0.92708 | -2.56968 |
| H  | 1.67035  | -1.90509 | -2.93777 |
| H  | 0.55654  | -0.57308 | -3.24030 |
| H  | 2.18777  | -0.24204 | -2.65504 |
| C  | 1.34201  | -0.92708 | 2.56968  |
| H  | 0.55654  | -0.57308 | 3.24030  |
| H  | 1.67035  | -1.90509 | 2.93777  |
| H  | 2.18777  | -0.24204 | 2.65504  |

45

Energy: -1232761.3003461

|    |          |          |          |
|----|----------|----------|----------|
| Fe | 0.00000  | 0.00000  | 0.27585  |
| C  | 0.00000  | 1.64314  | 1.48734  |
| C  | 1.15775  | 1.65637  | 0.66354  |
| C  | -1.15775 | 1.65637  | 0.66354  |
| H  | 0.00000  | 1.61094  | 2.56835  |
| C  | 0.71479  | 1.67128  | -0.69305 |
| C  | -0.71479 | 1.67128  | -0.69305 |
| C  | 0.00000  | -1.64314 | 1.48734  |
| C  | -1.15775 | -1.65637 | 0.66354  |
| C  | 1.15775  | -1.65637 | 0.66354  |
| H  | 0.00000  | -1.61094 | 2.56835  |
| C  | -0.71479 | -1.67128 | -0.69305 |

|   |          |          |          |
|---|----------|----------|----------|
| C | 0.71479  | -1.67128 | -0.69305 |
| C | -1.58913 | 1.77085  | -1.89555 |
| H | -1.77366 | 2.81824  | -2.15932 |
| H | -1.13814 | 1.29158  | -2.76642 |
| H | -2.56069 | 1.30231  | -1.72789 |
| C | 1.58913  | 1.77085  | -1.89555 |
| H | 2.56069  | 1.30231  | -1.72789 |
| H | 1.13814  | 1.29158  | -2.76642 |
| H | 1.77366  | 2.81824  | -2.15932 |
| C | -2.56617 | 1.74203  | 1.14156  |
| H | -2.88995 | 2.78644  | 1.20728  |
| H | -3.26036 | 1.22922  | 0.47320  |
| H | -2.67350 | 1.30211  | 2.13490  |
| C | 2.56617  | 1.74203  | 1.14156  |
| H | 3.26036  | 1.22922  | 0.47320  |
| H | 2.88995  | 2.78644  | 1.20728  |
| H | 2.67350  | 1.30211  | 2.13490  |
| C | 2.56617  | -1.74203 | 1.14156  |
| H | 2.88995  | -2.78644 | 1.20728  |
| H | 3.26036  | -1.22922 | 0.47320  |
| H | 2.67350  | -1.30211 | 2.13490  |
| C | 1.58913  | -1.77085 | -1.89555 |
| H | 2.56069  | -1.30231 | -1.72789 |
| H | 1.77366  | -2.81824 | -2.15932 |
| H | 1.13814  | -1.29158 | -2.76642 |
| C | -1.58913 | -1.77085 | -1.89555 |
| H | -1.13814 | -1.29158 | -2.76642 |
| H | -1.77366 | -2.81824 | -2.15932 |
| H | -2.56069 | -1.30231 | -1.72789 |
| C | -2.56617 | -1.74203 | 1.14156  |
| H | -3.26036 | -1.22922 | 0.47320  |
| H | -2.88995 | -2.78644 | 1.20728  |
| H | -2.67350 | -1.30211 | 2.13490  |

45

Energy: -1232761.6189954

|    |          |          |          |
|----|----------|----------|----------|
| Fe | 0.00000  | 0.00000  | 0.19747  |
| C  | 0.00000  | 2.04401  | -0.04308 |
| C  | -0.87916 | 1.43409  | -0.99120 |
| C  | -0.44658 | 1.69108  | 1.26584  |
| C  | -1.87335 | 0.70695  | -0.27016 |
| C  | -1.59814 | 0.87203  | 1.11486  |
| H  | -2.15913 | 0.42418  | 1.92410  |
| C  | 0.87916  | -1.43409 | -0.99120 |
| C  | 1.87335  | -0.70695 | -0.27016 |
| C  | 0.00000  | -2.04401 | -0.04308 |
| C  | 1.59814  | -0.87203 | 1.11486  |
| C  | 0.44658  | -1.69108 | 1.26584  |
| H  | 2.15913  | -0.42418 | 1.92410  |
| C  | 1.13009  | 2.96209  | -0.35993 |
| H  | 0.78425  | 3.99993  | -0.42255 |
| H  | 1.90612  | 2.92459  | 0.40706  |
| H  | 1.59814  | 2.71781  | -1.31508 |
| C  | -0.82075 | 1.60176  | -2.47084 |
| H  | -1.39123 | 2.48156  | -2.78891 |
| H  | 0.20413  | 1.73546  | -2.82281 |
| H  | -1.23815 | 0.73797  | -2.99146 |

|   |          |          |          |
|---|----------|----------|----------|
| C | -3.03831 | -0.01885 | -0.85000 |
| H | -3.87239 | 0.66702  | -1.03394 |
| H | -2.79287 | -0.49353 | -1.80239 |
| H | -3.39607 | -0.79663 | -0.17276 |
| C | 0.13816  | 2.14496  | 2.55988  |
| H | 1.22341  | 2.25026  | 2.50320  |
| H | -0.26971 | 3.11785  | 2.85521  |
| H | -0.08691 | 1.43796  | 3.36102  |
| C | 3.03831  | 0.01885  | -0.85000 |
| H | 2.79287  | 0.49353  | -1.80239 |
| H | 3.39607  | 0.79663  | -0.17276 |
| H | 3.87239  | -0.66702 | -1.03394 |
| C | 0.82075  | -1.60176 | -2.47084 |
| H | 1.23815  | -0.73797 | -2.99146 |
| H | 1.39123  | -2.48156 | -2.78891 |
| H | -0.20413 | -1.73546 | -2.82281 |
| C | -1.13009 | -2.96209 | -0.35993 |
| H | -1.59814 | -2.71781 | -1.31508 |
| H | -0.78425 | -3.99993 | -0.42255 |
| H | -1.90612 | -2.92459 | 0.40706  |
| C | -0.13816 | -2.14496 | 2.55988  |
| H | -1.22341 | -2.25026 | 2.50320  |
| H | 0.26971  | -3.11785 | 2.85521  |
| H | 0.08691  | -1.43796 | 3.36102  |

45

Energy: -1232761.3861391

|    |          |          |          |
|----|----------|----------|----------|
| Fe | 0.00000  | 0.00000  | 0.00000  |
| C  | 0.12737  | 1.92439  | 0.71476  |
| C  | 0.12737  | 1.92439  | -0.71476 |
| C  | -1.08256 | 1.31118  | 1.15771  |
| C  | -1.08256 | 1.31118  | -1.15771 |
| C  | -1.81629 | 0.93532  | 0.00000  |
| H  | -2.77137 | 0.42757  | 0.00000  |
| C  | 1.08256  | -1.31118 | -1.15771 |
| C  | 1.81629  | -0.93532 | 0.00000  |
| C  | -0.12737 | -1.92439 | -0.71476 |
| C  | 1.08256  | -1.31118 | 1.15771  |
| H  | 2.77137  | -0.42757 | 0.00000  |
| C  | -0.12737 | -1.92439 | 0.71476  |
| C  | 1.17575  | 2.52484  | 1.58790  |
| H  | 0.98748  | 3.59180  | 1.75191  |
| H  | 1.20395  | 2.04598  | 2.56829  |
| H  | 2.17014  | 2.43434  | 1.14607  |
| C  | 1.17575  | 2.52484  | -1.58790 |
| H  | 0.98748  | 3.59180  | -1.75191 |
| H  | 2.17014  | 2.43434  | -1.14607 |
| H  | 1.20395  | 2.04598  | -2.56829 |
| C  | -1.54103 | 1.15782  | -2.56746 |
| H  | -2.05356 | 2.06279  | -2.91139 |
| H  | -0.71003 | 0.97709  | -3.25218 |
| H  | -2.24319 | 0.32735  | -2.66395 |
| C  | -1.54103 | 1.15782  | 2.56746  |
| H  | -0.71003 | 0.97709  | 3.25218  |
| H  | -2.05356 | 2.06279  | 2.91139  |
| H  | -2.24319 | 0.32735  | 2.66395  |
| C  | 1.54103  | -1.15782 | -2.56746 |

|   |          |          |          |
|---|----------|----------|----------|
| H | 0.71003  | -0.97709 | -3.25218 |
| H | 2.24319  | -0.32735 | -2.66395 |
| H | 2.05356  | -2.06279 | -2.91139 |
| C | -1.17575 | -2.52484 | -1.58790 |
| H | -1.20395 | -2.04598 | -2.56829 |
| H | -0.98748 | -3.59180 | -1.75191 |
| H | -2.17014 | -2.43434 | -1.14607 |
| C | -1.17575 | -2.52484 | 1.58790  |
| H | -2.17014 | -2.43434 | 1.14607  |
| H | -0.98748 | -3.59180 | 1.75191  |
| H | -1.20395 | -2.04598 | 2.56829  |
| C | 1.54103  | -1.15782 | 2.56746  |
| H | 0.71003  | -0.97709 | 3.25218  |
| H | 2.05356  | -2.06279 | 2.91139  |
| H | 2.24319  | -0.32735 | 2.66395  |

33

Energy: -1134162.5091735

|    |          |          |          |
|----|----------|----------|----------|
| Fe | 0.05803  | 0.45422  | 0.00000  |
| C  | -0.43432 | -1.40034 | 0.71514  |
| C  | -0.43432 | -1.40034 | -0.71514 |
| C  | 0.86997  | -1.02568 | 1.15812  |
| C  | 0.86997  | -1.02568 | -1.15812 |
| C  | 1.66262  | -0.80055 | 0.00000  |
| H  | 2.69334  | -0.47325 | 0.00000  |
| C  | -0.75885 | 1.94630  | -1.14890 |
| C  | -1.56111 | 1.71439  | 0.00000  |
| C  | 0.53873  | 2.31983  | -0.71022 |
| H  | -1.07397 | 1.83460  | -2.17564 |
| C  | -0.75885 | 1.94630  | 1.14890  |
| H  | -2.59325 | 1.39719  | 0.00000  |
| C  | 0.53873  | 2.31983  | 0.71022  |
| H  | 1.38398  | 2.54046  | -1.34466 |
| H  | -1.07397 | 1.83460  | 2.17564  |
| H  | 1.38398  | 2.54046  | 1.34466  |
| C  | -1.58192 | -1.77066 | 1.59108  |
| H  | -1.59549 | -2.84843 | 1.78745  |
| H  | -1.52769 | -1.26417 | 2.55649  |
| H  | -2.53850 | -1.51046 | 1.13415  |
| C  | -1.58192 | -1.77066 | -1.59108 |
| H  | -1.59549 | -2.84843 | -1.78745 |
| H  | -2.53850 | -1.51046 | -1.13415 |
| H  | -1.52769 | -1.26417 | -2.55649 |
| C  | 1.33934  | -0.92716 | -2.56934 |
| H  | 1.65385  | -1.90573 | -2.94769 |
| H  | 0.55730  | -0.55581 | -3.23463 |
| H  | 2.19379  | -0.25244 | -2.64993 |
| C  | 1.33934  | -0.92716 | 2.56934  |
| H  | 0.55730  | -0.55581 | 3.23463  |
| H  | 1.65385  | -1.90573 | 2.94769  |
| H  | 2.19379  | -0.25244 | 2.64993  |

45

Energy: -1232761.6628143

|    |          |         |          |
|----|----------|---------|----------|
| Fe | 0.00000  | 0.00000 | 0.22542  |
| C  | -0.89580 | 1.42456 | -0.96267 |

|   |          |          |          |
|---|----------|----------|----------|
| C | -1.88257 | 0.70778  | -0.21622 |
| C | 0.00000  | 2.03899  | -0.03698 |
| C | -1.59442 | 0.87308  | 1.17188  |
| C | -0.43774 | 1.69329  | 1.27030  |
| H | 0.04821  | 1.98464  | 2.19175  |
| C | 0.00000  | -2.03899 | -0.03698 |
| C | 0.89580  | -1.42456 | -0.96267 |
| C | 0.43774  | -1.69329 | 1.27030  |
| C | 1.88257  | -0.70778 | -0.21622 |
| C | 1.59442  | -0.87308 | 1.17188  |
| H | -0.04821 | -1.98464 | 2.19175  |
| C | -0.86016 | 1.58081  | -2.44423 |
| H | -1.45976 | 2.44081  | -2.76296 |
| H | 0.15722  | 1.74312  | -2.80582 |
| H | -1.25549 | 0.70131  | -2.95570 |
| C | -3.05870 | -0.00829 | -0.78549 |
| H | -3.90861 | 0.67250  | -0.90724 |
| H | -2.83970 | -0.43107 | -1.76803 |
| H | -3.38634 | -0.82474 | -0.13958 |
| C | -2.38718 | 0.33932  | 2.31612  |
| H | -3.22250 | 1.00472  | 2.56017  |
| H | -2.80751 | -0.64469 | 2.09805  |
| H | -1.76838 | 0.24612  | 3.21087  |
| C | 1.13304  | 2.94980  | -0.36413 |
| H | 1.64303  | 2.65955  | -1.28461 |
| H | 0.77984  | 3.97817  | -0.49703 |
| H | 1.87373  | 2.95998  | 0.43830  |
| C | 2.38718  | -0.33932 | 2.31612  |
| H | 3.22250  | -1.00472 | 2.56017  |
| H | 2.80751  | 0.64469  | 2.09805  |
| H | 1.76838  | -0.24612 | 3.21087  |
| C | 3.05870  | 0.00829  | -0.78549 |
| H | 3.38634  | 0.82474  | -0.13958 |
| H | 3.90861  | -0.67250 | -0.90724 |
| H | 2.83970  | 0.43107  | -1.76803 |
| C | 0.86016  | -1.58081 | -2.44423 |
| H | 1.25549  | -0.70131 | -2.95570 |
| H | 1.45976  | -2.44081 | -2.76296 |
| H | -0.15722 | -1.74312 | -2.80582 |
| C | -1.13304 | -2.94980 | -0.36413 |
| H | -1.64303 | -2.65955 | -1.28461 |
| H | -0.77984 | -3.97817 | -0.49703 |
| H | -1.87373 | -2.95998 | 0.43830  |

33

Energy: -1134163.0740261

|    |          |          |          |
|----|----------|----------|----------|
| Fe | 0.00000  | 0.00000  | 0.46275  |
| C  | -1.30043 | 1.21843  | 1.45721  |
| C  | 0.00000  | 1.78656  | 1.45139  |
| C  | -1.70743 | 1.06330  | 0.10671  |
| H  | -1.86473 | 0.92767  | 2.33041  |
| C  | 0.40283  | 1.98337  | 0.10017  |
| H  | 0.60191  | 2.00632  | 2.32131  |
| C  | -0.66383 | 1.53675  | -0.73847 |
| H  | -2.64140 | 0.63760  | -0.23177 |
| C  | 0.00000  | -1.78656 | 1.45139  |
| C  | -0.40283 | -1.98337 | 0.10017  |



|   |          |          |          |
|---|----------|----------|----------|
| C | 1.30043  | -1.21843 | 1.45721  |
| H | -0.60191 | -2.00632 | 2.32131  |
| C | 0.66383  | -1.53675 | -0.73847 |
| C | 1.70743  | -1.06330 | 0.10671  |
| H | 1.86473  | -0.92767 | 2.33041  |
| H | 2.64140  | -0.63760 | -0.23177 |
| C | -0.71763 | 1.62413  | -2.22478 |
| H | 0.26014  | 1.45646  | -2.68043 |
| H | -1.41026 | 0.88871  | -2.63866 |
| H | -1.06094 | 2.61416  | -2.54314 |
| C | 1.68222  | 2.60307  | -0.34824 |
| H | 2.46928  | 2.45969  | 0.39450  |
| H | 2.03025  | 2.17705  | -1.29144 |
| H | 1.56342  | 3.68120  | -0.50046 |
| C | 0.71763  | -1.62413 | -2.22478 |
| H | 1.06094  | -2.61416 | -2.54314 |
| H | -0.26014 | -1.45646 | -2.68043 |
| H | 1.41026  | -0.88871 | -2.63866 |
| C | -1.68222 | -2.60307 | -0.34824 |
| H | -2.03025 | -2.17705 | -1.29144 |
| H | -1.56342 | -3.68120 | -0.50046 |
| H | -2.46928 | -2.45969 | 0.39450  |

33

Energy: -1134163.2476392

|    |          |          |          |
|----|----------|----------|----------|
| Fe | 0.00000  | 0.00000  | 0.17842  |
| C  | 1.88557  | -0.68789 | 0.54383  |
| C  | 0.95059  | -1.34975 | 1.38172  |
| C  | 1.51668  | -0.94933 | -0.80167 |
| H  | 2.71054  | -0.07276 | 0.87110  |
| C  | 0.00000  | -2.01969 | 0.56027  |
| H  | 0.93833  | -1.32904 | 2.46190  |
| C  | 0.35315  | -1.77039 | -0.80139 |
| H  | 2.01253  | -0.56879 | -1.68338 |
| C  | 0.00000  | 2.01969  | 0.56027  |
| C  | -0.35315 | 1.77039  | -0.80139 |
| C  | -0.95059 | 1.34975  | 1.38172  |
| C  | -1.51668 | 0.94933  | -0.80167 |
| C  | -1.88557 | 0.68789  | 0.54383  |
| H  | -0.93833 | 1.32904  | 2.46190  |
| H  | -2.01253 | 0.56879  | -1.68338 |
| H  | -2.71054 | 0.07276  | 0.87110  |
| C  | -0.33251 | -2.31259 | -2.00882 |
| H  | -1.41037 | -2.40043 | -1.85854 |
| H  | -0.16651 | -1.67020 | -2.87587 |
| H  | 0.04527  | -3.30964 | -2.25927 |
| C  | -1.12482 | -2.87036 | 1.04335  |
| H  | -1.44724 | -2.56491 | 2.04061  |
| H  | -1.99012 | -2.81406 | 0.37988  |
| H  | -0.82424 | -3.92202 | 1.10042  |
| C  | 0.33251  | 2.31259  | -2.00882 |
| H  | 1.41037  | 2.40043  | -1.85854 |
| H  | 0.16651  | 1.67020  | -2.87587 |
| H  | -0.04527 | 3.30964  | -2.25927 |
| C  | 1.12482  | 2.87036  | 1.04335  |
| H  | 1.99012  | 2.81406  | 0.37988  |
| H  | 0.82424  | 3.92202  | 1.10042  |

|   |         |         |         |
|---|---------|---------|---------|
| H | 1.44724 | 2.56491 | 2.04061 |
|---|---------|---------|---------|

27

Energy: -1084863.3386278

|    |          |          |          |
|----|----------|----------|----------|
| Fe | 0.19645  | 0.36591  | 0.00000  |
| C  | 2.00188  | -0.58397 | 0.00000  |
| C  | 1.24980  | -0.95352 | 1.14530  |
| C  | 1.24980  | -0.95352 | -1.14530 |
| H  | 2.95847  | -0.08370 | 0.00000  |
| C  | 0.03089  | -1.55030 | 0.71440  |
| H  | 1.53370  | -0.78541 | 2.17411  |
| C  | 0.03089  | -1.55030 | -0.71440 |
| H  | 1.53370  | -0.78541 | -2.17411 |
| C  | 0.55747  | 2.38399  | 0.00000  |
| C  | -0.19235 | 2.01709  | -1.14905 |
| C  | -0.19235 | 2.01709  | 1.14905  |
| H  | 1.53662  | 2.83832  | 0.00000  |
| C  | -1.40555 | 1.42271  | -0.71032 |
| H  | 0.11705  | 2.14402  | -2.17540 |
| C  | -1.40555 | 1.42271  | 0.71032  |
| H  | 0.11705  | 2.14402  | 2.17540  |
| H  | -2.18015 | 1.01931  | -1.34533 |
| H  | -2.18015 | 1.01931  | 1.34533  |
| C  | -1.02396 | -2.11802 | -1.60129 |
| H  | -0.86666 | -3.19026 | -1.75930 |
| H  | -2.02183 | -1.99400 | -1.17593 |
| H  | -1.01443 | -1.63564 | -2.58054 |
| C  | -1.02396 | -2.11802 | 1.60129  |
| H  | -1.01443 | -1.63564 | 2.58054  |
| H  | -2.02183 | -1.99400 | 1.17593  |
| H  | -0.86666 | -3.19026 | 1.75930  |

33

Energy: -1134162.9018062

|    |          |          |          |
|----|----------|----------|----------|
| Fe | 0.00000  | 0.00000  | 0.56728  |
| C  | 0.00000  | 1.62520  | 1.80032  |
| C  | 1.14513  | 1.64469  | 0.96271  |
| C  | -1.14513 | 1.64469  | 0.96271  |
| H  | 0.00000  | 1.57138  | 2.87853  |
| C  | 0.71425  | 1.67857  | -0.39368 |
| H  | 2.17399  | 1.61400  | 1.29123  |
| C  | -0.71425 | 1.67857  | -0.39368 |
| H  | -2.17399 | 1.61400  | 1.29123  |
| C  | 0.00000  | -1.62520 | 1.80032  |
| C  | -1.14513 | -1.64469 | 0.96271  |
| C  | 1.14513  | -1.64469 | 0.96271  |
| H  | 0.00000  | -1.57138 | 2.87853  |
| C  | -0.71425 | -1.67857 | -0.39368 |
| H  | -2.17399 | -1.61400 | 1.29123  |
| C  | 0.71425  | -1.67857 | -0.39368 |
| H  | 2.17399  | -1.61400 | 1.29123  |
| C  | -1.60009 | 1.78407  | -1.58698 |
| H  | -1.17838 | 1.27456  | -2.45560 |
| H  | -2.58216 | 1.35043  | -1.38916 |
| H  | -1.75251 | 2.83201  | -1.86631 |
| C  | 1.60009  | 1.78407  | -1.58698 |

|   |          |          |          |
|---|----------|----------|----------|
| H | 2.58216  | 1.35043  | -1.38916 |
| H | 1.17838  | 1.27456  | -2.45560 |
| H | 1.75251  | 2.83201  | -1.86631 |
| C | 1.60009  | -1.78407 | -1.58698 |
| H | 2.58216  | -1.35043 | -1.38916 |
| H | 1.75251  | -2.83201 | -1.86631 |
| H | 1.17838  | -1.27456 | -2.45560 |
| C | -1.60009 | -1.78407 | -1.58698 |
| H | -1.17838 | -1.27456 | -2.45560 |
| H | -1.75251 | -2.83201 | -1.86631 |
| H | -2.58216 | -1.35043 | -1.38916 |

33

Energy: -1134163.2476392

|    |          |          |          |
|----|----------|----------|----------|
| Fe | 0.00000  | 0.00000  | 0.17841  |
| C  | 0.35314  | 1.77039  | -0.80139 |
| C  | 0.00000  | 2.01969  | 0.56027  |
| C  | 1.51667  | 0.94933  | -0.80168 |
| C  | 0.95060  | 1.34975  | 1.38171  |
| C  | 1.88557  | 0.68789  | 0.54382  |
| H  | 2.01251  | 0.56882  | -1.68341 |
| H  | 0.93835  | 1.32904  | 2.46190  |
| H  | 2.71056  | 0.07278  | 0.87109  |
| C  | -1.88557 | -0.68789 | 0.54382  |
| C  | -1.51667 | -0.94933 | -0.80168 |
| C  | -0.95060 | -1.34975 | 1.38171  |
| H  | -2.71056 | -0.07278 | 0.87109  |
| C  | -0.35314 | -1.77039 | -0.80139 |
| H  | -2.01251 | -0.56882 | -1.68341 |
| C  | 0.00000  | -2.01969 | 0.56027  |
| H  | -0.93835 | -1.32904 | 2.46190  |
| C  | -0.33253 | 2.31259  | -2.00881 |
| H  | 0.04523  | 3.30965  | -2.25926 |
| H  | -0.16652 | 1.67022  | -2.87586 |
| H  | -1.41040 | 2.40041  | -1.85852 |
| C  | -1.12482 | 2.87036  | 1.04336  |
| H  | -0.82425 | 3.92202  | 1.10041  |
| H  | -1.99013 | 2.81404  | 0.37989  |
| H  | -1.44723 | 2.56492  | 2.04062  |
| C  | 0.33253  | -2.31259 | -2.00881 |
| H  | 1.41040  | -2.40041 | -1.85852 |
| H  | -0.04523 | -3.30965 | -2.25926 |
| H  | 0.16652  | -1.67022 | -2.87586 |
| C  | 1.12482  | -2.87036 | 1.04336  |
| H  | 0.82425  | -3.92202 | 1.10041  |
| H  | 1.99013  | -2.81404 | 0.37989  |
| H  | 1.44723  | -2.56492 | 2.04062  |

33

Energy: -1134162.7734177

|    |          |         |          |
|----|----------|---------|----------|
| Fe | 0.00000  | 0.00000 | 0.00000  |
| C  | 1.32499  | 1.40049 | 0.71398  |
| C  | 1.32499  | 1.40049 | -0.71398 |
| C  | 0.00000  | 1.69303 | 1.14518  |
| C  | 0.00000  | 1.69303 | -1.14518 |
| C  | -0.81831 | 1.87274 | 0.00000  |

|   |          |          |          |
|---|----------|----------|----------|
| H | -0.32653 | 1.73876  | 2.17428  |
| H | -0.32653 | 1.73876  | -2.17428 |
| H | -1.87810 | 2.07988  | 0.00000  |
| C | 0.00000  | -1.69303 | -1.14518 |
| C | 0.81831  | -1.87274 | 0.00000  |
| C | -1.32499 | -1.40049 | -0.71398 |
| H | 0.32653  | -1.73876 | -2.17428 |
| C | 0.00000  | -1.69303 | 1.14518  |
| H | 1.87810  | -2.07988 | 0.00000  |
| C | -1.32499 | -1.40049 | 0.71398  |
| H | 0.32653  | -1.73876 | 2.17428  |
| C | 2.50228  | 1.17973  | 1.60101  |
| H | 3.05411  | 2.11230  | 1.75987  |
| H | 2.19143  | 0.80945  | 2.57980  |
| H | 3.20026  | 0.45570  | 1.17579  |
| C | 2.50228  | 1.17973  | -1.60101 |
| H | 3.05411  | 2.11230  | -1.75987 |
| H | 3.20026  | 0.45570  | -1.17579 |
| H | 2.19143  | 0.80945  | -2.57980 |
| C | -2.50228 | -1.17973 | 1.60101  |
| H | -2.19143 | -0.80945 | 2.57980  |
| H | -3.20026 | -0.45570 | 1.17579  |
| H | -3.05411 | -2.11230 | 1.75987  |
| C | -2.50228 | -1.17973 | -1.60101 |
| H | -3.05411 | -2.11230 | -1.75987 |
| H | -3.20026 | -0.45570 | -1.17579 |
| H | -2.19143 | -0.80945 | -2.57980 |

27

Energy: -1084862.7713467

|    |          |          |          |
|----|----------|----------|----------|
| Fe | 0.19935  | 0.36451  | 0.00000  |
| C  | 0.02870  | -1.55360 | 0.71418  |
| C  | 0.02870  | -1.55360 | -0.71418 |
| C  | 1.24963  | -0.96191 | 1.14493  |
| C  | 1.24963  | -0.96191 | -1.14493 |
| C  | 2.00292  | -0.59548 | 0.00000  |
| H  | 1.53266  | -0.79194 | 2.17375  |
| H  | 1.53266  | -0.79194 | -2.17375 |
| H  | 2.95998  | -0.09596 | 0.00000  |
| C  | -0.86009 | 1.69196  | -1.14894 |
| C  | -1.61058 | 1.32667  | 0.00000  |
| C  | 0.35388  | 2.28364  | -0.70980 |
| H  | -1.14971 | 1.52515  | -2.17554 |
| C  | -0.86009 | 1.69196  | 1.14894  |
| H  | -2.57208 | 0.83528  | 0.00000  |
| C  | 0.35388  | 2.28364  | 0.70980  |
| H  | 1.15028  | 2.64258  | -1.34406 |
| H  | -1.14971 | 1.52515  | 2.17554  |
| H  | 1.15028  | 2.64258  | 1.34406  |
| C  | -1.03241 | -2.10923 | 1.60105  |
| H  | -0.89032 | -3.18398 | 1.75597  |
| H  | -1.01459 | -1.62940 | 2.58141  |
| H  | -2.02915 | -1.96942 | 1.17781  |
| C  | -1.03241 | -2.10923 | -1.60105 |
| H  | -0.89032 | -3.18398 | -1.75597 |
| H  | -2.02915 | -1.96942 | -1.17781 |
| H  | -1.01459 | -1.62940 | -2.58141 |

33

Energy: -1134163.0735681

|    |          |          |          |
|----|----------|----------|----------|
| Fe | 0.00000  | 0.00000  | 0.46624  |
| C  | 0.68259  | 1.52852  | -0.73494 |
| C  | -0.38945 | 1.98386  | 0.09209  |
| C  | 1.71597  | 1.05320  | 0.12160  |
| C  | 0.00000  | 1.79049  | 1.44772  |
| C  | 1.29742  | 1.21579  | 1.46769  |
| H  | 2.65084  | 0.62139  | -0.20648 |
| H  | -0.60853 | 2.01686  | 2.31132  |
| H  | 1.85219  | 0.92575  | 2.34721  |
| C  | -1.71597 | -1.05320 | 0.12160  |
| C  | -0.68259 | -1.52852 | -0.73494 |
| C  | -1.29742 | -1.21579 | 1.46769  |
| H  | -2.65084 | -0.62139 | -0.20648 |
| C  | 0.38945  | -1.98386 | 0.09209  |
| C  | 0.00000  | -1.79049 | 1.44772  |
| H  | -1.85219 | -0.92575 | 2.34721  |
| H  | 0.60853  | -2.01686 | 2.31132  |
| C  | 0.75074  | 1.60990  | -2.22101 |
| H  | 1.10303  | 2.59664  | -2.53980 |
| H  | 1.44289  | 0.86881  | -2.62556 |
| H  | -0.22367 | 1.44641  | -2.68523 |
| C  | -1.66157 | 2.60791  | -0.37079 |
| H  | -1.53543 | 3.68434  | -0.52901 |
| H  | -2.00429 | 2.17769  | -1.31406 |
| H  | -2.45548 | 2.47376  | 0.36637  |
| C  | -0.75074 | -1.60990 | -2.22101 |
| H  | -1.44289 | -0.86881 | -2.62556 |
| H  | 0.22367  | -1.44641 | -2.68523 |
| H  | -1.10303 | -2.59664 | -2.53980 |
| C  | 1.66157  | -2.60791 | -0.37079 |
| H  | 1.53543  | -3.68434 | -0.52901 |
| H  | 2.00429  | -2.17769 | -1.31406 |
| H  | 2.45548  | -2.47376 | 0.36637  |

1

Energy: -792267.6421416

|    |         |         |         |
|----|---------|---------|---------|
| Fe | 0.00000 | 0.00000 | 0.00000 |
|----|---------|---------|---------|

27

Energy: -1458355.5934345

|    |          |          |          |
|----|----------|----------|----------|
| Fe | 0.00000  | 0.00000  | 0.94376  |
| C  | -0.77868 | -1.46119 | 2.15885  |
| C  | -1.76638 | -1.00210 | 1.24713  |
| C  | 0.31491  | -1.96503 | 1.41287  |
| H  | -0.83418 | -1.40471 | 3.23522  |
| C  | -1.29047 | -1.21930 | -0.06949 |
| H  | -2.70308 | -0.53367 | 1.50734  |
| C  | 0.00000  | -1.80925 | 0.03385  |
| H  | 1.23400  | -2.36923 | 1.80762  |
| H  | -1.79122 | -0.95476 | -0.98791 |
| C  | 0.77868  | 1.46119  | 2.15885  |
| C  | 1.76638  | 1.00210  | 1.24713  |

|   |          |          |          |
|---|----------|----------|----------|
| C | -0.31491 | 1.96503  | 1.41287  |
| H | 0.83418  | 1.40471  | 3.23522  |
| C | 1.29047  | 1.21930  | -0.06949 |
| H | 2.70308  | 0.53367  | 1.50734  |
| C | 0.00000  | 1.80925  | 0.03385  |
| H | -1.23400 | 2.36923  | 1.80762  |
| H | 1.79122  | 0.95476  | -0.98791 |
| C | 0.84809  | -2.25920 | -1.10047 |
| F | 0.59723  | -3.53881 | -1.42288 |
| F | 0.64091  | -1.53445 | -2.20569 |
| F | 2.15551  | -2.18746 | -0.80781 |
| C | -0.84809 | 2.25920  | -1.10047 |
| F | -0.64091 | 1.53445  | -2.20569 |
| F | -2.15551 | 2.18746  | -0.80781 |
| F | -0.59723 | 3.53881  | -1.42288 |

27

Energy: -1458356.0826723

|    |          |          |          |
|----|----------|----------|----------|
| Fe | 0.00000  | 0.00000  | 0.37156  |
| C  | -0.34979 | 1.77512  | 1.34389  |
| C  | 0.00000  | 2.01744  | -0.01084 |
| C  | -1.50725 | 0.95815  | 1.36463  |
| H  | 0.19343  | 2.12243  | 2.20925  |
| C  | -0.93833 | 1.35352  | -0.83843 |
| H  | 0.85836  | 2.57467  | -0.35361 |
| C  | -1.86658 | 0.69144  | 0.01368  |
| H  | -2.01422 | 0.57863  | 2.23805  |
| H  | -0.93816 | 1.32331  | -1.91680 |
| C  | 1.50725  | -0.95815 | 1.36463  |
| C  | 0.34979  | -1.77512 | 1.34389  |
| C  | 1.86658  | -0.69144 | 0.01368  |
| H  | 2.01422  | -0.57863 | 2.23805  |
| C  | 0.00000  | -2.01744 | -0.01084 |
| H  | -0.19343 | -2.12243 | 2.20925  |
| C  | 0.93833  | -1.35352 | -0.83843 |
| H  | -0.85836 | -2.57467 | -0.35361 |
| H  | 0.93816  | -1.32331 | -1.91680 |
| C  | -3.05070 | -0.08760 | -0.43070 |
| F  | -4.13182 | 0.69574  | -0.57325 |
| F  | -2.84787 | -0.68172 | -1.61519 |
| F  | -3.38277 | -1.04415 | 0.44838  |
| C  | 3.05070  | 0.08760  | -0.43070 |
| F  | 2.84787  | 0.68172  | -1.61519 |
| F  | 3.38277  | 1.04415  | 0.44838  |
| F  | 4.13182  | -0.69574 | -0.57325 |

24

Energy: -1246960.0212389

|    |         |          |          |
|----|---------|----------|----------|
| Fe | 0.20840 | -0.85762 | 0.00000  |
| C  | 2.09548 | -0.47122 | 0.71025  |
| C  | 2.09548 | -0.47122 | -0.71025 |
| C  | 1.18220 | 0.51643  | 1.15500  |
| H  | 2.66722 | -1.13167 | 1.34404  |
| C  | 1.18220 | 0.51643  | -1.15500 |
| H  | 2.66722 | -1.13167 | -1.34404 |
| C  | 0.61193 | 1.12254  | 0.00000  |

|   |          |          |          |
|---|----------|----------|----------|
| H | 0.93666  | 0.75470  | 2.17810  |
| H | 0.93666  | 0.75470  | -2.17810 |
| C | -0.35277 | -2.69374 | 0.71004  |
| C | -1.26408 | -1.69662 | 1.14881  |
| C | -0.35277 | -2.69374 | -0.71004 |
| H | 0.25417  | -3.32195 | 1.34417  |
| C | -1.82643 | -1.08048 | 0.00000  |
| H | -1.47079 | -1.43147 | 2.17443  |
| C | -1.26408 | -1.69662 | -1.14881 |
| H | 0.25417  | -3.32195 | -1.34417 |
| H | -2.52967 | -0.26162 | 0.00000  |
| H | -1.47079 | -1.43147 | -2.17443 |
| C | -0.35366 | 2.24955  | 0.00000  |
| F | 0.27300  | 3.43907  | 0.00000  |
| F | -1.14673 | 2.23673  | -1.08130 |
| F | -1.14673 | 2.23673  | 1.08130  |

27

Energy: -1458352.8414478

|    |          |          |          |
|----|----------|----------|----------|
| Fe | 0.00000  | 0.00000  | 1.17341  |
| C  | -0.71019 | 1.61019  | 2.21984  |
| C  | 0.71019  | 1.61019  | 2.21984  |
| C  | -1.15372 | 1.67265  | 0.87609  |
| H  | -1.34374 | 1.53660  | 3.09051  |
| C  | 1.15372  | 1.67265  | 0.87609  |
| H  | 1.34374  | 1.53660  | 3.09051  |
| C  | 0.00000  | 1.71116  | 0.04662  |
| H  | -2.17612 | 1.67692  | 0.53173  |
| H  | 2.17612  | 1.67692  | 0.53173  |
| C  | -0.71019 | -1.61019 | 2.21984  |
| C  | -1.15372 | -1.67265 | 0.87609  |
| C  | 0.71019  | -1.61019 | 2.21984  |
| H  | -1.34374 | -1.53660 | 3.09051  |
| C  | 0.00000  | -1.71116 | 0.04662  |
| H  | -2.17612 | -1.67692 | 0.53173  |
| C  | 1.15372  | -1.67265 | 0.87609  |
| H  | 1.34374  | -1.53660 | 3.09051  |
| H  | 2.17612  | -1.67692 | 0.53173  |
| C  | 0.00000  | 1.96025  | -1.41967 |
| F  | 0.00000  | 3.28322  | -1.67076 |
| F  | 1.08205  | 1.45757  | -2.02082 |
| F  | -1.08205 | 1.45757  | -2.02082 |
| C  | 0.00000  | -1.96025 | -1.41967 |
| F  | 0.00000  | -3.28322 | -1.67076 |
| F  | -1.08205 | -1.45757 | -2.02082 |
| F  | 1.08205  | -1.45757 | -2.02082 |

27

Energy: -1458356.0819444

|    |          |          |          |
|----|----------|----------|----------|
| Fe | 0.00000  | 0.00000  | 0.36961  |
| C  | 0.00000  | -1.99089 | 0.01353  |
| C  | -0.37627 | -1.74522 | 1.36385  |
| C  | -0.94230 | -1.35108 | -0.84016 |
| C  | -1.54426 | -0.94344 | 1.34115  |
| H  | 0.15475  | -2.08806 | 2.23816  |
| C  | -1.89156 | -0.70086 | -0.01418 |

|   |          |          |          |
|---|----------|----------|----------|
| H | -0.91295 | -1.34156 | -1.91850 |
| H | -2.05950 | -0.55384 | 2.20561  |
| H | -2.71191 | -0.08984 | -0.35837 |
| C | 1.54426  | 0.94344  | 1.34115  |
| C | 1.89156  | 0.70086  | -0.01418 |
| C | 0.37627  | 1.74522  | 1.36385  |
| H | 2.05950  | 0.55384  | 2.20561  |
| C | 0.94230  | 1.35108  | -0.84016 |
| H | 2.71191  | 0.08984  | -0.35837 |
| C | 0.00000  | 1.99089  | 0.01353  |
| H | -0.15475 | 2.08806  | 2.23816  |
| H | 0.91295  | 1.34156  | -1.91850 |
| C | 1.14143  | -2.83236 | -0.42867 |
| F | 2.15409  | -2.80922 | 0.44999  |
| F | 0.78183  | -4.11856 | -0.56709 |
| F | 1.62776  | -2.43966 | -1.61455 |
| C | -1.14143 | 2.83236  | -0.42867 |
| F | -0.78183 | 4.11856  | -0.56709 |
| F | -1.62776 | 2.43966  | -1.61455 |
| F | -2.15409 | 2.80922  | 0.44999  |

27

Energy: -1458355.4816751

|    |          |          |          |
|----|----------|----------|----------|
| Fe | 0.00000  | 0.00000  | 0.00000  |
| C  | 0.10289  | 2.02444  | 0.00000  |
| C  | 0.75829  | 1.51150  | 1.15412  |
| C  | 0.75829  | 1.51150  | -1.15412 |
| C  | 1.80830  | 0.67202  | 0.71016  |
| H  | 0.47633  | 1.70568  | 2.17730  |
| C  | 1.80830  | 0.67202  | -0.71016 |
| H  | 0.47633  | 1.70568  | -2.17730 |
| H  | 2.46546  | 0.09457  | 1.34216  |
| H  | 2.46546  | 0.09457  | -1.34216 |
| C  | -0.75829 | -1.51150 | 1.15412  |
| C  | -1.80830 | -0.67202 | 0.71016  |
| C  | -0.10289 | -2.02444 | 0.00000  |
| H  | -0.47633 | -1.70568 | 2.17730  |
| C  | -1.80830 | -0.67202 | -0.71016 |
| H  | -2.46546 | -0.09457 | 1.34216  |
| C  | -0.75829 | -1.51150 | -1.15412 |
| H  | -2.46546 | -0.09457 | -1.34216 |
| H  | -0.47633 | -1.70568 | -2.17730 |
| C  | -1.02768 | 2.98780  | 0.00000  |
| F  | -1.80830 | 2.84908  | 1.08124  |
| F  | -0.59353 | 4.25840  | 0.00000  |
| F  | -1.80830 | 2.84908  | -1.08124 |
| C  | 1.02768  | -2.98780 | 0.00000  |
| F  | 1.80830  | -2.84908 | 1.08124  |
| F  | 0.59353  | -4.25840 | 0.00000  |
| F  | 1.80830  | -2.84908 | -1.08124 |

24

Energy: -1246959.3687545

|    |         |          |         |
|----|---------|----------|---------|
| Fe | 0.20983 | -0.85720 | 0.00000 |
| C  | 0.61200 | 1.12630  | 0.00000 |
| C  | 1.18344 | 0.52153  | 1.15462 |



|   |          |          |          |
|---|----------|----------|----------|
| C | 1.18344  | 0.52153  | -1.15462 |
| C | 2.09861  | -0.46383 | 0.71003  |
| H | 0.93513  | 0.75722  | 2.17774  |
| C | 2.09861  | -0.46383 | -0.71003 |
| H | 0.93513  | 0.75722  | -2.17774 |
| H | 2.66897  | -1.12554 | 1.34383  |
| H | 2.66897  | -1.12554 | -1.34383 |
| C | -0.75941 | -2.25391 | 1.14826  |
| C | -1.67023 | -1.25787 | 0.71004  |
| C | -0.19520 | -2.86929 | 0.00000  |
| H | -0.51297 | -2.48036 | 2.17458  |
| C | -1.67023 | -1.25787 | -0.71004 |
| H | -2.23433 | -0.58949 | 1.34259  |
| C | -0.75941 | -2.25391 | -1.14826 |
| H | 0.55312  | -3.64730 | 0.00000  |
| H | -2.23433 | -0.58949 | -1.34259 |
| H | -0.51297 | -2.48036 | -2.17458 |
| C | -0.35726 | 2.25034  | 0.00000  |
| F | 0.26608  | 3.44164  | 0.00000  |
| F | -1.15017 | 2.23560  | -1.08131 |
| F | -1.15017 | 2.23560  | 1.08131  |

27

Energy: -1458355.5934345

|    |          |          |          |
|----|----------|----------|----------|
| Fe | 0.00000  | 0.00000  | 0.94376  |
| C  | 0.00000  | 1.80925  | 0.03385  |
| C  | -0.31491 | 1.96503  | 1.41288  |
| C  | 1.29046  | 1.21930  | -0.06950 |
| C  | 0.77869  | 1.46120  | 2.15884  |
| H  | -1.23400 | 2.36923  | 1.80762  |
| C  | 1.76638  | 1.00211  | 1.24712  |
| H  | 1.79122  | 0.95476  | -0.98791 |
| H  | 0.83418  | 1.40471  | 3.23521  |
| H  | 2.70308  | 0.53368  | 1.50734  |
| C  | -1.76638 | -1.00211 | 1.24712  |
| C  | -1.29046 | -1.21930 | -0.06950 |
| C  | -0.77869 | -1.46120 | 2.15884  |
| H  | -2.70308 | -0.53368 | 1.50734  |
| C  | 0.00000  | -1.80925 | 0.03385  |
| H  | -1.79122 | -0.95476 | -0.98791 |
| C  | 0.31491  | -1.96503 | 1.41288  |
| H  | -0.83418 | -1.40471 | 3.23521  |
| H  | 1.23400  | -2.36923 | 1.80762  |
| C  | -0.84810 | 2.25919  | -1.10047 |
| F  | -2.15552 | 2.18746  | -0.80780 |
| F  | -0.59724 | 3.53880  | -1.42289 |
| F  | -0.64092 | 1.53443  | -2.20569 |
| C  | 0.84810  | -2.25919 | -1.10047 |
| F  | 0.59724  | -3.53880 | -1.42289 |
| F  | 0.64092  | -1.53443 | -2.20569 |
| F  | 2.15552  | -2.18746 | -0.80780 |

33

Energy: -1881137.8374073

|    |         |         |         |
|----|---------|---------|---------|
| Fe | 0.00000 | 0.00000 | 0.27274 |
| C  | 0.00000 | 2.04391 | 0.53324 |

|   |          |          |          |
|---|----------|----------|----------|
| C | 0.83873  | 1.41959  | 1.48649  |
| C | 0.47472  | 1.71597  | -0.75773 |
| H | -0.87908 | 2.63049  | 0.75083  |
| C | 1.83448  | 0.68571  | 0.78678  |
| H | 0.72998  | 1.45215  | 2.55927  |
| C | 1.60835  | 0.87175  | -0.61505 |
| H | 0.03692  | 2.01334  | -1.69721 |
| C | -0.83873 | -1.41959 | 1.48649  |
| C | -1.83448 | -0.68571 | 0.78678  |
| C | 0.00000  | -2.04391 | 0.53324  |
| H | -0.72998 | -1.45215 | 2.55927  |
| C | -1.60835 | -0.87175 | -0.61505 |
| C | -0.47472 | -1.71597 | -0.75773 |
| H | 0.87908  | -2.63049 | 0.75083  |
| H | -0.03692 | -2.01334 | -1.69721 |
| C | 2.43472  | 0.37960  | -1.76310 |
| F | 2.52473  | -0.95322 | -1.82919 |
| F | 1.91567  | 0.79483  | -2.92379 |
| F | 3.68408  | 0.85266  | -1.68893 |
| C | 2.95011  | -0.03719 | 1.46702  |
| F | 2.59325  | -0.40380 | 2.70613  |
| F | 3.33384  | -1.13915 | 0.81857  |
| F | 4.02832  | 0.74681  | 1.58561  |
| C | -2.43472 | -0.37960 | -1.76310 |
| F | -3.68408 | -0.85266 | -1.68893 |
| F | -2.52473 | 0.95322  | -1.82919 |
| F | -1.91567 | -0.79483 | -2.92379 |
| C | -2.95011 | 0.03719  | 1.46702  |
| F | -3.33384 | 1.13915  | 0.81857  |
| F | -4.02832 | -0.74681 | 1.58561  |
| F | -2.59325 | 0.40380  | 2.70613  |

33

Energy: -1881137.8374073

|    |          |          |          |
|----|----------|----------|----------|
| Fe | 0.00000  | 0.00000  | 0.27274  |
| C  | 0.00000  | -2.04390 | 0.53325  |
| C  | -0.83873 | -1.41958 | 1.48650  |
| C  | -0.47472 | -1.71598 | -0.75772 |
| H  | 0.87908  | -2.63048 | 0.75086  |
| C  | -1.83448 | -0.68570 | 0.78678  |
| H  | -0.72998 | -1.45212 | 2.55927  |
| C  | -1.60834 | -0.87175 | -0.61505 |
| H  | -0.03692 | -2.01335 | -1.69720 |
| C  | 1.83448  | 0.68570  | 0.78678  |
| C  | 1.60834  | 0.87175  | -0.61505 |
| C  | 0.83873  | 1.41958  | 1.48650  |
| C  | 0.47472  | 1.71598  | -0.75772 |
| C  | 0.00000  | 2.04390  | 0.53325  |
| H  | 0.72998  | 1.45212  | 2.55927  |
| H  | 0.03692  | 2.01335  | -1.69720 |
| H  | -0.87908 | 2.63048  | 0.75086  |
| C  | -2.43471 | -0.37960 | -1.76310 |
| F  | -2.52473 | 0.95321  | -1.82918 |
| F  | -1.91565 | -0.79483 | -2.92379 |
| F  | -3.68407 | -0.85268 | -1.68894 |
| C  | -2.95012 | 0.03719  | 1.46702  |
| F  | -2.59328 | 0.40379  | 2.70614  |

|   |          |          |          |
|---|----------|----------|----------|
| F | -3.33384 | 1.13916  | 0.81858  |
| F | -4.02833 | -0.74681 | 1.58558  |
| C | 2.43471  | 0.37960  | -1.76310 |
| F | 2.52473  | -0.95321 | -1.82918 |
| F | 1.91565  | 0.79483  | -2.92379 |
| F | 3.68407  | 0.85268  | -1.68894 |
| C | 2.95012  | -0.03719 | 1.46702  |
| F | 3.33384  | -1.13916 | 0.81858  |
| F | 4.02833  | 0.74681  | 1.58558  |
| F | 2.59328  | -0.40379 | 2.70614  |

27

Energy: -1458351.9641959

|    |          |          |          |
|----|----------|----------|----------|
| Fe | -1.17192 | 0.01030  | 0.24408  |
| C  | -0.77705 | 0.00545  | 2.26502  |
| C  | -0.23155 | -1.14434 | 1.64763  |
| C  | -0.21243 | 1.14915  | 1.65307  |
| H  | -1.52300 | 0.01014  | 3.04458  |
| C  | 0.67148  | -0.71848 | 0.63493  |
| H  | -0.47097 | -2.17198 | 1.87123  |
| C  | 0.68468  | 0.71507  | 0.63845  |
| H  | -0.43233 | 2.17910  | 1.88437  |
| C  | -3.20853 | -0.03002 | 0.03840  |
| C  | -2.67914 | 1.14697  | -0.55402 |
| C  | -2.62522 | -1.14933 | -0.61218 |
| H  | -3.90875 | -0.06737 | 0.85911  |
| C  | -1.76919 | 0.75458  | -1.57051 |
| H  | -2.90575 | 2.16146  | -0.26329 |
| C  | -1.73508 | -0.66351 | -1.60625 |
| H  | -2.80221 | -2.18683 | -0.37294 |
| H  | -1.17441 | 1.41622  | -2.18079 |
| H  | -1.11188 | -1.26549 | -2.24979 |
| C  | 1.54171  | 1.64371  | -0.16007 |
| F  | 2.83744  | 1.48521  | 0.14424  |
| F  | 1.43354  | 1.48577  | -1.48306 |
| F  | 1.22580  | 2.91924  | 0.10669  |
| C  | 1.50853  | -1.66145 | -0.16093 |
| F  | 0.93328  | -2.87168 | -0.22725 |
| F  | 1.72280  | -1.25319 | -1.41369 |
| F  | 2.71270  | -1.83532 | 0.40419  |

33

Energy: -1881131.5209660

|    |          |          |         |
|----|----------|----------|---------|
| Fe | 0.00000  | 0.00000  | 1.27247 |
| C  | 0.00000  | 1.57401  | 2.58753 |
| C  | 1.14534  | 1.63162  | 1.76063 |
| C  | -1.14534 | 1.63162  | 1.76063 |
| H  | 0.00000  | 1.46053  | 3.66067 |
| C  | 0.71533  | 1.72349  | 0.40986 |
| H  | 2.17514  | 1.58908  | 2.07857 |
| C  | -0.71533 | 1.72349  | 0.40986 |
| H  | -2.17514 | 1.58908  | 2.07857 |
| C  | 0.00000  | -1.57401 | 2.58753 |
| C  | -1.14534 | -1.63162 | 1.76063 |
| C  | 1.14534  | -1.63162 | 1.76063 |
| H  | 0.00000  | -1.46053 | 3.66067 |

|   |          |          |          |
|---|----------|----------|----------|
| C | -0.71533 | -1.72349 | 0.40986  |
| H | -2.17514 | -1.58908 | 2.07857  |
| C | 0.71533  | -1.72349 | 0.40986  |
| H | 2.17514  | -1.58908 | 2.07857  |
| C | -1.66761 | 1.99778  | -0.71296 |
| F | -1.34491 | 1.41071  | -1.85758 |
| F | -2.90413 | 1.60177  | -0.38388 |
| F | -1.72823 | 3.31871  | -0.94606 |
| C | 1.66761  | 1.99778  | -0.71296 |
| F | 2.90413  | 1.60177  | -0.38388 |
| F | 1.34491  | 1.41071  | -1.85758 |
| F | 1.72823  | 3.31871  | -0.94606 |
| C | 1.66761  | -1.99778 | -0.71296 |
| F | 2.90413  | -1.60177 | -0.38388 |
| F | 1.72823  | -3.31871 | -0.94606 |
| F | 1.34491  | -1.41071 | -1.85758 |
| C | -1.66761 | -1.99778 | -0.71296 |
| F | -1.34491 | -1.41071 | -1.85758 |
| F | -1.72823 | -3.31871 | -0.94606 |
| F | -2.90413 | -1.60177 | -0.38388 |

33

Energy: -1881137.8374073

|    |          |          |          |
|----|----------|----------|----------|
| Fe | 0.00000  | 0.00000  | 0.27273  |
| C  | -1.60835 | 0.87175  | -0.61505 |
| C  | -1.83448 | 0.68570  | 0.78678  |
| C  | -0.47473 | 1.71597  | -0.75774 |
| C  | -0.83873 | 1.41959  | 1.48649  |
| C  | 0.00000  | 2.04390  | 0.53324  |
| H  | -0.03693 | 2.01334  | -1.69722 |
| H  | -0.72997 | 1.45213  | 2.55926  |
| H  | 0.87908  | 2.63048  | 0.75084  |
| C  | 0.00000  | -2.04390 | 0.53324  |
| C  | 0.47473  | -1.71597 | -0.75774 |
| C  | 0.83873  | -1.41959 | 1.48649  |
| H  | -0.87908 | -2.63048 | 0.75084  |
| C  | 1.60835  | -0.87175 | -0.61505 |
| H  | 0.03693  | -2.01334 | -1.69722 |
| C  | 1.83448  | -0.68570 | 0.78678  |
| H  | 0.72997  | -1.45213 | 2.55926  |
| C  | -2.43473 | 0.37960  | -1.76310 |
| F  | -3.68409 | 0.85266  | -1.68892 |
| F  | -1.91568 | 0.79483  | -2.92379 |
| F  | -2.52474 | -0.95322 | -1.82919 |
| C  | -2.95012 | -0.03718 | 1.46702  |
| F  | -4.02832 | 0.74682  | 1.58559  |
| F  | -3.33385 | -1.13915 | 0.81858  |
| F  | -2.59327 | -0.40378 | 2.70614  |
| C  | 2.43473  | -0.37960 | -1.76310 |
| F  | 2.52474  | 0.95322  | -1.82919 |
| F  | 3.68409  | -0.85266 | -1.68892 |
| F  | 1.91568  | -0.79483 | -2.92379 |
| C  | 2.95012  | 0.03718  | 1.46702  |
| F  | 4.02832  | -0.74682 | 1.58559  |
| F  | 3.33385  | 1.13915  | 0.81858  |
| F  | 2.59327  | 0.40378  | 2.70614  |

33

Energy: -1881137.4601799

|    |          |          |          |
|----|----------|----------|----------|
| Fe | 0.00000  | 0.00000  | 0.00000  |
| C  | -0.66017 | 1.78012  | 0.71643  |
| C  | -0.66017 | 1.78012  | -0.71643 |
| C  | -1.53334 | 0.74464  | 1.14565  |
| C  | -1.53334 | 0.74464  | -1.14565 |
| C  | -2.06051 | 0.10541  | 0.00000  |
| H  | -1.71675 | 0.47572  | 2.17413  |
| H  | -1.71675 | 0.47572  | -2.17413 |
| H  | -2.70809 | -0.75726 | 0.00000  |
| C  | 1.53334  | -0.74464 | -1.14565 |
| C  | 2.06051  | -0.10541 | 0.00000  |
| C  | 0.66017  | -1.78012 | -0.71643 |
| H  | 1.71675  | -0.47572 | -2.17413 |
| C  | 1.53334  | -0.74464 | 1.14565  |
| H  | 2.70809  | 0.75726  | 0.00000  |
| C  | 0.66017  | -1.78012 | 0.71643  |
| H  | 1.71675  | -0.47572 | 2.17413  |
| C  | 0.02550  | 2.72140  | 1.65483  |
| F  | -0.55067 | 3.92887  | 1.62973  |
| F  | -0.05240 | 2.26941  | 2.91296  |
| F  | 1.32081  | 2.89974  | 1.37927  |
| C  | 0.02550  | 2.72140  | -1.65483 |
| F  | -0.55067 | 3.92887  | -1.62973 |
| F  | 1.32081  | 2.89974  | -1.37927 |
| F  | -0.05240 | 2.26941  | -2.91296 |
| C  | -0.02550 | -2.72140 | 1.65483  |
| F  | 0.05240  | -2.26941 | 2.91296  |
| F  | -1.32081 | -2.89974 | 1.37927  |
| F  | 0.55067  | -3.92887 | 1.62973  |
| C  | -0.02550 | -2.72140 | -1.65483 |
| F  | 0.55067  | -3.92887 | -1.62973 |
| F  | -1.32081 | -2.89974 | -1.37927 |
| F  | 0.05240  | -2.26941 | -2.91296 |

27

Energy: -1458351.9584981

|    |          |          |          |
|----|----------|----------|----------|
| Fe | -0.24404 | 1.17608  | 0.00000  |
| C  | -0.64464 | -0.67129 | -0.71706 |
| C  | -0.64464 | -0.67129 | 0.71706  |
| C  | -1.65517 | 0.23278  | -1.14654 |
| C  | -1.65517 | 0.23278  | 1.14654  |
| C  | -2.26737 | 0.79053  | 0.00000  |
| H  | -1.88120 | 0.46361  | -2.17536 |
| H  | -1.88120 | 0.46361  | 2.17536  |
| H  | -3.04357 | 1.53999  | 0.00000  |
| C  | 1.59174  | 1.74586  | 0.70948  |
| C  | 1.59174  | 1.74586  | -0.70948 |
| C  | 0.59079  | 2.65204  | 1.14884  |
| H  | 2.21598  | 1.13318  | 1.34151  |
| C  | 0.59079  | 2.65204  | -1.14884 |
| H  | 2.21598  | 1.13318  | -1.34151 |
| C  | -0.02802 | 3.21210  | 0.00000  |
| H  | 0.32681  | 2.85561  | 2.17544  |
| H  | 0.32681  | 2.85561  | -2.17544 |

|   |          |          |          |
|---|----------|----------|----------|
| H | -0.84534 | 3.91726  | 0.00000  |
| C | 0.14615  | -1.52043 | -1.65651 |
| F | -0.30012 | -2.78508 | -1.65714 |
| F | 0.03371  | -1.06486 | -2.91291 |
| F | 1.45024  | -1.57080 | -1.37200 |
| C | 0.14615  | -1.52043 | 1.65651  |
| F | -0.30012 | -2.78508 | 1.65714  |
| F | 1.45024  | -1.57080 | 1.37200  |
| F | 0.03371  | -1.06486 | 2.91291  |

33

Energy: -1881132.3492785

|    |          |          |          |
|----|----------|----------|----------|
| Fe | 0.00000  | 0.00000  | 1.24925  |
| C  | 0.00000  | 1.93443  | 0.58343  |
| C  | -1.22652 | 1.29027  | 0.22307  |
| C  | 0.10159  | 1.90769  | 1.99921  |
| C  | -1.85728 | 0.86970  | 1.42432  |
| C  | -1.03875 | 1.24790  | 2.51226  |
| H  | 0.93282  | 2.29600  | 2.56660  |
| H  | -2.78889 | 0.32819  | 1.47407  |
| H  | -1.22797 | 1.02826  | 3.55183  |
| C  | -0.10159 | -1.90769 | 1.99921  |
| C  | 0.00000  | -1.93443 | 0.58343  |
| C  | 1.03875  | -1.24790 | 2.51226  |
| H  | -0.93282 | -2.29600 | 2.56660  |
| C  | 1.22652  | -1.29027 | 0.22307  |
| C  | 1.85728  | -0.86970 | 1.42432  |
| H  | 1.22797  | -1.02826 | 3.55183  |
| H  | 2.78889  | -0.32819 | 1.47407  |
| C  | 0.97482  | 2.67447  | -0.27729 |
| F  | 0.52815  | 3.91313  | -0.53011 |
| F  | 2.15095  | 2.80428  | 0.35467  |
| F  | 1.20846  | 2.09153  | -1.44720 |
| C  | -1.91018 | 1.23579  | -1.10943 |
| F  | -2.39425 | 2.44959  | -1.41986 |
| F  | -1.12787 | 0.85752  | -2.11148 |
| F  | -2.95244 | 0.39757  | -1.06448 |
| C  | -0.97482 | -2.67447 | -0.27729 |
| F  | -2.15095 | -2.80428 | 0.35467  |
| F  | -1.20846 | -2.09153 | -1.44720 |
| F  | -0.52815 | -3.91313 | -0.53011 |
| C  | 1.91018  | -1.23579 | -1.10943 |
| F  | 2.39425  | -2.44959 | -1.41986 |
| F  | 1.12787  | -0.85752 | -2.11148 |
| F  | 2.95244  | -0.39757 | -1.06448 |

39

Energy: -2303910.0976541

|    |          |          |          |
|----|----------|----------|----------|
| Fe | 0.00000  | 0.00000  | 0.60988  |
| C  | -0.98103 | -1.28094 | 1.87390  |
| C  | -1.84477 | -0.90736 | 0.82598  |
| C  | 0.15969  | -1.90276 | 1.30580  |
| H  | -1.12758 | -1.08649 | 2.92478  |
| C  | -1.25669 | -1.30153 | -0.40194 |
| H  | -2.77988 | -0.37904 | 0.92213  |
| C  | 0.00000  | -1.92244 | -0.11592 |

|   |          |          |          |
|---|----------|----------|----------|
| C | 0.98103  | 1.28094  | 1.87390  |
| C | 1.84477  | 0.90736  | 0.82598  |
| C | -0.15969 | 1.90276  | 1.30580  |
| H | 1.12758  | 1.08649  | 2.92478  |
| C | 1.25669  | 1.30153  | -0.40194 |
| H | 2.77988  | 0.37904  | 0.92213  |
| C | 0.00000  | 1.92244  | -0.11592 |
| C | 0.92579  | -2.62133 | -1.07859 |
| F | 1.05527  | -3.90583 | -0.72337 |
| F | 0.46113  | -2.59171 | -2.32216 |
| F | 2.14848  | -2.09010 | -1.09391 |
| C | -1.99164 | -1.19473 | -1.71268 |
| F | -3.15206 | -0.55657 | -1.53086 |
| F | -1.31880 | -0.54456 | -2.65539 |
| F | -2.28519 | -2.41263 | -2.18016 |
| C | 1.25167  | -2.49574 | 2.14410  |
| F | 1.03006  | -3.79402 | 2.36166  |
| F | 2.46123  | -2.37939 | 1.59897  |
| F | 1.29287  | -1.89530 | 3.34308  |
| C | 1.99164  | 1.19473  | -1.71268 |
| F | 1.31880  | 0.54456  | -2.65539 |
| F | 2.28519  | 2.41263  | -2.18016 |
| F | 3.15206  | 0.55657  | -1.53086 |
| C | -0.92579 | 2.62133  | -1.07859 |
| F | -1.05527 | 3.90583  | -0.72337 |
| F | -0.46113 | 2.59171  | -2.32216 |
| F | -2.14848 | 2.09010  | -1.09391 |
| C | -1.25167 | 2.49574  | 2.14410  |
| F | -1.03006 | 3.79402  | 2.36166  |
| F | -2.46123 | 2.37939  | 1.59897  |
| F | -1.29287 | 1.89530  | 3.34308  |

39

Energy: -2303911.7937558

|    |          |          |          |
|----|----------|----------|----------|
| Fe | 0.00000  | 0.00000  | 0.33271  |
| C  | 1.46546  | 0.97241  | 1.39831  |
| C  | 1.91712  | 0.73304  | 0.08583  |
| C  | 0.28207  | 1.75397  | 1.32836  |
| H  | 1.90607  | 0.59309  | 2.30618  |
| C  | 1.02482  | 1.36925  | -0.81229 |
| H  | 2.76997  | 0.13916  | -0.20219 |
| C  | 0.00000  | 2.01286  | -0.05059 |
| C  | -0.28207 | -1.75397 | 1.32836  |
| C  | -1.46546 | -0.97241 | 1.39831  |
| C  | 0.00000  | -2.01286 | -0.05059 |
| C  | -1.91712 | -0.73304 | 0.08583  |
| H  | -1.90607 | -0.59309 | 2.30618  |
| C  | -1.02482 | -1.36925 | -0.81229 |
| H  | -2.76997 | -0.13916 | -0.20219 |
| C  | -1.07397 | 2.90768  | -0.61784 |
| F  | -0.53919 | 3.78217  | -1.47296 |
| F  | -2.01881 | 2.23111  | -1.27568 |
| F  | -1.68017 | 3.60824  | 0.33885  |
| C  | 1.28785  | 1.47236  | -2.28603 |
| F  | 2.05388  | 0.46201  | -2.69992 |
| F  | 0.17614  | 1.47774  | -3.01580 |
| F  | 1.95118  | 2.60488  | -2.55202 |

|   |          |          |          |
|---|----------|----------|----------|
| C | -0.44105 | 2.23429  | 2.55481  |
| F | -0.23475 | 3.53643  | 2.75659  |
| F | -1.76146 | 2.03472  | 2.50504  |
| F | 0.01318  | 1.58803  | 3.63450  |
| C | -1.28785 | -1.47236 | -2.28603 |
| F | -2.05388 | -0.46201 | -2.69992 |
| F | -0.17614 | -1.47774 | -3.01580 |
| F | -1.95118 | -2.60488 | -2.55202 |
| C | 1.07397  | -2.90768 | -0.61784 |
| F | 0.53919  | -3.78217 | -1.47296 |
| F | 2.01881  | -2.23111 | -1.27568 |
| F | 1.68017  | -3.60824 | 0.33885  |
| C | 0.44105  | -2.23429 | 2.55481  |
| F | 0.23475  | -3.53643 | 2.75659  |
| F | 1.76146  | -2.03472 | 2.50504  |
| F | -0.01318 | -1.58803 | 3.63450  |

30

Energy: -1669742.0558807

|    |          |          |          |
|----|----------|----------|----------|
| Fe | -1.18780 | -0.05486 | 0.00000  |
| C  | -0.52395 | -1.86905 | 0.70447  |
| C  | -0.52395 | -1.86905 | -0.70447 |
| C  | 0.30641  | -0.80827 | 1.15209  |
| H  | -1.07555 | -2.53724 | 1.34586  |
| C  | 0.30641  | -0.80827 | -1.15209 |
| H  | -1.07555 | -2.53724 | -1.34586 |
| C  | 0.83099  | -0.13655 | 0.00000  |
| C  | -3.09363 | 0.19649  | 0.71000  |
| C  | -2.26385 | 1.26132  | 1.14809  |
| C  | -3.09363 | 0.19649  | -0.71000 |
| H  | -3.60885 | -0.50773 | 1.34544  |
| C  | -1.74960 | 1.91803  | 0.00000  |
| H  | -2.02985 | 1.50331  | 2.17293  |
| C  | -2.26385 | 1.26132  | -1.14809 |
| H  | -3.60885 | -0.50773 | -1.34544 |
| H  | -1.05908 | 2.74762  | 0.00000  |
| H  | -2.02985 | 1.50331  | -2.17293 |
| C  | 1.86107  | 0.94972  | 0.00000  |
| F  | 3.09584  | 0.43167  | 0.00000  |
| F  | 1.76282  | 1.73456  | -1.07564 |
| F  | 1.76282  | 1.73456  | 1.07564  |
| C  | 0.62509  | -0.57606 | -2.59927 |
| F  | -0.01080 | -1.47902 | -3.35942 |
| F  | 0.27108  | 0.62824  | -3.05567 |
| F  | 1.93535  | -0.71508 | -2.82933 |
| C  | 0.62509  | -0.57606 | 2.59927  |
| F  | 1.93535  | -0.71508 | 2.82933  |
| F  | 0.27108  | 0.62824  | 3.05567  |
| F  | -0.01080 | -1.47902 | 3.35942  |

39

Energy: -2303902.4581091

|    |          |         |         |
|----|----------|---------|---------|
| Fe | 0.00000  | 0.00000 | 0.90435 |
| C  | 0.70320  | 1.59222 | 1.99853 |
| C  | -0.70320 | 1.59222 | 1.99853 |
| C  | 1.15056  | 1.69677 | 0.65726 |



|   |          |          |          |
|---|----------|----------|----------|
| H | 1.34728  | 1.50492  | 2.85889  |
| C | -1.15056 | 1.69677  | 0.65726  |
| H | -1.34728 | 1.50492  | 2.85889  |
| C | 0.00000  | 1.75429  | -0.19288 |
| C | 0.70320  | -1.59222 | 1.99853  |
| C | 1.15056  | -1.69677 | 0.65726  |
| C | -0.70320 | -1.59222 | 1.99853  |
| H | 1.34728  | -1.50492 | 2.85889  |
| C | 0.00000  | -1.75429 | -0.19288 |
| C | -1.15056 | -1.69677 | 0.65726  |
| H | -1.34728 | -1.50492 | 2.85889  |
| C | 0.00000  | 2.06815  | -1.66602 |
| F | 0.00000  | 3.39801  | -1.83443 |
| F | -1.07205 | 1.58663  | -2.28547 |
| F | 1.07205  | 1.58663  | -2.28547 |
| C | -2.59905 | 1.97177  | 0.34974  |
| F | -3.35306 | 1.65128  | 1.41062  |
| F | -3.09311 | 1.33323  | -0.69651 |
| F | -2.75674 | 3.28506  | 0.13373  |
| C | 2.59905  | 1.97177  | 0.34974  |
| F | 2.75674  | 3.28506  | 0.13373  |
| F | 3.09311  | 1.33323  | -0.69651 |
| F | 3.35306  | 1.65128  | 1.41062  |
| C | 2.59905  | -1.97177 | 0.34974  |
| F | 3.09311  | -1.33323 | -0.69651 |
| F | 2.75674  | -3.28506 | 0.13373  |
| F | 3.35306  | -1.65128 | 1.41062  |
| C | 0.00000  | -2.06815 | -1.66602 |
| F | 0.00000  | -3.39801 | -1.83443 |
| F | 1.07205  | -1.58663 | -2.28547 |
| F | -1.07205 | -1.58663 | -2.28547 |
| C | -2.59905 | -1.97177 | 0.34974  |
| F | -2.75674 | -3.28506 | 0.13373  |
| F | -3.09311 | -1.33323 | -0.69651 |
| F | -3.35306 | -1.65128 | 1.41062  |

39

Energy: -2303909.9446360

|    |          |          |          |
|----|----------|----------|----------|
| Fe | 0.00000  | 0.00000  | 0.55309  |
| C  | 0.07114  | 1.88472  | 1.32478  |
| C  | 0.00000  | 1.94339  | -0.10263 |
| C  | -1.08806 | 1.21885  | 1.79757  |
| C  | -1.22262 | 1.30930  | -0.48818 |
| C  | -1.87635 | 0.86281  | 0.68604  |
| H  | -1.29902 | 0.99250  | 2.83081  |
| H  | -2.80383 | 0.31415  | 0.70884  |
| C  | 1.22262  | -1.30930 | -0.48818 |
| C  | 1.87635  | -0.86281 | 0.68604  |
| C  | 0.00000  | -1.94339 | -0.10263 |
| C  | 1.08806  | -1.21885 | 1.79757  |
| H  | 2.80383  | -0.31415 | 0.70884  |
| C  | -0.07114 | -1.88472 | 1.32478  |
| H  | 1.29902  | -0.99250 | 2.83081  |
| C  | 1.10832  | 2.47406  | 2.24009  |
| F  | 1.22593  | 3.78762  | 2.04607  |
| F  | 0.74830  | 2.28345  | 3.51563  |
| F  | 2.32354  | 1.93716  | 2.09730  |

|   |          |          |          |
|---|----------|----------|----------|
| C | 0.93899  | 2.70846  | -0.99080 |
| F | 0.61167  | 4.00525  | -0.99322 |
| F | 2.20209  | 2.61704  | -0.56715 |
| F | 0.90055  | 2.28225  | -2.24819 |
| C | -1.88320 | 1.26720  | -1.84141 |
| F | -2.10579 | 2.51448  | -2.27360 |
| F | -1.19162 | 0.63330  | -2.77671 |
| F | -3.07171 | 0.66004  | -1.74261 |
| C | 1.88320  | -1.26720 | -1.84141 |
| F | 1.19162  | -0.63330 | -2.77671 |
| F | 3.07171  | -0.66004 | -1.74261 |
| F | 2.10579  | -2.51448 | -2.27360 |
| C | -0.93899 | -2.70846 | -0.99080 |
| F | -0.90055 | -2.28225 | -2.24819 |
| F | -0.61167 | -4.00525 | -0.99322 |
| F | -2.20209 | -2.61704 | -0.56715 |
| C | -1.10832 | -2.47406 | 2.24009  |
| F | -2.32354 | -1.93716 | 2.09730  |
| F | -1.22593 | -3.78762 | 2.04607  |
| F | -0.74830 | -2.28345 | 3.51563  |

39

Energy: -2303912.4343927

|    |          |          |          |
|----|----------|----------|----------|
| Fe | 0.00000  | 0.00000  | 0.00000  |
| C  | -0.87389 | 1.45775  | 1.14972  |
| C  | -0.24055 | 2.02278  | 0.00000  |
| C  | -1.86294 | 0.54433  | 0.70500  |
| C  | -0.87389 | 1.45775  | -1.14972 |
| C  | -1.86294 | 0.54433  | -0.70500 |
| H  | -2.47841 | -0.06492 | 1.34791  |
| H  | -2.47841 | -0.06492 | -1.34791 |
| C  | 1.86294  | -0.54433 | -0.70500 |
| C  | 1.86294  | -0.54433 | 0.70500  |
| C  | 0.87389  | -1.45775 | -1.14972 |
| H  | 2.47841  | 0.06492  | -1.34791 |
| C  | 0.87389  | -1.45775 | 1.14972  |
| H  | 2.47841  | 0.06492  | 1.34791  |
| C  | 0.24055  | -2.02278 | 0.00000  |
| C  | -0.66872 | 1.83224  | 2.59267  |
| F  | -0.76669 | 3.15601  | 2.74762  |
| F  | -1.61119 | 1.26935  | 3.35152  |
| F  | 0.51457  | 1.45827  | 3.08184  |
| C  | 0.81154  | 3.09382  | 0.00000  |
| F  | 0.25520  | 4.30632  | 0.00000  |
| F  | 1.59865  | 3.01161  | 1.07514  |
| F  | 1.59865  | 3.01161  | -1.07514 |
| C  | -0.66872 | 1.83224  | -2.59267 |
| F  | -0.76669 | 3.15601  | -2.74762 |
| F  | 0.51457  | 1.45827  | -3.08184 |
| F  | -1.61119 | 1.26935  | -3.35152 |
| C  | 0.66872  | -1.83224 | -2.59267 |
| F  | -0.51457 | -1.45827 | -3.08184 |
| F  | 1.61119  | -1.26935 | -3.35152 |
| F  | 0.76669  | -3.15601 | -2.74762 |
| C  | -0.81154 | -3.09382 | 0.00000  |
| F  | -1.59865 | -3.01161 | -1.07514 |
| F  | -0.25520 | -4.30632 | 0.00000  |

|   |          |          |         |
|---|----------|----------|---------|
| F | -1.59865 | -3.01161 | 1.07514 |
| C | 0.66872  | -1.83224 | 2.59267 |
| F | -0.51457 | -1.45827 | 3.08184 |
| F | 0.76669  | -3.15601 | 2.74762 |
| F | 1.61119  | -1.26935 | 3.35152 |

30

Energy: -1669742.0558807

|    |          |          |          |
|----|----------|----------|----------|
| Fe | 1.18780  | -0.05485 | 0.00000  |
| C  | -0.30642 | -0.80827 | 1.15209  |
| C  | -0.83099 | -0.13655 | 0.00000  |
| C  | 0.52396  | -1.86905 | 0.70447  |
| C  | -0.30642 | -0.80827 | -1.15209 |
| C  | 0.52396  | -1.86905 | -0.70447 |
| H  | 1.07556  | -2.53723 | 1.34586  |
| H  | 1.07556  | -2.53723 | -1.34586 |
| C  | 1.74960  | 1.91804  | 0.00000  |
| C  | 2.26385  | 1.26132  | 1.14810  |
| C  | 2.26385  | 1.26132  | -1.14810 |
| H  | 1.05907  | 2.74763  | 0.00000  |
| C  | 3.09363  | 0.19650  | 0.70999  |
| H  | 2.02986  | 1.50329  | 2.17294  |
| C  | 3.09363  | 0.19650  | -0.70999 |
| H  | 2.02986  | 1.50329  | -2.17294 |
| H  | 3.60885  | -0.50773 | 1.34542  |
| H  | 3.60885  | -0.50773 | -1.34542 |
| C  | -0.62509 | -0.57606 | 2.59928  |
| F  | -1.93535 | -0.71508 | 2.82933  |
| F  | 0.01081  | -1.47902 | 3.35942  |
| F  | -0.27108 | 0.62824  | 3.05568  |
| C  | -1.86108 | 0.94972  | 0.00000  |
| F  | -3.09585 | 0.43166  | 0.00000  |
| F  | -1.76283 | 1.73455  | 1.07564  |
| F  | -1.76283 | 1.73455  | -1.07564 |
| C  | -0.62509 | -0.57606 | -2.59928 |
| F  | -1.93535 | -0.71508 | -2.82933 |
| F  | -0.27108 | 0.62824  | -3.05568 |
| F  | 0.01081  | -1.47902 | -3.35942 |

39

Energy: -2303910.0976541

|    |          |          |          |
|----|----------|----------|----------|
| Fe | 0.00000  | 0.00000  | 0.60989  |
| C  | 0.15972  | 1.90276  | 1.30579  |
| C  | 0.00000  | 1.92243  | -0.11592 |
| C  | -0.98100 | 1.28095  | 1.87392  |
| C  | -1.25670 | 1.30154  | -0.40191 |
| C  | -1.84476 | 0.90737  | 0.82602  |
| H  | -1.12753 | 1.08652  | 2.92481  |
| H  | -2.77987 | 0.37906  | 0.92218  |
| C  | 0.00000  | -1.92243 | -0.11592 |
| C  | 1.25670  | -1.30154 | -0.40191 |
| C  | -0.15972 | -1.90276 | 1.30579  |
| C  | 1.84476  | -0.90737 | 0.82602  |
| C  | 0.98100  | -1.28095 | 1.87392  |
| H  | 2.77987  | -0.37906 | 0.92218  |
| H  | 1.12753  | -1.08652 | 2.92481  |

|   |          |          |          |
|---|----------|----------|----------|
| C | 1.25172  | 2.49574  | 2.14407  |
| F | 1.03013  | 3.79402  | 2.36162  |
| F | 1.29293  | 1.89531  | 3.34306  |
| F | 2.46127  | 2.37936  | 1.59892  |
| C | 0.92578  | 2.62133  | -1.07861 |
| F | 1.05526  | 3.90582  | -0.72339 |
| F | 2.14847  | 2.09009  | -1.09394 |
| F | 0.46110  | 2.59170  | -2.32217 |
| C | -1.99166 | 1.19471  | -1.71265 |
| F | -2.28521 | 2.41260  | -2.18015 |
| F | -1.31882 | 0.54452  | -2.65535 |
| F | -3.15209 | 0.55655  | -1.53080 |
| C | 1.99166  | -1.19471 | -1.71265 |
| F | 2.28521  | -2.41260 | -2.18015 |
| F | 1.31882  | -0.54452 | -2.65535 |
| F | 3.15209  | -0.55655 | -1.53080 |
| C | -0.92578 | -2.62133 | -1.07861 |
| F | -0.46110 | -2.59170 | -2.32217 |
| F | -1.05526 | -3.90582 | -0.72339 |
| F | -2.14847 | -2.09009 | -1.09394 |
| C | -1.25172 | -2.49574 | 2.14407  |
| F | -2.46127 | -2.37936 | 1.59892  |
| F | -1.03013 | -3.79402 | 2.36162  |
| F | -1.29293 | -1.89531 | 3.34306  |

36

Energy: -2092508.9304774

|    |          |          |          |
|----|----------|----------|----------|
| Fe | 0.00000  | 0.00000  | 1.07389  |
| C  | 0.37668  | -1.15932 | -0.55259 |
| C  | -0.98617 | -0.71650 | -0.55259 |
| C  | 1.21898  | 0.00000  | -0.55259 |
| C  | -0.98617 | 0.71650  | -0.55259 |
| C  | 0.37668  | 1.15932  | -0.55259 |
| C  | 0.03611  | -1.20652 | 2.73354  |
| C  | 1.15862  | -0.33849 | 2.73354  |
| C  | -1.13631 | -0.40718 | 2.73354  |
| H  | 0.06896  | -2.28445 | 2.69298  |
| C  | 0.67996  | 0.99732  | 2.73354  |
| H  | 2.19396  | -0.64035 | 2.69298  |
| C  | -0.73838 | 0.95487  | 2.73354  |
| H  | -2.15133 | -0.77152 | 2.69298  |
| H  | 1.28698  | 1.88870  | 2.69298  |
| H  | -1.39856 | 1.80763  | 2.69298  |
| C  | 0.82574  | 2.60652  | -0.62216 |
| F  | 0.40397  | 3.16650  | -1.75856 |
| F  | 0.36157  | 3.33299  | 0.39908  |
| F  | 2.14831  | 2.73143  | -0.59939 |
| C  | -2.22378 | 1.59078  | -0.62216 |
| F  | -3.05813 | 1.37382  | 0.39908  |
| F  | -1.93388 | 2.88722  | -0.59939 |
| F  | -2.88668 | 1.36270  | -1.75856 |
| C  | 2.73412  | 0.02013  | -0.62216 |
| F  | 3.13635  | 0.59430  | -1.75856 |
| F  | 3.28159  | 0.68608  | 0.39908  |
| F  | 3.26161  | -1.19911 | -0.59939 |
| C  | -2.20011 | -1.62336 | -0.62216 |
| F  | -3.34351 | -0.94703 | -0.59939 |

|   |          |          |          |
|---|----------|----------|----------|
| F | -2.18804 | -2.32430 | -1.75856 |
| F | -2.25159 | -2.48392 | 0.39908  |
| C | 0.86403  | -2.59408 | -0.62216 |
| F | 1.53440  | -2.79920 | -1.75856 |
| F | 1.66657  | -2.90897 | 0.39908  |
| F | -0.13253 | -3.47252 | -0.59939 |

36

Energy: -2092509.4861370

|    |          |          |          |
|----|----------|----------|----------|
| Fe | 0.01604  | 0.01417  | 1.07492  |
| C  | 1.15005  | 0.41210  | -0.54383 |
| C  | 0.73647  | -0.95842 | -0.57988 |
| C  | -0.02766 | 1.22979  | -0.56122 |
| C  | -0.69113 | -0.98797 | -0.53243 |
| C  | -1.16648 | 0.36155  | -0.54902 |
| C  | 1.24007  | 0.09427  | 2.72024  |
| C  | 0.33151  | 1.18375  | 2.73240  |
| C  | 0.48410  | -1.10703 | 2.72939  |
| H  | 2.31560  | 0.16588  | 2.66908  |
| C  | -0.98554 | 0.65580  | 2.74774  |
| H  | 0.59480  | 2.22962  | 2.68984  |
| C  | -0.89126 | -0.76018 | 2.74645  |
| H  | 0.88545  | -2.10761 | 2.67996  |
| H  | -1.89901 | 1.22919  | 2.71870  |
| H  | -1.72057 | -1.45030 | 2.71758  |
| C  | -2.62918 | 0.75059  | -0.65429 |
| F  | -3.22316 | 0.01886  | -1.60170 |
| F  | -3.29984 | 0.56547  | 0.48638  |
| F  | -2.79277 | 2.02457  | -0.99216 |
| C  | -1.54342 | -2.23385 | -0.45142 |
| F  | -0.97810 | -3.16348 | 0.32557  |
| F  | -2.73916 | -1.98047 | 0.08159  |
| F  | -1.74770 | -2.76817 | -1.65458 |
| C  | -0.09150 | 2.73456  | -0.71158 |
| F  | -0.59769 | 3.05402  | -1.90581 |
| F  | -0.85177 | 3.30192  | 0.22957  |
| F  | 1.10426  | 3.30927  | -0.64446 |
| C  | 1.64240  | -2.14798 | -0.83725 |
| F  | 0.95830  | -3.18051 | -1.32598 |
| F  | 2.55309  | -1.83733 | -1.76332 |
| F  | 2.28490  | -2.57334 | 0.25175  |
| C  | 2.58569  | 0.88747  | -0.46157 |
| F  | 3.00237  | 1.37180  | -1.63189 |
| F  | 2.75873  | 1.83743  | 0.46102  |
| F  | 3.40653  | -0.10470 | -0.11434 |

36

Energy: -2092487.5042607

|    |          |          |          |
|----|----------|----------|----------|
| Fe | 0.00000  | 0.00000  | 1.18822  |
| C  | 0.72159  | -0.99319 | -0.43110 |
| C  | -0.72159 | -0.99319 | -0.43110 |
| C  | 1.16756  | 0.37936  | -0.43110 |
| C  | -1.16756 | 0.37936  | -0.43110 |
| C  | 0.00000  | 1.22765  | -0.43110 |
| C  | 0.70992  | -0.97712 | 2.84361  |
| C  | 1.14867  | 0.37323  | 2.84361  |

|   |          |          |          |
|---|----------|----------|----------|
| C | -0.70992 | -0.97712 | 2.84361  |
| H | 1.34414  | -1.85005 | 2.81039  |
| C | 0.00000  | 1.20779  | 2.84361  |
| H | 2.17487  | 0.70666  | 2.81039  |
| C | -1.14867 | 0.37323  | 2.84361  |
| H | -1.34414 | -1.85005 | 2.81039  |
| H | 0.00000  | 2.28679  | 2.81039  |
| H | -2.17487 | 0.70666  | 2.81039  |
| C | 0.00000  | 2.74797  | -0.63346 |
| F | 0.00000  | 2.97839  | -1.95464 |
| F | -1.04562 | 3.37604  | -0.11509 |
| F | 1.04562  | 3.37604  | -0.11509 |
| C | -2.61347 | 0.84917  | -0.63346 |
| F | -3.53392 | 0.04881  | -0.11509 |
| F | -2.88769 | 2.03770  | -0.11509 |
| F | -2.83262 | 0.92037  | -1.95464 |
| C | 2.61347  | 0.84917  | -0.63346 |
| F | 2.83262  | 0.92037  | -1.95464 |
| F | 2.88769  | 2.03770  | -0.11509 |
| F | 3.53392  | 0.04881  | -0.11509 |
| C | -1.61521 | -2.22315 | -0.63346 |
| F | -2.83031 | -2.11667 | -0.11509 |
| F | -1.75065 | -2.40957 | -1.95464 |
| F | -1.13846 | -3.34587 | -0.11509 |
| C | 1.61521  | -2.22315 | -0.63346 |
| F | 1.75065  | -2.40957 | -1.95464 |
| F | 2.83031  | -2.11667 | -0.11509 |
| F | 1.13846  | -3.34587 | -0.11509 |

51

Energy: -3149386.9508965

|    |          |          |          |
|----|----------|----------|----------|
| Fe | 0.00000  | 0.00000  | 0.00000  |
| C  | -0.71947 | -0.99027 | 1.67257  |
| C  | 0.71947  | -0.99027 | 1.67257  |
| C  | -1.16413 | 0.37825  | 1.67257  |
| C  | 1.16413  | 0.37825  | 1.67257  |
| C  | 0.00000  | 1.22404  | 1.67257  |
| C  | -0.71947 | -0.99027 | -1.67257 |
| C  | -1.16413 | 0.37825  | -1.67257 |
| C  | 0.71947  | -0.99027 | -1.67257 |
| C  | 0.00000  | 1.22404  | -1.67257 |
| C  | 1.16413  | 0.37825  | -1.67257 |
| C  | 0.00000  | 2.74104  | 1.94803  |
| F  | 0.00000  | 2.87755  | 3.28130  |
| F  | 1.04733  | 3.38588  | 1.46952  |
| F  | -1.04733 | 3.38588  | 1.46952  |
| C  | 2.60688  | 0.84703  | 1.94803  |
| F  | 3.54381  | 0.05022  | 1.46952  |
| F  | 2.89652  | 2.04237  | 1.46952  |
| F  | 2.73671  | 0.88921  | 3.28130  |
| C  | -2.60688 | 0.84703  | 1.94803  |
| F  | -2.73671 | 0.88921  | 3.28130  |
| F  | -2.89652 | 2.04237  | 1.46952  |
| F  | -3.54381 | 0.05022  | 1.46952  |
| C  | 1.61114  | -2.21754 | 1.94803  |
| F  | 2.83748  | -2.12363 | 1.46952  |
| F  | 1.69138  | -2.32798 | 3.28130  |

|   |          |          |          |
|---|----------|----------|----------|
| F | 1.14286  | -3.35484 | 1.46952  |
| C | -1.61114 | -2.21754 | 1.94803  |
| F | -1.69138 | -2.32798 | 3.28130  |
| F | -2.83748 | -2.12363 | 1.46952  |
| F | -1.14286 | -3.35484 | 1.46952  |
| C | 0.00000  | 2.74104  | -1.94803 |
| F | -1.04733 | 3.38588  | -1.46952 |
| F | 1.04733  | 3.38588  | -1.46952 |
| F | 0.00000  | 2.87755  | -3.28130 |
| C | -2.60688 | 0.84703  | -1.94803 |
| F | -2.89652 | 2.04237  | -1.46952 |
| F | -2.73671 | 0.88921  | -3.28130 |
| F | -3.54381 | 0.05022  | -1.46952 |
| C | -1.61114 | -2.21754 | -1.94803 |
| F | -2.83748 | -2.12363 | -1.46952 |
| F | -1.69138 | -2.32798 | -3.28130 |
| F | -1.14286 | -3.35484 | -1.46952 |
| C | 1.61114  | -2.21754 | -1.94803 |
| F | 1.14286  | -3.35484 | -1.46952 |
| F | 1.69138  | -2.32798 | -3.28130 |
| F | 2.83748  | -2.12363 | -1.46952 |
| C | 2.60688  | 0.84703  | -1.94803 |
| F | 3.54381  | 0.05022  | -1.46952 |
| F | 2.73671  | 0.88921  | -3.28130 |
| F | 2.89652  | 2.04237  | -1.46952 |

51

Energy: -3149424.2420272

|    |          |          |          |
|----|----------|----------|----------|
| Fe | 0.00000  | 0.00000  | 0.00000  |
| C  | -1.11171 | -0.49063 | 1.69835  |
| C  | 0.12308  | -1.20891 | 1.69835  |
| C  | -0.81016 | 0.90568  | 1.69835  |
| C  | 1.18778  | -0.25651 | 1.69835  |
| C  | 0.61100  | 1.05038  | 1.69835  |
| C  | -1.18778 | -0.25651 | -1.69835 |
| C  | -0.61100 | 1.05038  | -1.69835 |
| C  | -0.12308 | -1.20891 | -1.69835 |
| C  | 0.81016  | 0.90568  | -1.69835 |
| C  | 1.11171  | -0.49063 | -1.69835 |
| C  | 1.34815  | 2.37025  | 1.90642  |
| F  | 1.01347  | 2.85709  | 3.10450  |
| F  | 2.66424  | 2.22793  | 1.89980  |
| F  | 1.04837  | 3.27288  | 0.98079  |
| C  | 2.67085  | -0.54972 | 1.90642  |
| F  | 2.94219  | -1.84538 | 1.89980  |
| F  | 3.43666  | 0.01431  | 0.98079  |
| F  | 3.03043  | -0.08098 | 3.10450  |
| C  | -1.83764 | 2.01462  | 1.90642  |
| F  | -2.40407 | 1.84676  | 3.10450  |
| F  | -1.29560 | 3.22232  | 1.89980  |
| F  | -2.78873 | 2.00843  | 0.98079  |
| C  | 0.30252  | -2.71000 | 1.90642  |
| F  | 1.07560  | -3.26403 | 0.98079  |
| F  | 0.85944  | -2.90714 | 3.10450  |
| F  | -0.84587 | -3.36844 | 1.89980  |
| C  | -2.48388 | -1.12515 | 1.90642  |
| F  | -2.49927 | -1.71573 | 3.10450  |

|   |          |          |          |
|---|----------|----------|----------|
| F | -3.46496 | -0.23643 | 1.89980  |
| F | -2.77190 | -2.03160 | 0.98079  |
| C | 1.83764  | 2.01462  | -1.90642 |
| F | 1.29560  | 3.22232  | -1.89980 |
| F | 2.78873  | 2.00843  | -0.98079 |
| F | 2.40407  | 1.84676  | -3.10450 |
| C | -1.34815 | 2.37025  | -1.90642 |
| F | -1.04837 | 3.27288  | -0.98079 |
| F | -1.01347 | 2.85709  | -3.10450 |
| F | -2.66424 | 2.22793  | -1.89980 |
| C | -2.67085 | -0.54972 | -1.90642 |
| F | -3.43666 | 0.01431  | -0.98079 |
| F | -3.03043 | -0.08098 | -3.10450 |
| F | -2.94219 | -1.84538 | -1.89980 |
| C | -0.30252 | -2.71000 | -1.90642 |
| F | -1.07560 | -3.26403 | -0.98079 |
| F | -0.85944 | -2.90714 | -3.10450 |
| F | 0.84587  | -3.36844 | -1.89980 |
| C | 2.48388  | -1.12515 | -1.90642 |
| F | 2.77190  | -2.03160 | -0.98079 |
| F | 2.49927  | -1.71573 | -3.10450 |
| F | 3.46496  | -0.23643 | -1.89980 |

36

Energy: -2092486.6956708

|    |          |          |          |
|----|----------|----------|----------|
| Fe | 0.00000  | 0.00000  | 1.18748  |
| C  | 0.00000  | 1.22725  | -0.43557 |
| C  | 1.16719  | 0.37924  | -0.43557 |
| C  | -1.16719 | 0.37924  | -0.43557 |
| C  | 0.72136  | -0.99287 | -0.43557 |
| C  | -0.72136 | -0.99287 | -0.43557 |
| C  | 1.14823  | -0.37308 | 2.84818  |
| C  | 0.70964  | 0.97674  | 2.84818  |
| C  | 0.00000  | -1.20732 | 2.84818  |
| H  | 2.17428  | -0.70647 | 2.80792  |
| C  | -0.70964 | 0.97674  | 2.84818  |
| H  | 1.34378  | 1.84955  | 2.80792  |
| C  | -1.14823 | -0.37308 | 2.84818  |
| H  | 0.00000  | -2.28617 | 2.80792  |
| H  | -1.34378 | 1.84955  | 2.80792  |
| H  | -2.17428 | -0.70647 | 2.80792  |
| C  | 0.00000  | 2.74829  | -0.63419 |
| F  | 0.00000  | 2.98173  | -1.95483 |
| F  | -1.04558 | 3.37530  | -0.11444 |
| F  | 1.04558  | 3.37530  | -0.11444 |
| C  | 2.61378  | 0.84927  | -0.63419 |
| F  | 2.83580  | 0.92141  | -1.95483 |
| F  | 2.88700  | 2.03743  | -0.11444 |
| F  | 3.53321  | 0.04862  | -0.11444 |
| C  | 1.61540  | -2.22341 | -0.63419 |
| F  | 1.75262  | -2.41227 | -1.95483 |
| F  | 2.82985  | -2.11610 | -0.11444 |
| F  | 1.13807  | -3.34525 | -0.11444 |
| C  | -2.61378 | 0.84927  | -0.63419 |
| F  | -2.88700 | 2.03743  | -0.11444 |
| F  | -2.83580 | 0.92141  | -1.95483 |
| F  | -3.53321 | 0.04862  | -0.11444 |



|   |          |          |          |
|---|----------|----------|----------|
| C | -1.61540 | -2.22341 | -0.63419 |
| F | -1.13807 | -3.34525 | -0.11444 |
| F | -2.82985 | -2.11610 | -0.11444 |
| F | -1.75262 | -2.41227 | -1.95483 |

51

Energy: -3149423.9103132

|    |          |          |          |
|----|----------|----------|----------|
| Fe | 0.00000  | 0.00000  | 0.00000  |
| C  | -0.00367 | 1.21621  | 1.69980  |
| C  | -1.15689 | 0.37351  | 1.70063  |
| C  | 1.15419  | 0.37986  | 1.70031  |
| C  | -0.71179 | -0.98374 | 1.70123  |
| C  | 0.71660  | -0.97980 | 1.70104  |
| C  | -1.15419 | -0.37986 | -1.70031 |
| C  | -0.71660 | 0.97980  | -1.70104 |
| C  | 0.00367  | -1.21621 | -1.69980 |
| C  | 0.71179  | 0.98374  | -1.70123 |
| C  | 1.15689  | -0.37351 | -1.70063 |
| C  | 0.01587  | 2.72872  | 1.90298  |
| F  | 0.54653  | 2.98743  | 3.10132  |
| F  | 0.72669  | 3.36010  | 0.97714  |
| F  | -1.19614 | 3.26108  | 1.89261  |
| C  | -2.58884 | 0.85991  | 1.90601  |
| F  | -2.66781 | 1.44748  | 3.10314  |
| F  | -2.97202 | 1.72876  | 0.97905  |
| F  | -3.46971 | -0.12828 | 1.90043  |
| C  | -1.61677 | -2.19513 | 1.90745  |
| F  | -2.19742 | -2.08963 | 3.10592  |
| F  | -2.56353 | -2.28963 | 0.98240  |
| F  | -0.94955 | -3.33846 | 1.89934  |
| C  | 2.59819  | 0.82848  | 1.90588  |
| F  | 2.72968  | 2.14575  | 1.89912  |
| F  | 3.00717  | 0.40073  | 3.10353  |
| F  | 3.41913  | 0.35000  | 0.97973  |
| C  | 1.58944  | -2.21491 | 1.90498  |
| F  | 1.38520  | -3.14358 | 0.97927  |
| F  | 2.88301  | -1.93363 | 1.89481  |
| F  | 1.31172  | -2.73575 | 3.10334  |
| C  | -0.01587 | -2.72872 | -1.90298 |
| F  | -0.54653 | -2.98743 | -3.10132 |
| F  | 1.19614  | -3.26108 | -1.89261 |
| F  | -0.72669 | -3.36010 | -0.97714 |
| C  | -2.59819 | -0.82848 | -1.90588 |
| F  | -3.00717 | -0.40073 | -3.10353 |
| F  | -2.72968 | -2.14575 | -1.89912 |
| F  | -3.41913 | -0.35000 | -0.97973 |
| C  | 2.58884  | -0.85991 | -1.90601 |
| F  | 2.97202  | -1.72876 | -0.97905 |
| F  | 2.66781  | -1.44748 | -3.10314 |
| F  | 3.46971  | 0.12828  | -1.90043 |
| C  | 1.61677  | 2.19513  | -1.90745 |
| F  | 2.56353  | 2.28963  | -0.98240 |
| F  | 2.19742  | 2.08963  | -3.10592 |
| F  | 0.94955  | 3.33846  | -1.89934 |
| C  | -1.58944 | 2.21491  | -1.90498 |
| F  | -1.31172 | 2.73575  | -3.10334 |
| F  | -2.88301 | 1.93363  | -1.89481 |

|   |          |         |          |
|---|----------|---------|----------|
| F | -1.38520 | 3.14358 | -0.97927 |
|---|----------|---------|----------|

33

Energy: -1881143.4064973

|    |          |          |          |
|----|----------|----------|----------|
| Fe | 0.00000  | 0.00000  | 0.40707  |
| C  | 0.73096  | 1.46838  | 1.63602  |
| C  | 1.74489  | 1.02244  | 0.75862  |
| C  | -0.34658 | 1.95374  | 0.84318  |
| H  | 0.74887  | 1.41648  | 2.71343  |
| C  | 1.29272  | 1.23508  | -0.57294 |
| H  | 2.67982  | 0.56355  | 1.04110  |
| C  | 0.00000  | 1.81990  | -0.52669 |
| C  | 0.34658  | -1.95374 | 0.84318  |
| C  | -0.73096 | -1.46838 | 1.63602  |
| C  | 0.00000  | -1.81990 | -0.52669 |
| C  | -1.74489 | -1.02244 | 0.75862  |
| H  | -0.74887 | -1.41648 | 2.71343  |
| C  | -1.29272 | -1.23508 | -0.57294 |
| H  | 0.61630  | -2.08115 | -1.37285 |
| H  | -2.67982 | -0.56355 | 1.04110  |
| C  | 2.08434  | 0.97087  | -1.80809 |
| F  | 2.88314  | -0.09323 | -1.67013 |
| F  | 1.29989  | 0.76045  | -2.86803 |
| F  | 2.87225  | 2.01573  | -2.10135 |
| H  | -0.61630 | 2.08115  | -1.37285 |
| C  | -1.60029 | 2.56041  | 1.37148  |
| F  | -2.62447 | 2.41115  | 0.52689  |
| F  | -1.95592 | 2.01796  | 2.54473  |
| F  | -1.44971 | 3.87521  | 1.58087  |
| C  | -2.08434 | -0.97087 | -1.80809 |
| F  | -2.88314 | 0.09323  | -1.67013 |
| F  | -1.29989 | -0.76045 | -2.86803 |
| F  | -2.87225 | -2.01573 | -2.10135 |
| C  | 1.60029  | -2.56041 | 1.37148  |
| F  | 2.62447  | -2.41115 | 0.52689  |
| F  | 1.95592  | -2.01796 | 2.54473  |
| F  | 1.44971  | -3.87521 | 1.58087  |

33

Energy: -1881143.4064973

|    |          |          |          |
|----|----------|----------|----------|
| Fe | 0.00000  | 0.00000  | 0.40707  |
| C  | 1.74490  | -1.02242 | 0.75860  |
| C  | 0.73098  | -1.46837 | 1.63602  |
| C  | 1.29272  | -1.23507 | -0.57295 |
| H  | 2.67983  | -0.56353 | 1.04107  |
| C  | -0.34656 | -1.95374 | 0.84319  |
| H  | 0.74892  | -1.41647 | 2.71342  |
| C  | 0.00000  | -1.81990 | -0.52668 |
| C  | 0.34656  | 1.95374  | 0.84319  |
| C  | 0.00000  | 1.81990  | -0.52668 |
| C  | -0.73098 | 1.46837  | 1.63602  |
| C  | -1.29272 | 1.23507  | -0.57295 |
| H  | 0.61631  | 2.08116  | -1.37283 |
| C  | -1.74490 | 1.02242  | 0.75860  |
| H  | -0.74892 | 1.41647  | 2.71342  |
| H  | -2.67983 | 0.56353  | 1.04107  |

|   |          |          |          |
|---|----------|----------|----------|
| C | -1.60026 | -2.56042 | 1.37151  |
| F | -1.95591 | -2.01793 | 2.54474  |
| F | -2.62444 | -2.41121 | 0.52691  |
| F | -1.44966 | -3.87520 | 1.58095  |
| H | -0.61631 | -2.08116 | -1.37283 |
| C | 2.08432  | -0.97086 | -1.80811 |
| F | 2.88307  | 0.09328  | -1.67019 |
| F | 2.87228  | -2.01569 | -2.10135 |
| F | 1.29985  | -0.76050 | -2.86805 |
| C | -2.08432 | 0.97086  | -1.80811 |
| F | -2.87228 | 2.01569  | -2.10135 |
| F | -1.29985 | 0.76050  | -2.86805 |
| F | -2.88307 | -0.09328 | -1.67019 |
| C | 1.60026  | 2.56042  | 1.37151  |
| F | 2.62444  | 2.41121  | 0.52691  |
| F | 1.44966  | 3.87520  | 1.58095  |
| F | 1.95591  | 2.01793  | 2.54474  |

27

Energy: -1458355.4999544

|    |          |          |          |
|----|----------|----------|----------|
| Fe | -0.75484 | -0.18116 | 0.00000  |
| C  | 0.55940  | -1.58512 | 0.70684  |
| C  | 0.55940  | -1.58512 | -0.70684 |
| C  | 0.91798  | -0.27776 | 1.14142  |
| H  | 0.30223  | -2.41361 | 1.34802  |
| C  | 0.91798  | -0.27776 | -1.14142 |
| H  | 0.30223  | -2.41361 | -1.34802 |
| C  | 1.15286  | 0.53394  | 0.00000  |
| C  | -2.61400 | -0.66519 | 0.71014  |
| C  | -2.24192 | 0.63271  | 1.14852  |
| C  | -2.61400 | -0.66519 | -0.71014 |
| H  | -2.82833 | -1.51063 | 1.34594  |
| C  | -2.01250 | 1.43525  | 0.00000  |
| H  | -2.11764 | 0.94366  | 2.17468  |
| C  | -2.24192 | 0.63271  | -1.14852 |
| H  | -2.82833 | -1.51063 | -1.34594 |
| H  | -1.68718 | 2.46429  | 0.00000  |
| H  | -2.11764 | 0.94366  | -2.17468 |
| C  | 1.08260  | 0.15094  | -2.55524 |
| F  | 0.26611  | -0.51842 | -3.38050 |
| F  | 0.83813  | 1.45822  | -2.71545 |
| F  | 2.33352  | -0.06486 | -2.99162 |
| H  | 1.42982  | 1.57620  | 0.00000  |
| C  | 1.08260  | 0.15094  | 2.55524  |
| F  | 0.83813  | 1.45822  | 2.71545  |
| F  | 0.26611  | -0.51842 | 3.38050  |
| F  | 2.33352  | -0.06486 | 2.99162  |

33

Energy: -1881137.3375395

|    |          |         |         |
|----|----------|---------|---------|
| Fe | 0.00000  | 0.00000 | 0.49096 |
| C  | -0.70664 | 1.62840 | 1.52756 |
| C  | 0.70664  | 1.62840 | 1.52756 |
| C  | -1.13960 | 1.68548 | 0.17534 |
| H  | -1.35091 | 1.57475 | 2.39132 |
| C  | 1.13960  | 1.68548 | 0.17534 |

|   |          |          |          |
|---|----------|----------|----------|
| H | 1.35091  | 1.57475  | 2.39132  |
| C | 0.00000  | 1.71468  | -0.66636 |
| C | -0.70664 | -1.62840 | 1.52756  |
| C | -1.13960 | -1.68548 | 0.17534  |
| C | 0.70664  | -1.62840 | 1.52756  |
| H | -1.35091 | -1.57475 | 2.39132  |
| C | 0.00000  | -1.71468 | -0.66636 |
| C | 1.13960  | -1.68548 | 0.17534  |
| H | 1.35091  | -1.57475 | 2.39132  |
| H | 0.00000  | -1.76369 | -1.74400 |
| C | 2.54222  | 1.91856  | -0.27341 |
| F | 3.43597  | 1.40282  | 0.57272  |
| F | 2.77577  | 1.42185  | -1.48885 |
| F | 2.78454  | 3.23862  | -0.33815 |
| H | 0.00000  | 1.76369  | -1.74400 |
| C | -2.54222 | 1.91856  | -0.27341 |
| F | -2.78454 | 3.23862  | -0.33815 |
| F | -2.77577 | 1.42185  | -1.48885 |
| F | -3.43597 | 1.40282  | 0.57272  |
| C | 2.54222  | -1.91856 | -0.27341 |
| F | 2.77577  | -1.42185 | -1.48885 |
| F | 3.43597  | -1.40282 | 0.57272  |
| F | 2.78454  | -3.23862 | -0.33815 |
| C | -2.54222 | -1.91856 | -0.27341 |
| F | -3.43597 | -1.40282 | 0.57272  |
| F | -2.77577 | -1.42185 | -1.48885 |
| F | -2.78454 | -3.23862 | -0.33815 |

33

Energy: -1881143.4064785

|    |          |          |          |
|----|----------|----------|----------|
| Fe | 0.00000  | 0.00000  | 0.40709  |
| C  | 0.34668  | 1.95374  | 0.84311  |
| C  | 0.00000  | 1.81987  | -0.52673 |
| C  | -0.73082 | 1.46845  | 1.63605  |
| C  | -1.29275 | 1.23511  | -0.57286 |
| C  | -1.74483 | 1.02253  | 0.75874  |
| H  | -0.74866 | 1.41659  | 2.71346  |
| H  | -2.67977 | 0.56369  | 1.04129  |
| C  | 0.00000  | -1.81987 | -0.52673 |
| C  | 1.29275  | -1.23511 | -0.57286 |
| C  | -0.34668 | -1.95374 | 0.84311  |
| H  | -0.61624 | -2.08109 | -1.37295 |
| C  | 1.74483  | -1.02253 | 0.75874  |
| C  | 0.73082  | -1.46845 | 1.63605  |
| H  | 2.67977  | -0.56369 | 1.04129  |
| H  | 0.74866  | -1.41659 | 2.71346  |
| C  | 1.60044  | 2.56040  | 1.37132  |
| F  | 1.44996  | 3.87524  | 1.58051  |
| F  | 1.95602  | 2.01809  | 2.54465  |
| F  | 2.62461  | 2.41093  | 0.52675  |
| H  | 0.61624  | 2.08109  | -1.37295 |
| C  | -2.08448 | 0.97093  | -1.80794 |
| F  | -1.30014 | 0.76009  | -2.86788 |
| F  | -2.88360 | -0.09290 | -1.66977 |
| F  | -2.87209 | 2.01598  | -2.10136 |
| C  | 2.08448  | -0.97093 | -1.80794 |
| F  | 1.30014  | -0.76009 | -2.86788 |

|   |          |          |          |
|---|----------|----------|----------|
| F | 2.88360  | 0.09290  | -1.66977 |
| F | 2.87209  | -2.01598 | -2.10136 |
| C | -1.60044 | -2.56040 | 1.37132  |
| F | -2.62461 | -2.41093 | 0.52675  |
| F | -1.44996 | -3.87524 | 1.58051  |
| F | -1.95602 | -2.01809 | 2.54465  |

33

Energy: -1881140.3447092

|    |          |          |          |
|----|----------|----------|----------|
| Fe | 0.00000  | 0.00000  | 0.00000  |
| C  | 1.67220  | 0.31225  | 1.14012  |
| C  | 2.00114  | -0.46243 | 0.00000  |
| C  | 1.14511  | 1.56005  | 0.70624  |
| C  | 1.67220  | 0.31225  | -1.14012 |
| C  | 1.14511  | 1.56005  | -0.70624 |
| H  | 0.77814  | 2.34403  | 1.35017  |
| H  | 0.77814  | 2.34403  | -1.35017 |
| C  | -1.14511 | -1.56005 | -0.70624 |
| C  | -1.14511 | -1.56005 | 0.70624  |
| C  | -1.67220 | -0.31225 | -1.14012 |
| H  | -0.77814 | -2.34403 | -1.35017 |
| C  | -1.67220 | -0.31225 | 1.14012  |
| H  | -0.77814 | -2.34403 | 1.35017  |
| C  | -2.00114 | 0.46243  | 0.00000  |
| H  | -2.41593 | 1.45860  | 0.00000  |
| C  | 1.97335  | -0.07513 | 2.54775  |
| F  | 3.27654  | 0.10341  | 2.81366  |
| F  | 1.28985  | 0.65992  | 3.42507  |
| F  | 1.70561  | -1.36530 | 2.78489  |
| H  | 2.41593  | -1.45860 | 0.00000  |
| C  | 1.97335  | -0.07513 | -2.54775 |
| F  | 1.70561  | -1.36530 | -2.78489 |
| F  | 1.28985  | 0.65992  | -3.42507 |
| F  | 3.27654  | 0.10341  | -2.81366 |
| C  | -1.97335 | 0.07513  | 2.54775  |
| F  | -1.28985 | -0.65992 | 3.42507  |
| F  | -1.70561 | 1.36530  | 2.78489  |
| F  | -3.27654 | -0.10341 | 2.81366  |
| C  | -1.97335 | 0.07513  | -2.54775 |
| F  | -1.70561 | 1.36530  | -2.78489 |
| F  | -1.28985 | -0.65992 | -3.42507 |
| F  | -3.27654 | -0.10341 | -2.81366 |

27

Energy: -1458355.4999544

|    |          |          |          |
|----|----------|----------|----------|
| Fe | 0.75483  | -0.18118 | 0.00000  |
| C  | -0.91799 | -0.27776 | 1.14142  |
| C  | -1.15286 | 0.53394  | 0.00000  |
| C  | -0.55941 | -1.58512 | 0.70684  |
| C  | -0.91799 | -0.27776 | -1.14142 |
| C  | -0.55941 | -1.58512 | -0.70684 |
| H  | -0.30224 | -2.41361 | 1.34801  |
| H  | -0.30224 | -2.41361 | -1.34801 |
| C  | 2.24190  | 0.63271  | -1.14853 |
| C  | 2.01250  | 1.43524  | 0.00000  |
| C  | 2.61399  | -0.66519 | -0.71017 |

|   |          |          |          |
|---|----------|----------|----------|
| H | 2.11761  | 0.94368  | -2.17468 |
| C | 2.24190  | 0.63271  | 1.14853  |
| H | 1.68718  | 2.46429  | 0.00000  |
| C | 2.61399  | -0.66519 | 0.71017  |
| H | 2.82831  | -1.51063 | -1.34598 |
| H | 2.11761  | 0.94368  | 2.17468  |
| H | 2.82831  | -1.51063 | 1.34598  |
| C | -1.08258 | 0.15094  | 2.55525  |
| F | -2.33351 | -0.06485 | 2.99163  |
| F | -0.26610 | -0.51842 | 3.38050  |
| F | -0.83811 | 1.45822  | 2.71546  |
| H | -1.42981 | 1.57621  | 0.00000  |
| C | -1.08258 | 0.15094  | -2.55525 |
| F | -0.83811 | 1.45822  | -2.71546 |
| F | -0.26610 | -0.51842 | -3.38050 |
| F | -2.33351 | -0.06485 | -2.99163 |

33

Energy: -1881143.4064911

|    |          |          |          |
|----|----------|----------|----------|
| Fe | 0.00000  | 0.00000  | 0.40707  |
| C  | 0.34659  | 1.95374  | 0.84317  |
| C  | 0.00000  | 1.81989  | -0.52670 |
| C  | -0.73094 | 1.46839  | 1.63603  |
| C  | -1.29272 | 1.23508  | -0.57293 |
| C  | -1.74488 | 1.02245  | 0.75864  |
| H  | -0.74884 | 1.41650  | 2.71343  |
| H  | -2.67981 | 0.56358  | 1.04113  |
| C  | 1.29272  | -1.23508 | -0.57293 |
| C  | 1.74488  | -1.02245 | 0.75864  |
| C  | 0.00000  | -1.81989 | -0.52670 |
| C  | 0.73094  | -1.46839 | 1.63603  |
| H  | 2.67981  | -0.56358 | 1.04113  |
| C  | -0.34659 | -1.95374 | 0.84317  |
| H  | -0.61629 | -2.08114 | -1.37287 |
| H  | 0.74884  | -1.41650 | 2.71343  |
| C  | 1.60032  | 2.56041  | 1.37145  |
| F  | 1.44975  | 3.87521  | 1.58082  |
| F  | 1.95594  | 2.01797  | 2.54471  |
| F  | 2.62449  | 2.41113  | 0.52686  |
| H  | 0.61629  | 2.08114  | -1.37287 |
| C  | -2.08436 | 0.97088  | -1.80806 |
| F  | -1.29994 | 0.76038  | -2.86800 |
| F  | -2.88323 | -0.09316 | -1.67006 |
| F  | -2.87222 | 2.01578  | -2.10136 |
| C  | 2.08436  | -0.97088 | -1.80806 |
| F  | 2.87222  | -2.01578 | -2.10136 |
| F  | 1.29994  | -0.76038 | -2.86800 |
| F  | 2.88323  | 0.09316  | -1.67006 |
| C  | -1.60032 | -2.56041 | 1.37145  |
| F  | -2.62449 | -2.41113 | 0.52686  |
| F  | -1.44975 | -3.87521 | 1.58082  |
| F  | -1.95594 | -2.01797 | 2.54471  |

39

Energy: -2303919.2758022

|    |         |         |         |
|----|---------|---------|---------|
| Fe | 0.00000 | 0.00000 | 0.27210 |
|----|---------|---------|---------|

|   |          |          |          |
|---|----------|----------|----------|
| C | 0.36021  | 1.72476  | 1.31794  |
| C | 1.52227  | 0.91405  | 1.27908  |
| C | 0.00000  | 2.02711  | -0.01943 |
| H | -0.17945 | 2.02997  | 2.20072  |
| C | 1.89861  | 0.72585  | -0.07370 |
| C | 0.96067  | 1.41107  | -0.88208 |
| C | -1.52227 | -0.91405 | 1.27908  |
| C | -1.89861 | -0.72585 | -0.07370 |
| C | -0.36021 | -1.72476 | 1.31794  |
| C | -0.96067 | -1.41107 | -0.88208 |
| H | -2.73147 | -0.14272 | -0.43386 |
| C | 0.00000  | -2.02711 | -0.01943 |
| H | 0.17945  | -2.02997 | 2.20072  |
| C | 1.13065  | 1.59423  | -2.36024 |
| F | 1.71954  | 2.77247  | -2.60372 |
| F | 1.91767  | 0.64573  | -2.86894 |
| F | -0.02191 | 1.58149  | -3.02372 |
| C | -1.13804 | 2.93194  | -0.39481 |
| F | -0.68531 | 4.02086  | -1.02190 |
| F | -2.03109 | 2.35218  | -1.19960 |
| F | -1.78909 | 3.33548  | 0.69948  |
| H | 2.73147  | 0.14272  | -0.43386 |
| C | 2.28150  | 0.41196  | 2.46278  |
| F | 2.90457  | -0.73920 | 2.19429  |
| F | 3.21723  | 1.29419  | 2.83129  |
| F | 1.48603  | 0.21349  | 3.51709  |
| C | -1.13065 | -1.59423 | -2.36024 |
| F | -1.71954 | -2.77247 | -2.60372 |
| F | -1.91767 | -0.64573 | -2.86894 |
| F | 0.02191  | -1.58149 | -3.02372 |
| C | 1.13804  | -2.93194 | -0.39481 |
| F | 0.68531  | -4.02086 | -1.02190 |
| F | 2.03109  | -2.35218 | -1.19960 |
| F | 1.78909  | -3.33548 | 0.69948  |
| C | -2.28150 | -0.41196 | 2.46278  |
| F | -1.48603 | -0.21349 | 3.51709  |
| F | -2.90457 | 0.73920  | 2.19429  |
| F | -3.21723 | -1.29419 | 2.83129  |

39

Energy: -2303916.1797646

|    |          |          |          |
|----|----------|----------|----------|
| Fe | 0.00000  | 0.00000  | 0.12008  |
| C  | 1.26605  | 1.24624  | -0.92719 |
| C  | 1.08965  | 1.73653  | 0.38810  |
| C  | 1.80889  | -0.05938 | -0.83459 |
| H  | 1.00974  | 1.76157  | -1.83916 |
| C  | 1.52411  | 0.74675  | 1.30238  |
| C  | 1.97785  | -0.36485 | 0.55281  |
| C  | -1.80889 | 0.05938  | -0.83459 |
| C  | -1.26605 | -1.24624 | -0.92719 |
| C  | -1.97785 | 0.36485  | 0.55281  |
| C  | -1.08965 | -1.73653 | 0.38810  |
| H  | -1.00974 | -1.76157 | -1.83916 |
| C  | -1.52411 | -0.74675 | 1.30238  |
| H  | -1.51764 | -0.82050 | 2.37869  |
| C  | 2.71895  | -1.50823 | 1.17667  |
| F  | 4.03144  | -1.23906 | 1.17918  |

|   |          |          |          |
|---|----------|----------|----------|
| F | 2.34903  | -1.67652 | 2.44884  |
| F | 2.55230  | -2.65982 | 0.53629  |
| C | 2.22268  | -0.87093 | -2.02764 |
| F | 3.54916  | -1.02615 | -2.05118 |
| F | 1.67814  | -2.08766 | -2.05925 |
| F | 1.86726  | -0.24640 | -3.15523 |
| H | 1.51764  | 0.82050  | 2.37869  |
| C | 0.72605  | 3.14027  | 0.75086  |
| F | 0.05971  | 3.20384  | 1.90433  |
| F | 1.84519  | 3.86456  | 0.90343  |
| F | 0.00000  | 3.73175  | -0.19406 |
| C | -2.22268 | 0.87093  | -2.02764 |
| F | -3.54916 | 1.02615  | -2.05118 |
| F | -1.67814 | 2.08766  | -2.05925 |
| F | -1.86726 | 0.24640  | -3.15523 |
| C | -2.71895 | 1.50823  | 1.17667  |
| F | -2.55230 | 2.65982  | 0.53629  |
| F | -4.03144 | 1.23906  | 1.17918  |
| F | -2.34903 | 1.67652  | 2.44884  |
| C | -0.72605 | -3.14027 | 0.75086  |
| F | 0.00000  | -3.73175 | -0.19406 |
| F | -0.05971 | -3.20384 | 1.90433  |
| F | -1.84519 | -3.86456 | 0.90343  |

30

Energy: -1669746.3088512

|    |          |          |          |
|----|----------|----------|----------|
| Fe | -0.41686 | 0.81342  | -0.02003 |
| C  | -0.55762 | -0.84135 | 1.16846  |
| C  | -1.37367 | -0.98130 | 0.01782  |
| C  | 0.77702  | -0.64389 | 0.72930  |
| H  | -0.88895 | -0.84956 | 2.19455  |
| C  | -0.55388 | -0.89583 | -1.13571 |
| C  | 0.78009  | -0.67883 | -0.70384 |
| C  | -0.99697 | 2.41650  | 1.11466  |
| C  | 0.31853  | 2.61658  | 0.61846  |
| C  | -1.86547 | 2.26039  | 0.00274  |
| H  | -1.28096 | 2.35861  | 2.15431  |
| C  | 0.26198  | 2.58537  | -0.79889 |
| H  | 1.21151  | 2.73277  | 1.21352  |
| C  | -1.08756 | 2.36458  | -1.18023 |
| H  | -2.92471 | 2.05785  | 0.04930  |
| H  | 1.10527  | 2.67179  | -1.46643 |
| H  | -1.45335 | 2.26093  | -2.19036 |
| C  | 1.94869  | -0.61619 | -1.63734 |
| F  | 2.75977  | -1.66599 | -1.45793 |
| F  | 1.53103  | -0.64683 | -2.90960 |
| F  | 2.69571  | 0.48216  | -1.49717 |
| C  | 1.93542  | -0.53888 | 1.66614  |
| F  | 2.52712  | -1.72904 | 1.83298  |
| F  | 2.87548  | 0.31109  | 1.24906  |
| F  | 1.53081  | -0.12920 | 2.87629  |
| H  | -0.88160 | -0.95652 | -2.16094 |
| C  | -2.84018 | -1.23640 | 0.02070  |
| F  | -3.43599 | -0.73450 | -1.06810 |
| F  | -3.10578 | -2.55009 | 0.03962  |
| F  | -3.43674 | -0.70309 | 1.09409  |



39

Energy: -2303911.4531248

|    |          |          |          |
|----|----------|----------|----------|
| Fe | 0.00000  | 0.00000  | 0.35074  |
| C  | -1.14835 | 1.66963  | 0.75905  |
| C  | 0.00000  | 1.66392  | 1.58379  |
| C  | -0.71491 | 1.69525  | -0.58979 |
| H  | -2.17488 | 1.66144  | 1.09032  |
| C  | 1.14835  | 1.66963  | 0.75905  |
| C  | 0.71491  | 1.69525  | -0.58979 |
| C  | -1.14835 | -1.66963 | 0.75905  |
| C  | -0.71491 | -1.69525 | -0.58979 |
| C  | 0.00000  | -1.66392 | 1.58379  |
| H  | -2.17488 | -1.66144 | 1.09032  |
| C  | 0.71491  | -1.69525 | -0.58979 |
| C  | 1.14835  | -1.66963 | 0.75905  |
| H  | 2.17488  | -1.66144 | 1.09032  |
| C  | 1.67302  | 1.94588  | -1.71793 |
| F  | 1.75274  | 3.26549  | -1.94167 |
| F  | 2.89917  | 1.52596  | -1.38834 |
| F  | 1.33506  | 1.36968  | -2.86148 |
| C  | -1.67302 | 1.94588  | -1.71793 |
| F  | -1.75274 | 3.26549  | -1.94167 |
| F  | -1.33506 | 1.36968  | -2.86148 |
| F  | -2.89917 | 1.52596  | -1.38834 |
| H  | 2.17488  | 1.66144  | 1.09032  |
| C  | 0.00000  | 1.88951  | 3.06072  |
| F  | 1.08269  | 1.38358  | 3.64947  |
| F  | 0.00000  | 3.20873  | 3.30368  |
| F  | -1.08269 | 1.38358  | 3.64947  |
| C  | -1.67302 | -1.94588 | -1.71793 |
| F  | -2.89917 | -1.52596 | -1.38834 |
| F  | -1.33506 | -1.36968 | -2.86148 |
| F  | -1.75274 | -3.26549 | -1.94167 |
| C  | 1.67302  | -1.94588 | -1.71793 |
| F  | 1.75274  | -3.26549 | -1.94167 |
| F  | 1.33506  | -1.36968 | -2.86148 |
| F  | 2.89917  | -1.52596 | -1.38834 |
| C  | 0.00000  | -1.88951 | 3.06072  |
| F  | 1.08269  | -1.38358 | 3.64947  |
| F  | -1.08269 | -1.38358 | 3.64947  |
| F  | 0.00000  | -3.20873 | 3.30368  |

39

Energy: -2303916.1797646

|    |          |          |          |
|----|----------|----------|----------|
| Fe | 0.00000  | 0.00000  | 0.12008  |
| C  | 1.52411  | 0.74675  | 1.30238  |
| C  | 1.97785  | -0.36485 | 0.55281  |
| C  | 1.08965  | 1.73653  | 0.38810  |
| C  | 1.80889  | -0.05938 | -0.83459 |
| C  | 1.26605  | 1.24624  | -0.92719 |
| H  | 1.00974  | 1.76157  | -1.83916 |
| C  | -1.26605 | -1.24624 | -0.92719 |
| C  | -1.08965 | -1.73653 | 0.38810  |
| C  | -1.80889 | 0.05938  | -0.83459 |
| H  | -1.00974 | -1.76157 | -1.83916 |
| C  | -1.52411 | -0.74675 | 1.30238  |

|   |          |          |          |
|---|----------|----------|----------|
| C | -1.97785 | 0.36485  | 0.55281  |
| H | -1.51764 | -0.82050 | 2.37869  |
| C | 2.71895  | -1.50823 | 1.17667  |
| F | 4.03144  | -1.23906 | 1.17918  |
| F | 2.34903  | -1.67652 | 2.44884  |
| F | 2.55230  | -2.65982 | 0.53629  |
| C | 2.22268  | -0.87093 | -2.02764 |
| F | 3.54916  | -1.02615 | -2.05118 |
| F | 1.67814  | -2.08766 | -2.05925 |
| F | 1.86727  | -0.24639 | -3.15523 |
| H | 1.51764  | 0.82050  | 2.37869  |
| C | -2.22268 | 0.87093  | -2.02764 |
| F | -1.67814 | 2.08766  | -2.05925 |
| F | -1.86727 | 0.24639  | -3.15523 |
| F | -3.54916 | 1.02615  | -2.05118 |
| C | -2.71895 | 1.50823  | 1.17667  |
| F | -2.55230 | 2.65982  | 0.53629  |
| F | -4.03144 | 1.23906  | 1.17918  |
| F | -2.34903 | 1.67652  | 2.44884  |
| C | 0.72605  | 3.14027  | 0.75086  |
| F | 0.00000  | 3.73175  | -0.19406 |
| F | 0.05971  | 3.20384  | 1.90433  |
| F | 1.84519  | 3.86456  | 0.90343  |
| C | -0.72605 | -3.14027 | 0.75086  |
| F | 0.00000  | -3.73175 | -0.19406 |
| F | -0.05971 | -3.20384 | 1.90433  |
| F | -1.84519 | -3.86456 | 0.90343  |

39

Energy: -2303912.6241077

|    |          |          |          |
|----|----------|----------|----------|
| Fe | 0.00000  | 0.00000  | 0.00000  |
| C  | -1.70377 | 0.23182  | 1.14739  |
| C  | -1.22032 | 1.49161  | 0.71659  |
| C  | -2.00589 | -0.53650 | 0.00000  |
| C  | -1.22032 | 1.49161  | -0.71659 |
| C  | -1.70377 | 0.23182  | -1.14739 |
| H  | -1.80808 | -0.08465 | -2.17369 |
| C  | 2.00589  | 0.53650  | 0.00000  |
| C  | 1.70377  | -0.23182 | 1.14739  |
| C  | 1.70377  | -0.23182 | -1.14739 |
| C  | 1.22032  | -1.49161 | 0.71659  |
| H  | 1.80808  | 0.08465  | 2.17369  |
| C  | 1.22032  | -1.49161 | -0.71659 |
| H  | 1.80808  | 0.08465  | -2.17369 |
| C  | -0.98403 | 2.60267  | 1.69738  |
| F  | -2.13040 | 3.26442  | 1.90638  |
| F  | -0.59628 | 2.10220  | 2.87820  |
| F  | -0.07795 | 3.48971  | 1.31541  |
| C  | -0.98403 | 2.60267  | -1.69738 |
| F  | -2.13040 | 3.26442  | -1.90638 |
| F  | -0.07795 | 3.48971  | -1.31541 |
| F  | -0.59628 | 2.10220  | -2.87820 |
| H  | -1.80808 | -0.08465 | 2.17369  |
| C  | -2.75964 | -1.82719 | 0.00000  |
| F  | -2.50663 | -2.55987 | 1.08233  |
| F  | -4.07622 | -1.56570 | 0.00000  |
| F  | -2.50663 | -2.55987 | -1.08233 |

|   |         |          |          |
|---|---------|----------|----------|
| C | 0.98403 | -2.60267 | -1.69738 |
| F | 2.13040 | -3.26442 | -1.90638 |
| F | 0.07795 | -3.48971 | -1.31541 |
| F | 0.59628 | -2.10220 | -2.87820 |
| C | 0.98403 | -2.60267 | 1.69738  |
| F | 0.07795 | -3.48971 | 1.31541  |
| F | 2.13040 | -3.26442 | 1.90638  |
| F | 0.59628 | -2.10220 | 2.87820  |
| C | 2.75964 | 1.82719  | 0.00000  |
| F | 2.50663 | 2.55987  | 1.08233  |
| F | 4.07622 | 1.56570  | 0.00000  |
| F | 2.50663 | 2.55987  | -1.08233 |

30

Energy: -1669746.2920403

|    |          |          |          |
|----|----------|----------|----------|
| Fe | -0.81385 | 0.41425  | 0.00000  |
| C  | 0.86840  | 0.55647  | 1.15217  |
| C  | 0.66205  | -0.77834 | 0.71705  |
| C  | 0.98003  | 1.37453  | 0.00000  |
| C  | 0.66205  | -0.77834 | -0.71705 |
| C  | 0.86840  | 0.55647  | -1.15217 |
| H  | 0.90179  | 0.88590  | -2.17817 |
| C  | -2.59952 | -0.29972 | 0.70942  |
| C  | -2.39296 | 1.03470  | 1.14864  |
| C  | -2.59952 | -0.29972 | -0.70942 |
| H  | -2.69798 | -1.16912 | 1.34117  |
| C  | -2.26508 | 1.85901  | 0.00000  |
| H  | -2.31336 | 1.36021  | 2.17462  |
| C  | -2.39296 | 1.03470  | -1.14864 |
| H  | -2.69798 | -1.16912 | -1.34117 |
| H  | -2.06558 | 2.91985  | 0.00000  |
| H  | -2.31336 | 1.36021  | -2.17462 |
| C  | 0.57988  | -1.93877 | 1.65654  |
| F  | 1.71934  | -2.64250 | 1.64889  |
| F  | 0.38618  | -1.51283 | 2.91196  |
| F  | -0.40710 | -2.79083 | 1.37106  |
| C  | 0.57988  | -1.93877 | -1.65654 |
| F  | 1.71934  | -2.64250 | -1.64889 |
| F  | -0.40710 | -2.79083 | -1.37106 |
| F  | 0.38618  | -1.51283 | -2.91196 |
| H  | 0.90179  | 0.88590  | 2.17817  |
| C  | 1.23282  | 2.84146  | 0.00000  |
| F  | 0.71422  | 3.43680  | 1.08119  |
| F  | 2.54625  | 3.10909  | 0.00000  |
| F  | 0.71422  | 3.43680  | -1.08119 |

39

Energy: -2303919.2758022

|    |          |          |          |
|----|----------|----------|----------|
| Fe | 0.00000  | 0.00000  | 0.27213  |
| C  | -0.36022 | 1.72478  | 1.31794  |
| C  | 0.00000  | 2.02710  | -0.01945 |
| C  | -1.52227 | 0.91407  | 1.27909  |
| C  | -0.96067 | 1.41104  | -0.88208 |
| C  | -1.89861 | 0.72584  | -0.07369 |
| H  | -2.73146 | 0.14270  | -0.43384 |
| C  | 0.96067  | -1.41104 | -0.88208 |

|   |          |          |          |
|---|----------|----------|----------|
| C | 1.89861  | -0.72584 | -0.07369 |
| C | 0.00000  | -2.02710 | -0.01945 |
| C | 1.52227  | -0.91407 | 1.27909  |
| H | 2.73146  | -0.14270 | -0.43384 |
| C | 0.36022  | -1.72478 | 1.31794  |
| H | -0.17944 | -2.03001 | 2.20071  |
| C | 1.13803  | 2.93193  | -0.39483 |
| F | 0.68528  | 4.02091  | -1.02180 |
| F | 1.78916  | 3.33538  | 0.69946  |
| F | 2.03102  | 2.35222  | -1.19971 |
| C | -1.13068 | 1.59418  | -2.36025 |
| F | -1.71954 | 2.77243  | -2.60373 |
| F | 0.02187  | 1.58141  | -3.02375 |
| F | -1.91772 | 0.64570  | -2.86891 |
| H | 0.17944  | 2.03001  | 2.20071  |
| C | -2.28150 | 0.41198  | 2.46280  |
| F | -1.48603 | 0.21348  | 3.51709  |
| F | -3.21720 | 1.29424  | 2.83133  |
| F | -2.90461 | -0.73915 | 2.19429  |
| C | 1.13068  | -1.59418 | -2.36025 |
| F | 1.71954  | -2.77243 | -2.60373 |
| F | -0.02187 | -1.58141 | -3.02375 |
| F | 1.91772  | -0.64570 | -2.86891 |
| C | -1.13803 | -2.93193 | -0.39483 |
| F | -2.03102 | -2.35222 | -1.19971 |
| F | -0.68528 | -4.02091 | -1.02180 |
| F | -1.78916 | -3.33538 | 0.69946  |
| C | 2.28150  | -0.41198 | 2.46280  |
| F | 2.90461  | 0.73915  | 2.19429  |
| F | 1.48603  | -0.21348 | 3.51709  |
| F | 3.21720  | -1.29424 | 2.83133  |

45

Energy: -2726679.7581607

|    |          |          |          |
|----|----------|----------|----------|
| Fe | 0.00000  | 0.00000  | 0.26260  |
| C  | 1.08394  | 1.52047  | 1.14684  |
| C  | 1.67471  | 0.26949  | 1.42672  |
| C  | 1.06827  | 1.70712  | -0.25339 |
| H  | 0.68906  | 2.20814  | 1.87634  |
| C  | 2.03387  | -0.33728 | 0.18712  |
| C  | 1.66214  | 0.56052  | -0.86164 |
| C  | -1.67471 | -0.26949 | 1.42672  |
| C  | -2.03387 | 0.33728  | 0.18712  |
| C  | -1.08394 | -1.52047 | 1.14684  |
| C  | -1.66214 | -0.56052 | -0.86164 |
| C  | -1.06827 | -1.70712 | -0.25339 |
| H  | -0.68906 | -2.20814 | 1.87634  |
| C  | 2.03232  | 0.39254  | -2.32061 |
| F  | 3.33866  | 0.12716  | -2.41819 |
| F  | 1.36911  | -0.59375 | -2.91453 |
| F  | 1.80390  | 1.50643  | -3.00747 |
| C  | 2.85845  | -1.59367 | 0.05718  |
| F  | 2.57712  | -2.45795 | 1.03234  |
| F  | 2.67005  | -2.21290 | -1.10035 |
| F  | 4.15451  | -1.28639 | 0.15153  |
| C  | 0.66051  | 3.02725  | -0.86046 |
| F  | 1.75362  | 3.71787  | -1.19964 |

|   |          |          |          |
|---|----------|----------|----------|
| F | -0.11115 | 2.92602  | -1.93039 |
| F | 0.00000  | 3.75132  | 0.04954  |
| C | 1.97693  | -0.19919 | 2.82855  |
| F | 1.34032  | -1.31889 | 3.17306  |
| F | 3.28451  | -0.41557 | 2.97131  |
| F | 1.62361  | 0.74304  | 3.70478  |
| C | -0.66051 | -3.02725 | -0.86046 |
| F | 0.11115  | -2.92602 | -1.93039 |
| F | 0.00000  | -3.75132 | 0.04954  |
| F | -1.75362 | -3.71787 | -1.19964 |
| C | -2.03232 | -0.39254 | -2.32061 |
| F | -1.80390 | -1.50643 | -3.00747 |
| F | -3.33866 | -0.12716 | -2.41819 |
| F | -1.36911 | 0.59375  | -2.91453 |
| C | -2.85845 | 1.59367  | 0.05718  |
| F | -2.67005 | 2.21290  | -1.10035 |
| F | -4.15451 | 1.28639  | 0.15153  |
| F | -2.57712 | 2.45795  | 1.03234  |
| C | -1.97693 | 0.19919  | 2.82855  |
| F | -1.34032 | 1.31889  | 3.17306  |
| F | -3.28451 | 0.41557  | 2.97131  |
| F | -1.62361 | -0.74304 | 3.70478  |

45

|         |               |          |          |
|---------|---------------|----------|----------|
| Energy: | -1220.6449577 |          |          |
| Fe      | 0.00000       | 0.00000  | 0.09486  |
| C       | 0.13126       | 1.66593  | 1.29718  |
| C       | 1.31944       | 0.84703  | 1.42897  |
| C       | 0.00000       | 2.03772  | -0.07637 |
| H       | -0.42490      | 2.11192  | 2.12899  |
| C       | 1.92263       | 0.69691  | 0.12437  |
| C       | 1.07987       | 1.40281  | -0.81716 |
| C       | -1.92263      | -0.69691 | 0.12437  |
| C       | -1.07987      | -1.40281 | -0.81716 |
| C       | -1.31944      | -0.84703 | 1.42897  |
| C       | 0.00000       | -2.03772 | -0.07637 |
| C       | -0.13126      | -1.66593 | 1.29718  |
| H       | 0.42490       | -2.11192 | 2.12899  |
| C       | 1.38094       | 1.70934  | -2.25808 |
| F       | 1.73401       | 2.97483  | -2.46409 |
| F       | 2.36819       | 1.01285  | -2.79982 |
| F       | 0.34956       | 1.50456  | -3.06769 |
| C       | 3.30789       | 0.16941  | -0.13568 |
| F       | 3.65194       | -0.87760 | 0.60743  |
| F       | 3.56012       | -0.21712 | -1.37756 |
| F       | 4.24350       | 1.08523  | 0.12132  |
| C       | -0.95214      | 3.07911  | -0.58393 |
| F       | -1.59068      | 3.73250  | 0.39898  |
| F       | -0.37442      | 4.05442  | -1.29559 |
| F       | -1.92604      | 2.61501  | -1.37006 |
| C       | 1.97870       | 0.58767  | 2.75232  |
| F       | 2.37882       | -0.66928 | 2.97312  |
| F       | 3.07646       | 1.33345  | 2.93746  |
| F       | 1.20299       | 0.87452  | 3.80853  |
| C       | 0.95214       | -3.07911 | -0.58393 |
| F       | 1.59068       | -3.73250 | 0.39898  |
| F       | 0.37442       | -4.05442 | -1.29559 |

|   |          |          |          |
|---|----------|----------|----------|
| F | 1.92604  | -2.61501 | -1.37006 |
| C | -1.38094 | -1.70934 | -2.25808 |
| F | -0.34956 | -1.50456 | -3.06769 |
| F | -1.73401 | -2.97483 | -2.46409 |
| F | -2.36819 | -1.01285 | -2.79982 |
| C | -3.30789 | -0.16941 | -0.13568 |
| F | -3.56012 | 0.21712  | -1.37756 |
| F | -4.24350 | -1.08523 | 0.12132  |
| F | -3.65194 | 0.87760  | 0.60743  |
| C | -1.97870 | -0.58767 | 2.75232  |
| F | -2.37882 | 0.66928  | 2.97312  |
| F | -3.07646 | -1.33345 | 2.93746  |
| F | -1.20299 | -0.87452 | 3.80853  |

33

Energy: -1881131.1947677

|    |          |          |          |
|----|----------|----------|----------|
| Fe | 0.02860  | -0.75775 | 0.75693  |
| C  | 0.00511  | -1.22281 | -1.24180 |
| C  | -1.15000 | -0.48926 | -0.88886 |
| C  | 1.14520  | -0.45180 | -0.91413 |
| H  | 0.01608  | -2.21498 | -1.66150 |
| C  | -0.73099 | 0.76350  | -0.34008 |
| C  | 0.70135  | 0.79525  | -0.36961 |
| C  | -0.21379 | -2.50175 | 1.80988  |
| C  | 1.09962  | -1.99724 | 1.99412  |
| C  | -1.12920 | -1.51901 | 2.27035  |
| H  | -0.47282 | -3.45108 | 1.36613  |
| C  | 0.99632  | -0.70307 | 2.56589  |
| H  | 2.01605  | -2.49163 | 1.70991  |
| C  | -0.38138 | -0.40730 | 2.73624  |
| H  | -2.20499 | -1.58595 | 2.22955  |
| H  | 1.81858  | -0.04125 | 2.78896  |
| H  | -0.78842 | 0.51822  | 3.11402  |
| C  | 1.55785  | 1.98618  | -0.01963 |
| F  | 1.05958  | 3.09561  | -0.57343 |
| F  | 1.65080  | 2.20476  | 1.29558  |
| F  | 2.79882  | 1.84013  | -0.48282 |
| C  | -1.63743 | 1.88146  | 0.08639  |
| F  | -2.81736 | 1.41973  | 0.50739  |
| F  | -1.11547 | 2.59890  | 1.08384  |
| F  | -1.87702 | 2.71719  | -0.92799 |
| C  | 2.53972  | -0.94173 | -1.17130 |
| F  | 3.08265  | -0.34539 | -2.23527 |
| F  | 3.36512  | -0.75787 | -0.13835 |
| F  | 2.51964  | -2.25814 | -1.42696 |
| C  | -2.54025 | -0.97755 | -1.18402 |
| F  | -3.29244 | -1.18233 | -0.10046 |
| F  | -3.19281 | -0.11272 | -1.96528 |
| F  | -2.48162 | -2.14442 | -1.83934 |

45

Energy: -2726667.5611211

|    |          |         |         |
|----|----------|---------|---------|
| Fe | 0.00000  | 0.00000 | 0.40017 |
| C  | 0.00000  | 1.62788 | 1.67046 |
| C  | 1.14775  | 1.67522 | 0.85197 |
| C  | -1.14775 | 1.67522 | 0.85197 |

|   |          |          |          |
|---|----------|----------|----------|
| H | 0.00000  | 1.57750  | 2.74679  |
| C | 0.71672  | 1.73240  | -0.50847 |
| C | -0.71672 | 1.73240  | -0.50847 |
| C | 0.00000  | -1.62788 | 1.67046  |
| C | -1.14775 | -1.67522 | 0.85197  |
| C | 1.14775  | -1.67522 | 0.85197  |
| H | 0.00000  | -1.57750 | 2.74679  |
| C | -0.71672 | -1.73240 | -0.50847 |
| C | 0.71672  | -1.73240 | -0.50847 |
| C | -1.60450 | 2.04180  | -1.69511 |
| F | -1.51375 | 3.34980  | -1.96439 |
| F | -1.27366 | 1.37878  | -2.79263 |
| F | -2.87945 | 1.77367  | -1.43511 |
| C | 1.60450  | 2.04180  | -1.69511 |
| F | 2.87945  | 1.77367  | -1.43511 |
| F | 1.27366  | 1.37878  | -2.79263 |
| F | 1.51375  | 3.34980  | -1.96439 |
| C | -2.49803 | 1.94653  | 1.47544  |
| F | -2.75605 | 3.25508  | 1.36149  |
| F | -3.52118 | 1.28809  | 0.96678  |
| F | -2.44654 | 1.66046  | 2.78287  |
| C | 2.49803  | 1.94653  | 1.47544  |
| F | 3.52118  | 1.28809  | 0.96678  |
| F | 2.75605  | 3.25508  | 1.36149  |
| F | 2.44654  | 1.66046  | 2.78287  |
| C | 2.49803  | -1.94653 | 1.47544  |
| F | 2.75605  | -3.25508 | 1.36149  |
| F | 3.52118  | -1.28809 | 0.96678  |
| F | 2.44654  | -1.66046 | 2.78287  |
| C | 1.60450  | -2.04180 | -1.69511 |
| F | 2.87945  | -1.77367 | -1.43511 |
| F | 1.51375  | -3.34980 | -1.96439 |
| F | 1.27366  | -1.37878 | -2.79263 |
| C | -1.60450 | -2.04180 | -1.69511 |
| F | -1.27366 | -1.37878 | -2.79263 |
| F | -1.51375 | -3.34980 | -1.96439 |
| F | -2.87945 | -1.77367 | -1.43511 |
| C | -2.49803 | -1.94653 | 1.47544  |
| F | -3.52118 | -1.28809 | 0.96678  |
| F | -2.75605 | -3.25508 | 1.36149  |
| F | -2.44654 | -1.66046 | 2.78287  |

45

Energy: -2726679.7581607

|    |          |          |          |
|----|----------|----------|----------|
| Fe | 0.00000  | 0.00000  | 0.26260  |
| C  | -2.03387 | 0.33729  | 0.18712  |
| C  | -1.66213 | -0.56051 | -0.86164 |
| C  | -1.67471 | -0.26948 | 1.42672  |
| C  | -1.06827 | -1.70711 | -0.25339 |
| C  | -1.08395 | -1.52047 | 1.14684  |
| H  | -0.68907 | -2.20814 | 1.87634  |
| C  | 1.66213  | 0.56051  | -0.86164 |
| C  | 1.06827  | 1.70711  | -0.25339 |
| C  | 2.03387  | -0.33729 | 0.18712  |
| C  | 1.08395  | 1.52047  | 1.14684  |
| C  | 1.67471  | 0.26948  | 1.42672  |
| H  | 0.68907  | 2.20814  | 1.87634  |

|   |          |          |          |
|---|----------|----------|----------|
| C | -2.85844 | 1.59368  | 0.05718  |
| F | -4.15451 | 1.28641  | 0.15152  |
| F | -2.57711 | 2.45795  | 1.03234  |
| F | -2.67003 | 2.21292  | -1.10034 |
| C | -2.03231 | -0.39253 | -2.32061 |
| F | -3.33865 | -0.12716 | -2.41819 |
| F | -1.36911 | 0.59377  | -2.91452 |
| F | -1.80388 | -1.50641 | -3.00748 |
| C | -0.66051 | -3.02725 | -0.86045 |
| F | -1.75363 | -3.71786 | -1.19963 |
| F | 0.11115  | -2.92603 | -1.93039 |
| F | 0.00000  | -3.75131 | 0.04955  |
| C | -1.97694 | 0.19920  | 2.82855  |
| F | -1.34032 | 1.31889  | 3.17306  |
| F | -3.28452 | 0.41557  | 2.97130  |
| F | -1.62361 | -0.74304 | 3.70478  |
| C | 0.66051  | 3.02725  | -0.86045 |
| F | -0.11115 | 2.92603  | -1.93039 |
| F | 0.00000  | 3.75131  | 0.04955  |
| F | 1.75363  | 3.71786  | -1.19963 |
| C | 2.03231  | 0.39253  | -2.32061 |
| F | 1.80388  | 1.50641  | -3.00748 |
| F | 3.33865  | 0.12716  | -2.41819 |
| F | 1.36911  | -0.59377 | -2.91452 |
| C | 2.85844  | -1.59368 | 0.05718  |
| F | 2.67003  | -2.21292 | -1.10034 |
| F | 4.15451  | -1.28641 | 0.15152  |
| F | 2.57711  | -2.45795 | 1.03234  |
| C | 1.97694  | -0.19920 | 2.82855  |
| F | 1.34032  | -1.31889 | 3.17306  |
| F | 3.28452  | -0.41557 | 2.97130  |
| F | 1.62361  | 0.74304  | 3.70478  |

45

Energy: -2726675.4915732

|    |          |          |          |
|----|----------|----------|----------|
| Fe | 0.00000  | 0.00000  | 0.00000  |
| C  | 1.91618  | 0.19056  | 0.71609  |
| C  | 1.91618  | 0.19056  | -0.71609 |
| C  | 1.14316  | 1.31266  | 1.14726  |
| C  | 1.14316  | 1.31266  | -1.14726 |
| C  | 0.66533  | 1.97629  | 0.00000  |
| H  | 0.03889  | 2.85286  | 0.00000  |
| C  | -1.14316 | -1.31266 | -1.14726 |
| C  | -0.66533 | -1.97629 | 0.00000  |
| C  | -1.91618 | -0.19056 | -0.71609 |
| C  | -1.14316 | -1.31266 | 1.14726  |
| H  | -0.03889 | -2.85286 | 0.00000  |
| C  | -1.91618 | -0.19056 | 0.71609  |
| C  | 2.71677  | -0.73032 | 1.60585  |
| F  | 4.02101  | -0.49820 | 1.44704  |
| F  | 2.42419  | -0.53566 | 2.88704  |
| F  | 2.49946  | -2.01757 | 1.33569  |
| C  | 2.71677  | -0.73032 | -1.60585 |
| F  | 4.02101  | -0.49820 | -1.44704 |
| F  | 2.49946  | -2.01757 | -1.33569 |
| F  | 2.42419  | -0.53566 | -2.88704 |
| C  | 1.02414  | 1.95425  | -2.51215 |



|   |          |          |          |
|---|----------|----------|----------|
| F | 2.24193  | 2.30622  | -2.93636 |
| F | 0.46422  | 1.20494  | -3.44610 |
| F | 0.29781  | 3.07273  | -2.41173 |
| C | 1.02414  | 1.95425  | 2.51215  |
| F | 0.46422  | 1.20494  | 3.44610  |
| F | 2.24193  | 2.30622  | 2.93636  |
| F | 0.29781  | 3.07273  | 2.41173  |
| C | -1.02414 | -1.95425 | -2.51215 |
| F | -0.46422 | -1.20494 | -3.44610 |
| F | -0.29781 | -3.07273 | -2.41173 |
| F | -2.24193 | -2.30622 | -2.93636 |
| C | -2.71677 | 0.73032  | -1.60585 |
| F | -2.42419 | 0.53566  | -2.88704 |
| F | -4.02101 | 0.49820  | -1.44704 |
| F | -2.49946 | 2.01757  | -1.33569 |
| C | -2.71677 | 0.73032  | 1.60585  |
| F | -2.49946 | 2.01757  | 1.33569  |
| F | -4.02101 | 0.49820  | 1.44704  |
| F | -2.42419 | 0.53566  | 2.88704  |
| C | -1.02414 | -1.95425 | 2.51215  |
| F | -0.46422 | -1.20494 | 3.44610  |
| F | -2.24193 | -2.30622 | 2.93636  |
| F | -0.29781 | -3.07273 | 2.41173  |

33

Energy: -1881130.0955657

|    |          |          |          |
|----|----------|----------|----------|
| Fe | 0.73917  | 0.76650  | 0.00000  |
| C  | -0.78246 | -0.35997 | 0.71804  |
| C  | -0.78246 | -0.35997 | -0.71804 |
| C  | 0.47274  | -0.89810 | 1.14798  |
| C  | 0.47274  | -0.89810 | -1.14798 |
| C  | 1.22586  | -1.23081 | 0.00000  |
| H  | 2.22330  | -1.63717 | 0.00000  |
| C  | 1.04494  | 2.44040  | -1.14783 |
| C  | 0.27778  | 2.76649  | 0.00000  |
| C  | 2.28833  | 1.91431  | -0.70925 |
| H  | 0.72363  | 2.53281  | -2.17399 |
| C  | 1.04494  | 2.44040  | 1.14783  |
| H  | -0.73297 | 3.14423  | 0.00000  |
| C  | 2.28833  | 1.91431  | 0.70925  |
| H  | 3.07724  | 1.54162  | -1.34501 |
| H  | 0.72363  | 2.53281  | 2.17399  |
| H  | 3.07724  | 1.54162  | 1.34501  |
| C  | -1.94104 | 0.01073  | 1.60423  |
| F  | -2.93696 | -0.87059 | 1.46474  |
| F  | -1.59112 | 0.01429  | 2.89006  |
| F  | -2.43989 | 1.21857  | 1.33133  |
| C  | -1.94104 | 0.01073  | -1.60423 |
| F  | -2.93696 | -0.87059 | -1.46474 |
| F  | -2.43989 | 1.21857  | -1.33133 |
| F  | -1.59112 | 0.01429  | -2.89006 |
| C  | 0.98634  | -1.16574 | -2.53499 |
| F  | 0.24536  | -2.08347 | -3.16002 |
| F  | 1.03292  | -0.08273 | -3.31357 |
| F  | 2.23643  | -1.64599 | -2.46797 |
| C  | 0.98634  | -1.16574 | 2.53499  |
| F  | 1.03292  | -0.08273 | 3.31357  |

|   |         |          |         |
|---|---------|----------|---------|
| F | 0.24536 | -2.08347 | 3.16002 |
| F | 2.23643 | -1.64599 | 2.46797 |

45

Energy: -2726679.7581607

|    |          |          |          |
|----|----------|----------|----------|
| Fe | 0.00000  | 0.00000  | 0.26260  |
| C  | 1.66214  | -0.56051 | -0.86164 |
| C  | 2.03387  | 0.33729  | 0.18713  |
| C  | 1.06828  | -1.70711 | -0.25339 |
| C  | 1.67471  | -0.26949 | 1.42672  |
| C  | 1.08394  | -1.52047 | 1.14684  |
| H  | 0.68906  | -2.20815 | 1.87633  |
| C  | -1.06828 | 1.70711  | -0.25339 |
| C  | -1.66214 | 0.56051  | -0.86164 |
| C  | -1.08394 | 1.52047  | 1.14684  |
| C  | -2.03387 | -0.33729 | 0.18713  |
| C  | -1.67471 | 0.26949  | 1.42672  |
| H  | -0.68906 | 2.20815  | 1.87633  |
| C  | 2.03234  | -0.39253 | -2.32061 |
| F  | 3.33867  | -0.12713 | -2.41818 |
| F  | 1.80394  | -1.50643 | -3.00747 |
| F  | 1.36912  | 0.59374  | -2.91454 |
| C  | 2.85844  | 1.59368  | 0.05719  |
| F  | 4.15451  | 1.28641  | 0.15152  |
| F  | 2.67003  | 2.21292  | -1.10033 |
| F  | 2.57711  | 2.45795  | 1.03235  |
| C  | 1.97693  | 0.19918  | 2.82856  |
| F  | 3.28450  | 0.41555  | 2.97132  |
| F  | 1.34032  | 1.31888  | 3.17307  |
| F  | 1.62359  | -0.74306 | 3.70478  |
| C  | 0.66051  | -3.02725 | -0.86047 |
| F  | -0.11113 | -2.92601 | -1.93041 |
| F  | 1.75364  | -3.71786 | -1.19965 |
| F  | 0.00000  | -3.75132 | 0.04952  |
| C  | -1.97693 | -0.19918 | 2.82856  |
| F  | -3.28450 | -0.41555 | 2.97132  |
| F  | -1.34032 | -1.31888 | 3.17307  |
| F  | -1.62359 | 0.74306  | 3.70478  |
| C  | -2.85844 | -1.59368 | 0.05719  |
| F  | -2.57711 | -2.45795 | 1.03235  |
| F  | -4.15451 | -1.28641 | 0.15152  |
| F  | -2.67003 | -2.21292 | -1.10033 |
| C  | -2.03234 | 0.39253  | -2.32061 |
| F  | -1.36912 | -0.59374 | -2.91454 |
| F  | -3.33867 | 0.12713  | -2.41818 |
| F  | -1.80394 | 1.50643  | -3.00747 |
| C  | -0.66051 | 3.02725  | -0.86047 |
| F  | 0.11113  | 2.92601  | -1.93041 |
| F  | -1.75364 | 3.71786  | -1.19965 |
| F  | 0.00000  | 3.75132  | 0.04952  |

51

Energy: -1282013.9427275

|    |          |         |          |
|----|----------|---------|----------|
| Fe | 0.00000  | 0.00000 | 0.00000  |
| C  | -1.16678 | 1.18055 | -1.20107 |
| C  | -0.85137 | 1.87102 | -0.00000 |

|   |          |          |          |
|---|----------|----------|----------|
| C | -1.78998 | -0.07180 | -1.17429 |
| H | -0.76709 | 1.56642  | -2.13443 |
| C | -1.16678 | 1.18055  | 1.20107  |
| C | -1.78998 | -0.07179 | 1.17429  |
| H | -0.76709 | 1.56643  | 2.13443  |
| C | -2.67395 | -0.40999 | 0.00000  |
| H | -2.82438 | -1.49714 | 0.00000  |
| C | 0.85137  | -1.87102 | -0.00000 |
| C | 1.16678  | -1.18055 | -1.20107 |
| C | 1.16678  | -1.18055 | 1.20106  |
| C | 1.78998  | 0.07180  | -1.17429 |
| H | 0.76709  | -1.56642 | -2.13444 |
| C | 1.78998  | 0.07179  | 1.17429  |
| H | 0.76709  | -1.56643 | 2.13443  |
| C | 2.67395  | 0.40999  | 0.00000  |
| H | 2.82438  | 1.49714  | 0.00000  |
| C | 4.04857  | -0.26244 | 0.00000  |
| H | 4.62876  | 0.02230  | 0.88249  |
| H | 3.94025  | -1.34956 | 0.00000  |
| H | 4.62876  | 0.02230  | -0.88249 |
| C | -4.04857 | 0.26244  | 0.00000  |
| H | -4.62876 | -0.02231 | -0.88249 |
| H | -4.62876 | -0.02230 | 0.88249  |
| H | -3.94025 | 1.34956  | -0.00000 |
| C | -0.21025 | 3.22046  | -0.00000 |
| H | 0.41427  | 3.36401  | 0.88466  |
| H | 0.41428  | 3.36401  | -0.88466 |
| H | -0.96372 | 4.01559  | -0.00001 |
| C | -1.98031 | -0.84465 | 2.44237  |
| H | -1.28218 | -0.53107 | 3.22186  |
| H | -2.99587 | -0.70940 | 2.83484  |
| H | -1.84735 | -1.91863 | 2.28148  |
| C | -1.98031 | -0.84465 | -2.44237 |
| H | -2.99586 | -0.70939 | -2.83485 |
| H | -1.28216 | -0.53108 | -3.22185 |
| H | -1.84737 | -1.91863 | -2.28147 |
| C | 1.98031  | 0.84465  | -2.44237 |
| H | 2.99587  | 0.70940  | -2.83483 |
| H | 1.28218  | 0.53107  | -3.22186 |
| H | 1.84735  | 1.91863  | -2.28147 |
| C | 1.98031  | 0.84464  | 2.44237  |
| H | 1.28216  | 0.53108  | 3.22186  |
| H | 2.99586  | 0.70938  | 2.83485  |
| H | 1.84737  | 1.91863  | 2.28148  |
| C | 0.21025  | -3.22046 | -0.00001 |
| H | -0.41427 | -3.36401 | -0.88467 |
| H | 0.96372  | -4.01559 | 0.00000  |
| H | -0.41428 | -3.36401 | 0.88465  |
